# Supplementary material for: Patterns and changes in life expectancy in China, 1990-2016
Source: PLoS One. 2020 Apr 1;15(4):e0231007. doi: 10.1371/journal.pone.0231007 (PMC7112202; doi:10.1371/journal.pone.0231007)
Supplement: S1 Data — (XLSX) [file pone.0231007.s007.xlsx]

## Sheet: Rate
measure	location	sex	age	cause	metric	year	val
Deaths	China	Both	<1 year	Cardiovascular diseases	Rate	1990	72.1539
Deaths	China	Both	1 to 4	Cardiovascular diseases	Rate	1990	9.99662
Deaths	China	Both	10 to 14	Cardiovascular diseases	Rate	1990	5.15025
Deaths	China	Both	15 to 19	Cardiovascular diseases	Rate	1990	10.1867
Deaths	China	Both	20 to 24	Cardiovascular diseases	Rate	1990	15.6743
Deaths	China	Both	25 to 29	Cardiovascular diseases	Rate	1990	17.2061
Deaths	China	Both	30 to 34	Cardiovascular diseases	Rate	1990	27.0827
Deaths	China	Both	35 to 39	Cardiovascular diseases	Rate	1990	43.6888
Deaths	China	Both	40 to 44	Cardiovascular diseases	Rate	1990	75.9854
Deaths	China	Both	45 to 49	Cardiovascular diseases	Rate	1990	139.433
Deaths	China	Both	5 to 9	Cardiovascular diseases	Rate	1990	4.62916
Deaths	China	Both	50 to 54	Cardiovascular diseases	Rate	1990	255.155
Deaths	China	Both	55 to 59	Cardiovascular diseases	Rate	1990	438.062
Deaths	China	Both	60 to 64	Cardiovascular diseases	Rate	1990	791.851
Deaths	China	Both	65 to 69	Cardiovascular diseases	Rate	1990	1336.36
Deaths	China	Both	70 to 74	Cardiovascular diseases	Rate	1990	2312.97
Deaths	China	Both	75 to 79	Cardiovascular diseases	Rate	1990	3561.06
Deaths	China	Both	80 to 84	Cardiovascular diseases	Rate	1990	5582.08
Deaths	China	Both	85 to 89	Cardiovascular diseases	Rate	1990	8330.14
Deaths	China	Both	90 to 94	Cardiovascular diseases	Rate	1990	12119.5
Deaths	China	Both	95 plus	Cardiovascular diseases	Rate	1990	18774.5
Deaths	China	Both	<1 year	Chronic respiratory diseases	Rate	1990	0
Deaths	China	Both	1 to 4	Chronic respiratory diseases	Rate	1990	3.1897
Deaths	China	Both	10 to 14	Chronic respiratory diseases	Rate	1990	1.16027
Deaths	China	Both	15 to 19	Chronic respiratory diseases	Rate	1990	2.50897
Deaths	China	Both	20 to 24	Chronic respiratory diseases	Rate	1990	3.34866
Deaths	China	Both	25 to 29	Chronic respiratory diseases	Rate	1990	4.25162
Deaths	China	Both	30 to 34	Chronic respiratory diseases	Rate	1990	6.88028
Deaths	China	Both	35 to 39	Chronic respiratory diseases	Rate	1990	10.5449
Deaths	China	Both	40 to 44	Chronic respiratory diseases	Rate	1990	18.8346
Deaths	China	Both	45 to 49	Chronic respiratory diseases	Rate	1990	36.5617
Deaths	China	Both	5 to 9	Chronic respiratory diseases	Rate	1990	1.15052
Deaths	China	Both	50 to 54	Chronic respiratory diseases	Rate	1990	76.9646
Deaths	China	Both	55 to 59	Chronic respiratory diseases	Rate	1990	154.021
Deaths	China	Both	60 to 64	Chronic respiratory diseases	Rate	1990	350.291
Deaths	China	Both	65 to 69	Chronic respiratory diseases	Rate	1990	673.526
Deaths	China	Both	70 to 74	Chronic respiratory diseases	Rate	1990	1438.03
Deaths	China	Both	75 to 79	Chronic respiratory diseases	Rate	1990	2330.42
Deaths	China	Both	80 to 84	Chronic respiratory diseases	Rate	1990	3718.74
Deaths	China	Both	85 to 89	Chronic respiratory diseases	Rate	1990	5590.7
Deaths	China	Both	90 to 94	Chronic respiratory diseases	Rate	1990	7829.88
Deaths	China	Both	95 plus	Chronic respiratory diseases	Rate	1990	11558.2
Deaths	China	Both	1 to 4	Cirrhosis and other chronic liver diseases	Rate	1990	1.21417
Deaths	China	Both	10 to 14	Cirrhosis and other chronic liver diseases	Rate	1990	0.550327
Deaths	China	Both	15 to 19	Cirrhosis and other chronic liver diseases	Rate	1990	0.871166
Deaths	China	Both	20 to 24	Cirrhosis and other chronic liver diseases	Rate	1990	1.68201
Deaths	China	Both	25 to 29	Cirrhosis and other chronic liver diseases	Rate	1990	3.10463
Deaths	China	Both	30 to 34	Cirrhosis and other chronic liver diseases	Rate	1990	6.46824
Deaths	China	Both	35 to 39	Cirrhosis and other chronic liver diseases	Rate	1990	11.4187
Deaths	China	Both	40 to 44	Cirrhosis and other chronic liver diseases	Rate	1990	18.3228
Deaths	China	Both	45 to 49	Cirrhosis and other chronic liver diseases	Rate	1990	28.2835
Deaths	China	Both	5 to 9	Cirrhosis and other chronic liver diseases	Rate	1990	0.517659
Deaths	China	Both	50 to 54	Cirrhosis and other chronic liver diseases	Rate	1990	38.1323
Deaths	China	Both	55 to 59	Cirrhosis and other chronic liver diseases	Rate	1990	47.4297
Deaths	China	Both	60 to 64	Cirrhosis and other chronic liver diseases	Rate	1990	59.5599
Deaths	China	Both	65 to 69	Cirrhosis and other chronic liver diseases	Rate	1990	73.2425
Deaths	China	Both	70 to 74	Cirrhosis and other chronic liver diseases	Rate	1990	87.5928
Deaths	China	Both	75 to 79	Cirrhosis and other chronic liver diseases	Rate	1990	102.585
Deaths	China	Both	80 to 84	Cirrhosis and other chronic liver diseases	Rate	1990	115.199
Deaths	China	Both	85 to 89	Cirrhosis and other chronic liver diseases	Rate	1990	126.636
Deaths	China	Both	90 to 94	Cirrhosis and other chronic liver diseases	Rate	1990	128.737
Deaths	China	Both	95 plus	Cirrhosis and other chronic liver diseases	Rate	1990	162.844
Deaths	China	Both	<1 year	Communicable, maternal, neonatal, and nutritional diseases	Rate	1990	3364.35
Deaths	China	Both	1 to 4	Communicable, maternal, neonatal, and nutritional diseases	Rate	1990	136.166
Deaths	China	Both	10 to 14	Communicable, maternal, neonatal, and nutritional diseases	Rate	1990	11.6097
Deaths	China	Both	15 to 19	Communicable, maternal, neonatal, and nutritional diseases	Rate	1990	11.1461
Deaths	China	Both	20 to 24	Communicable, maternal, neonatal, and nutritional diseases	Rate	1990	16.4611
Deaths	China	Both	25 to 29	Communicable, maternal, neonatal, and nutritional diseases	Rate	1990	16.928
Deaths	China	Both	30 to 34	Communicable, maternal, neonatal, and nutritional diseases	Rate	1990	20.8255
Deaths	China	Both	35 to 39	Communicable, maternal, neonatal, and nutritional diseases	Rate	1990	22.707
Deaths	China	Both	40 to 44	Communicable, maternal, neonatal, and nutritional diseases	Rate	1990	26.6954
Deaths	China	Both	45 to 49	Communicable, maternal, neonatal, and nutritional diseases	Rate	1990	35.4136
Deaths	China	Both	5 to 9	Communicable, maternal, neonatal, and nutritional diseases	Rate	1990	20.7253
Deaths	China	Both	50 to 54	Communicable, maternal, neonatal, and nutritional diseases	Rate	1990	47.4289
Deaths	China	Both	55 to 59	Communicable, maternal, neonatal, and nutritional diseases	Rate	1990	67.752
Deaths	China	Both	60 to 64	Communicable, maternal, neonatal, and nutritional diseases	Rate	1990	104.775
Deaths	China	Both	65 to 69	Communicable, maternal, neonatal, and nutritional diseases	Rate	1990	157.681
Deaths	China	Both	70 to 74	Communicable, maternal, neonatal, and nutritional diseases	Rate	1990	259.248
Deaths	China	Both	75 to 79	Communicable, maternal, neonatal, and nutritional diseases	Rate	1990	392.304
Deaths	China	Both	80 to 84	Communicable, maternal, neonatal, and nutritional diseases	Rate	1990	637.155
Deaths	China	Both	85 to 89	Communicable, maternal, neonatal, and nutritional diseases	Rate	1990	1016.13
Deaths	China	Both	90 to 94	Communicable, maternal, neonatal, and nutritional diseases	Rate	1990	1601.15
Deaths	China	Both	95 plus	Communicable, maternal, neonatal, and nutritional diseases	Rate	1990	2954.72
Deaths	China	Both	<1 year	Diabetes, urogenital, blood, and endocrine diseases	Rate	1990	35.6043
Deaths	China	Both	1 to 4	Diabetes, urogenital, blood, and endocrine diseases	Rate	1990	7.12356
Deaths	China	Both	10 to 14	Diabetes, urogenital, blood, and endocrine diseases	Rate	1990	3.06726
Deaths	China	Both	15 to 19	Diabetes, urogenital, blood, and endocrine diseases	Rate	1990	3.48318
Deaths	China	Both	20 to 24	Diabetes, urogenital, blood, and endocrine diseases	Rate	1990	4.98664
Deaths	China	Both	25 to 29	Diabetes, urogenital, blood, and endocrine diseases	Rate	1990	5.39992
Deaths	China	Both	30 to 34	Diabetes, urogenital, blood, and endocrine diseases	Rate	1990	7.27881
Deaths	China	Both	35 to 39	Diabetes, urogenital, blood, and endocrine diseases	Rate	1990	9.13797
Deaths	China	Both	40 to 44	Diabetes, urogenital, blood, and endocrine diseases	Rate	1990	12.1528
Deaths	China	Both	45 to 49	Diabetes, urogenital, blood, and endocrine diseases	Rate	1990	17.7673
Deaths	China	Both	5 to 9	Diabetes, urogenital, blood, and endocrine diseases	Rate	1990	2.94912
Deaths	China	Both	50 to 54	Diabetes, urogenital, blood, and endocrine diseases	Rate	1990	26.3774
Deaths	China	Both	55 to 59	Diabetes, urogenital, blood, and endocrine diseases	Rate	1990	41.7291
Deaths	China	Both	60 to 64	Diabetes, urogenital, blood, and endocrine diseases	Rate	1990	68.3879
Deaths	China	Both	65 to 69	Diabetes, urogenital, blood, and endocrine diseases	Rate	1990	105.772
Deaths	China	Both	70 to 74	Diabetes, urogenital, blood, and endocrine diseases	Rate	1990	157.462
Deaths	China	Both	75 to 79	Diabetes, urogenital, blood, and endocrine diseases	Rate	1990	227.78
Deaths	China	Both	80 to 84	Diabetes, urogenital, blood, and endocrine diseases	Rate	1990	295.927
Deaths	China	Both	85 to 89	Diabetes, urogenital, blood, and endocrine diseases	Rate	1990	413.637
Deaths	China	Both	90 to 94	Diabetes, urogenital, blood, and endocrine diseases	Rate	1990	573.397
Deaths	China	Both	95 plus	Diabetes, urogenital, blood, and endocrine diseases	Rate	1990	893.264
Deaths	China	Both	<1 year	Diarrhea, lower respiratory, and other common infectious diseases	Rate	1990	1501.3
Deaths	China	Both	1 to 4	Diarrhea, lower respiratory, and other common infectious diseases	Rate	1990	123.526
Deaths	China	Both	10 to 14	Diarrhea, lower respiratory, and other common infectious diseases	Rate	1990	7.731
Deaths	China	Both	15 to 19	Diarrhea, lower respiratory, and other common infectious diseases	Rate	1990	5.13716
Deaths	China	Both	20 to 24	Diarrhea, lower respiratory, and other common infectious diseases	Rate	1990	4.37167
Deaths	China	Both	25 to 29	Diarrhea, lower respiratory, and other common infectious diseases	Rate	1990	4.07647
Deaths	China	Both	30 to 34	Diarrhea, lower respiratory, and other common infectious diseases	Rate	1990	4.68701
Deaths	China	Both	35 to 39	Diarrhea, lower respiratory, and other common infectious diseases	Rate	1990	4.88566
Deaths	China	Both	40 to 44	Diarrhea, lower respiratory, and other common infectious diseases	Rate	1990	6.29032
Deaths	China	Both	45 to 49	Diarrhea, lower respiratory, and other common infectious diseases	Rate	1990	8.76573
Deaths	China	Both	5 to 9	Diarrhea, lower respiratory, and other common infectious diseases	Rate	1990	16.4752
Deaths	China	Both	50 to 54	Diarrhea, lower respiratory, and other common infectious diseases	Rate	1990	12.345
Deaths	China	Both	55 to 59	Diarrhea, lower respiratory, and other common infectious diseases	Rate	1990	18.197
Deaths	China	Both	60 to 64	Diarrhea, lower respiratory, and other common infectious diseases	Rate	1990	31.3102
Deaths	China	Both	65 to 69	Diarrhea, lower respiratory, and other common infectious diseases	Rate	1990	53.6306
Deaths	China	Both	70 to 74	Diarrhea, lower respiratory, and other common infectious diseases	Rate	1990	109.003
Deaths	China	Both	75 to 79	Diarrhea, lower respiratory, and other common infectious diseases	Rate	1990	196.781
Deaths	China	Both	80 to 84	Diarrhea, lower respiratory, and other common infectious diseases	Rate	1990	395.374
Deaths	China	Both	85 to 89	Diarrhea, lower respiratory, and other common infectious diseases	Rate	1990	692.822
Deaths	China	Both	90 to 94	Diarrhea, lower respiratory, and other common infectious diseases	Rate	1990	1174.29
Deaths	China	Both	95 plus	Diarrhea, lower respiratory, and other common infectious diseases	Rate	1990	2137.94
Deaths	China	Both	<1 year	Digestive diseases	Rate	1990	27.1827
Deaths	China	Both	1 to 4	Digestive diseases	Rate	1990	7.07791
Deaths	China	Both	10 to 14	Digestive diseases	Rate	1990	1.17421
Deaths	China	Both	15 to 19	Digestive diseases	Rate	1990	1.2864
Deaths	China	Both	20 to 24	Digestive diseases	Rate	1990	1.89291
Deaths	China	Both	25 to 29	Digestive diseases	Rate	1990	2.39352
Deaths	China	Both	30 to 34	Digestive diseases	Rate	1990	3.53914
Deaths	China	Both	35 to 39	Digestive diseases	Rate	1990	4.56939
Deaths	China	Both	40 to 44	Digestive diseases	Rate	1990	6.66621
Deaths	China	Both	45 to 49	Digestive diseases	Rate	1990	10.6477
Deaths	China	Both	5 to 9	Digestive diseases	Rate	1990	1.62682
Deaths	China	Both	50 to 54	Digestive diseases	Rate	1990	15.9219
Deaths	China	Both	55 to 59	Digestive diseases	Rate	1990	24.6966
Deaths	China	Both	60 to 64	Digestive diseases	Rate	1990	39.3629
Deaths	China	Both	65 to 69	Digestive diseases	Rate	1990	60.1747
Deaths	China	Both	70 to 74	Digestive diseases	Rate	1990	99.757
Deaths	China	Both	75 to 79	Digestive diseases	Rate	1990	156.278
Deaths	China	Both	80 to 84	Digestive diseases	Rate	1990	236.275
Deaths	China	Both	85 to 89	Digestive diseases	Rate	1990	352.74
Deaths	China	Both	90 to 94	Digestive diseases	Rate	1990	498.733
Deaths	China	Both	95 plus	Digestive diseases	Rate	1990	709.213
Deaths	China	Both	<1 year	Forces of nature, conflict and terrorism, and executions and police conflict	Rate	1990	0.269584
Deaths	China	Both	1 to 4	Forces of nature, conflict and terrorism, and executions and police conflict	Rate	1990	0.15603
Deaths	China	Both	10 to 14	Forces of nature, conflict and terrorism, and executions and police conflict	Rate	1990	0.146343
Deaths	China	Both	15 to 19	Forces of nature, conflict and terrorism, and executions and police conflict	Rate	1990	0.560024
Deaths	China	Both	20 to 24	Forces of nature, conflict and terrorism, and executions and police conflict	Rate	1990	2.01066
Deaths	China	Both	25 to 29	Forces of nature, conflict and terrorism, and executions and police conflict	Rate	1990	2.1284
Deaths	China	Both	30 to 34	Forces of nature, conflict and terrorism, and executions and police conflict	Rate	1990	1.86446
Deaths	China	Both	35 to 39	Forces of nature, conflict and terrorism, and executions and police conflict	Rate	1990	1.5495
Deaths	China	Both	40 to 44	Forces of nature, conflict and terrorism, and executions and police conflict	Rate	1990	0.858167
Deaths	China	Both	45 to 49	Forces of nature, conflict and terrorism, and executions and police conflict	Rate	1990	0.921809
Deaths	China	Both	5 to 9	Forces of nature, conflict and terrorism, and executions and police conflict	Rate	1990	0.135146
Deaths	China	Both	50 to 54	Forces of nature, conflict and terrorism, and executions and police conflict	Rate	1990	0.692213
Deaths	China	Both	55 to 59	Forces of nature, conflict and terrorism, and executions and police conflict	Rate	1990	0.433797
Deaths	China	Both	60 to 64	Forces of nature, conflict and terrorism, and executions and police conflict	Rate	1990	0.411848
Deaths	China	Both	65 to 69	Forces of nature, conflict and terrorism, and executions and police conflict	Rate	1990	0.409482
Deaths	China	Both	70 to 74	Forces of nature, conflict and terrorism, and executions and police conflict	Rate	1990	0.392845
Deaths	China	Both	75 to 79	Forces of nature, conflict and terrorism, and executions and police conflict	Rate	1990	0.342205
Deaths	China	Both	80 to 84	Forces of nature, conflict and terrorism, and executions and police conflict	Rate	1990	0.533834
Deaths	China	Both	85 to 89	Forces of nature, conflict and terrorism, and executions and police conflict	Rate	1990	0.46707
Deaths	China	Both	90 to 94	Forces of nature, conflict and terrorism, and executions and police conflict	Rate	1990	0.812993
Deaths	China	Both	95 plus	Forces of nature, conflict and terrorism, and executions and police conflict	Rate	1990	2.66625
Deaths	China	Both	<1 year	HIV/AIDS and tuberculosis	Rate	1990	7.51722
Deaths	China	Both	1 to 4	HIV/AIDS and tuberculosis	Rate	1990	3.04466
Deaths	China	Both	10 to 14	HIV/AIDS and tuberculosis	Rate	1990	1.73543
Deaths	China	Both	15 to 19	HIV/AIDS and tuberculosis	Rate	1990	2.74798
Deaths	China	Both	20 to 24	HIV/AIDS and tuberculosis	Rate	1990	4.78089
Deaths	China	Both	25 to 29	HIV/AIDS and tuberculosis	Rate	1990	5.31138
Deaths	China	Both	30 to 34	HIV/AIDS and tuberculosis	Rate	1990	7.67016
Deaths	China	Both	35 to 39	HIV/AIDS and tuberculosis	Rate	1990	9.60511
Deaths	China	Both	40 to 44	HIV/AIDS and tuberculosis	Rate	1990	13.1857
Deaths	China	Both	45 to 49	HIV/AIDS and tuberculosis	Rate	1990	18.6026
Deaths	China	Both	5 to 9	HIV/AIDS and tuberculosis	Rate	1990	1.27277
Deaths	China	Both	50 to 54	HIV/AIDS and tuberculosis	Rate	1990	26.1571
Deaths	China	Both	55 to 59	HIV/AIDS and tuberculosis	Rate	1990	39.1237
Deaths	China	Both	60 to 64	HIV/AIDS and tuberculosis	Rate	1990	60.443
Deaths	China	Both	65 to 69	HIV/AIDS and tuberculosis	Rate	1990	85.8224
Deaths	China	Both	70 to 74	HIV/AIDS and tuberculosis	Rate	1990	124.345
Deaths	China	Both	75 to 79	HIV/AIDS and tuberculosis	Rate	1990	157.636
Deaths	China	Both	80 to 84	HIV/AIDS and tuberculosis	Rate	1990	177.617
Deaths	China	Both	85 to 89	HIV/AIDS and tuberculosis	Rate	1990	204.197
Deaths	China	Both	90 to 94	HIV/AIDS and tuberculosis	Rate	1990	189.742
Deaths	China	Both	95 plus	HIV/AIDS and tuberculosis	Rate	1990	229.208
Deaths	China	Both	<1 year	Injuries	Rate	1990	199.925
Deaths	China	Both	1 to 4	Injuries	Rate	1990	117.948
Deaths	China	Both	10 to 14	Injuries	Rate	1990	51.2087
Deaths	China	Both	15 to 19	Injuries	Rate	1990	61.4967
Deaths	China	Both	20 to 24	Injuries	Rate	1990	84.3161
Deaths	China	Both	25 to 29	Injuries	Rate	1990	76.6984
Deaths	China	Both	30 to 34	Injuries	Rate	1990	79.0284
Deaths	China	Both	35 to 39	Injuries	Rate	1990	79.449
Deaths	China	Both	40 to 44	Injuries	Rate	1990	78.1199
Deaths	China	Both	45 to 49	Injuries	Rate	1990	84.8547
Deaths	China	Both	5 to 9	Injuries	Rate	1990	60.7285
Deaths	China	Both	50 to 54	Injuries	Rate	1990	86.8819
Deaths	China	Both	55 to 59	Injuries	Rate	1990	95.7432
Deaths	China	Both	60 to 64	Injuries	Rate	1990	107.517
Deaths	China	Both	65 to 69	Injuries	Rate	1990	129.458
Deaths	China	Both	70 to 74	Injuries	Rate	1990	171.722
Deaths	China	Both	75 to 79	Injuries	Rate	1990	226.487
Deaths	China	Both	80 to 84	Injuries	Rate	1990	319.054
Deaths	China	Both	85 to 89	Injuries	Rate	1990	458.043
Deaths	China	Both	90 to 94	Injuries	Rate	1990	626.751
Deaths	China	Both	95 plus	Injuries	Rate	1990	948.492
Deaths	China	Both	10 to 14	Maternal disorders	Rate	1990	0.218846
Deaths	China	Both	15 to 19	Maternal disorders	Rate	1990	1.73749
Deaths	China	Both	20 to 24	Maternal disorders	Rate	1990	5.37303
Deaths	China	Both	25 to 29	Maternal disorders	Rate	1990	5.35717
Deaths	China	Both	30 to 34	Maternal disorders	Rate	1990	5.20479
Deaths	China	Both	35 to 39	Maternal disorders	Rate	1990	3.88428
Deaths	China	Both	40 to 44	Maternal disorders	Rate	1990	1.74554
Deaths	China	Both	45 to 49	Maternal disorders	Rate	1990	0.697326
Deaths	China	Both	50 to 54	Maternal disorders	Rate	1990	0.217644
Deaths	China	Both	<1 year	Mental disorders	Rate	1990	0.0263395
Deaths	China	Both	1 to 4	Mental disorders	Rate	1990	0
Deaths	China	Both	10 to 14	Mental disorders	Rate	1990	0.00503875
Deaths	China	Both	15 to 19	Mental disorders	Rate	1990	2.91913
Deaths	China	Both	20 to 24	Mental disorders	Rate	1990	4.60153
Deaths	China	Both	25 to 29	Mental disorders	Rate	1990	5.21301
Deaths	China	Both	30 to 34	Mental disorders	Rate	1990	5.67718
Deaths	China	Both	35 to 39	Mental disorders	Rate	1990	5.53706
Deaths	China	Both	40 to 44	Mental disorders	Rate	1990	5.75786
Deaths	China	Both	45 to 49	Mental disorders	Rate	1990	6.11998
Deaths	China	Both	5 to 9	Mental disorders	Rate	1990	0.00433363
Deaths	China	Both	50 to 54	Mental disorders	Rate	1990	6.34997
Deaths	China	Both	55 to 59	Mental disorders	Rate	1990	6.86956
Deaths	China	Both	60 to 64	Mental disorders	Rate	1990	8.18362
Deaths	China	Both	65 to 69	Mental disorders	Rate	1990	9.24579
Deaths	China	Both	70 to 74	Mental disorders	Rate	1990	11.8001
Deaths	China	Both	75 to 79	Mental disorders	Rate	1990	15.1265
Deaths	China	Both	80 to 84	Mental disorders	Rate	1990	17.0797
Deaths	China	Both	85 to 89	Mental disorders	Rate	1990	25.3011
Deaths	China	Both	90 to 94	Mental disorders	Rate	1990	36.6407
Deaths	China	Both	95 plus	Mental disorders	Rate	1990	52.7828
Deaths	China	Both	10 to 14	Musculoskeletal disorders	Rate	1990	0.444925
Deaths	China	Both	15 to 19	Musculoskeletal disorders	Rate	1990	0.767499
Deaths	China	Both	20 to 24	Musculoskeletal disorders	Rate	1990	0.907417
Deaths	China	Both	25 to 29	Musculoskeletal disorders	Rate	1990	0.82904
Deaths	China	Both	30 to 34	Musculoskeletal disorders	Rate	1990	0.784482
Deaths	China	Both	35 to 39	Musculoskeletal disorders	Rate	1990	0.863085
Deaths	China	Both	40 to 44	Musculoskeletal disorders	Rate	1990	0.986901
Deaths	China	Both	45 to 49	Musculoskeletal disorders	Rate	1990	1.1765
Deaths	China	Both	5 to 9	Musculoskeletal disorders	Rate	1990	0.247609
Deaths	China	Both	50 to 54	Musculoskeletal disorders	Rate	1990	1.56224
Deaths	China	Both	55 to 59	Musculoskeletal disorders	Rate	1990	2.00761
Deaths	China	Both	60 to 64	Musculoskeletal disorders	Rate	1990	3.23039
Deaths	China	Both	65 to 69	Musculoskeletal disorders	Rate	1990	4.96588
Deaths	China	Both	70 to 74	Musculoskeletal disorders	Rate	1990	7.34541
Deaths	China	Both	75 to 79	Musculoskeletal disorders	Rate	1990	10.5658
Deaths	China	Both	80 to 84	Musculoskeletal disorders	Rate	1990	14.6532
Deaths	China	Both	85 to 89	Musculoskeletal disorders	Rate	1990	23.0218
Deaths	China	Both	90 to 94	Musculoskeletal disorders	Rate	1990	30.1212
Deaths	China	Both	95 plus	Musculoskeletal disorders	Rate	1990	45.9487
Deaths	China	Both	<1 year	Neglected tropical diseases and malaria	Rate	1990	3.74875
Deaths	China	Both	1 to 4	Neglected tropical diseases and malaria	Rate	1990	2.44375
Deaths	China	Both	10 to 14	Neglected tropical diseases and malaria	Rate	1990	0.919506
Deaths	China	Both	15 to 19	Neglected tropical diseases and malaria	Rate	1990	0.422626
Deaths	China	Both	20 to 24	Neglected tropical diseases and malaria	Rate	1990	0.409608
Deaths	China	Both	25 to 29	Neglected tropical diseases and malaria	Rate	1990	0.361433
Deaths	China	Both	30 to 34	Neglected tropical diseases and malaria	Rate	1990	0.540592
Deaths	China	Both	35 to 39	Neglected tropical diseases and malaria	Rate	1990	0.713207
Deaths	China	Both	40 to 44	Neglected tropical diseases and malaria	Rate	1990	0.922859
Deaths	China	Both	45 to 49	Neglected tropical diseases and malaria	Rate	1990	1.27054
Deaths	China	Both	5 to 9	Neglected tropical diseases and malaria	Rate	1990	1.43952
Deaths	China	Both	50 to 54	Neglected tropical diseases and malaria	Rate	1990	1.67146
Deaths	China	Both	55 to 59	Neglected tropical diseases and malaria	Rate	1990	2.25901
Deaths	China	Both	60 to 64	Neglected tropical diseases and malaria	Rate	1990	2.64746
Deaths	China	Both	65 to 69	Neglected tropical diseases and malaria	Rate	1990	3.18514
Deaths	China	Both	70 to 74	Neglected tropical diseases and malaria	Rate	1990	3.85162
Deaths	China	Both	75 to 79	Neglected tropical diseases and malaria	Rate	1990	3.89278
Deaths	China	Both	80 to 84	Neglected tropical diseases and malaria	Rate	1990	3.58851
Deaths	China	Both	85 to 89	Neglected tropical diseases and malaria	Rate	1990	3.6515
Deaths	China	Both	90 to 94	Neglected tropical diseases and malaria	Rate	1990	3.82494
Deaths	China	Both	95 plus	Neglected tropical diseases and malaria	Rate	1990	5.80651
Deaths	China	Both	<1 year	Neonatal disorders	Rate	1990	1753.27
Deaths	China	Both	1 to 4	Neonatal disorders	Rate	1990	1.99341
Deaths	China	Both	<1 year	Neoplasms	Rate	1990	25.8629
Deaths	China	Both	1 to 4	Neoplasms	Rate	1990	14.1677
Deaths	China	Both	10 to 14	Neoplasms	Rate	1990	10.3174
Deaths	China	Both	15 to 19	Neoplasms	Rate	1990	12.4257
Deaths	China	Both	20 to 24	Neoplasms	Rate	1990	14.8304
Deaths	China	Both	25 to 29	Neoplasms	Rate	1990	20.0333
Deaths	China	Both	30 to 34	Neoplasms	Rate	1990	36.7371
Deaths	China	Both	35 to 39	Neoplasms	Rate	1990	61.2792
Deaths	China	Both	40 to 44	Neoplasms	Rate	1990	104.195
Deaths	China	Both	45 to 49	Neoplasms	Rate	1990	179.339
Deaths	China	Both	5 to 9	Neoplasms	Rate	1990	10.1464
Deaths	China	Both	50 to 54	Neoplasms	Rate	1990	279.862
Deaths	China	Both	55 to 59	Neoplasms	Rate	1990	435.04
Deaths	China	Both	60 to 64	Neoplasms	Rate	1990	652.944
Deaths	China	Both	65 to 69	Neoplasms	Rate	1990	886.026
Deaths	China	Both	70 to 74	Neoplasms	Rate	1990	1133.19
Deaths	China	Both	75 to 79	Neoplasms	Rate	1990	1278.12
Deaths	China	Both	80 to 84	Neoplasms	Rate	1990	1280.91
Deaths	China	Both	85 to 89	Neoplasms	Rate	1990	1411.13
Deaths	China	Both	90 to 94	Neoplasms	Rate	1990	1544.19
Deaths	China	Both	95 plus	Neoplasms	Rate	1990	1872.56
Deaths	China	Both	<1 year	Neurological disorders	Rate	1990	8.87444
Deaths	China	Both	1 to 4	Neurological disorders	Rate	1990	2.31854
Deaths	China	Both	10 to 14	Neurological disorders	Rate	1990	1.93896
Deaths	China	Both	15 to 19	Neurological disorders	Rate	1990	2.54404
Deaths	China	Both	20 to 24	Neurological disorders	Rate	1990	2.89348
Deaths	China	Both	25 to 29	Neurological disorders	Rate	1990	2.47303
Deaths	China	Both	30 to 34	Neurological disorders	Rate	1990	2.63227
Deaths	China	Both	35 to 39	Neurological disorders	Rate	1990	2.5375
Deaths	China	Both	40 to 44	Neurological disorders	Rate	1990	2.56919
Deaths	China	Both	45 to 49	Neurological disorders	Rate	1990	3.52715
Deaths	China	Both	5 to 9	Neurological disorders	Rate	1990	1.4413
Deaths	China	Both	50 to 54	Neurological disorders	Rate	1990	6.14648
Deaths	China	Both	55 to 59	Neurological disorders	Rate	1990	10.8799
Deaths	China	Both	60 to 64	Neurological disorders	Rate	1990	22.3618
Deaths	China	Both	65 to 69	Neurological disorders	Rate	1990	48.7395
Deaths	China	Both	70 to 74	Neurological disorders	Rate	1990	120.428
Deaths	China	Both	75 to 79	Neurological disorders	Rate	1990	321.649
Deaths	China	Both	80 to 84	Neurological disorders	Rate	1990	793.111
Deaths	China	Both	85 to 89	Neurological disorders	Rate	1990	1750.88
Deaths	China	Both	90 to 94	Neurological disorders	Rate	1990	3452.72
Deaths	China	Both	95 plus	Neurological disorders	Rate	1990	4889.75
Deaths	China	Both	<1 year	Non-communicable diseases	Rate	1990	692.935
Deaths	China	Both	1 to 4	Non-communicable diseases	Rate	1990	70.5308
Deaths	China	Both	10 to 14	Non-communicable diseases	Rate	1990	27.4538
Deaths	China	Both	15 to 19	Non-communicable diseases	Rate	1990	39.5389
Deaths	China	Both	20 to 24	Non-communicable diseases	Rate	1990	52.8846
Deaths	China	Both	25 to 29	Non-communicable diseases	Rate	1990	62.3609
Deaths	China	Both	30 to 34	Non-communicable diseases	Rate	1990	98.1254
Deaths	China	Both	35 to 39	Non-communicable diseases	Rate	1990	150.438
Deaths	China	Both	40 to 44	Non-communicable diseases	Rate	1990	246.201
Deaths	China	Both	45 to 49	Non-communicable diseases	Rate	1990	423.543
Deaths	China	Both	5 to 9	Non-communicable diseases	Rate	1990	27.6145
Deaths	China	Both	50 to 54	Non-communicable diseases	Rate	1990	707.135
Deaths	China	Both	55 to 59	Non-communicable diseases	Rate	1990	1161.51
Deaths	China	Both	60 to 64	Non-communicable diseases	Rate	1990	1997.05
Deaths	China	Both	65 to 69	Non-communicable diseases	Rate	1990	3199.3
Deaths	China	Both	70 to 74	Non-communicable diseases	Rate	1990	5370.19
Deaths	China	Both	75 to 79	Non-communicable diseases	Rate	1990	8006.85
Deaths	China	Both	80 to 84	Non-communicable diseases	Rate	1990	12061.7
Deaths	China	Both	85 to 89	Non-communicable diseases	Rate	1990	18040.3
Deaths	China	Both	90 to 94	Non-communicable diseases	Rate	1990	26249.5
Deaths	China	Both	95 plus	Non-communicable diseases	Rate	1990	39024.6
Deaths	China	Both	<1 year	Nutritional deficiencies	Rate	1990	71.2445
Deaths	China	Both	1 to 4	Nutritional deficiencies	Rate	1990	2.61234
Deaths	China	Both	10 to 14	Nutritional deficiencies	Rate	1990	0.415381
Deaths	China	Both	15 to 19	Nutritional deficiencies	Rate	1990	0.355704
Deaths	China	Both	20 to 24	Nutritional deficiencies	Rate	1990	0.355749
Deaths	China	Both	25 to 29	Nutritional deficiencies	Rate	1990	0.321259
Deaths	China	Both	30 to 34	Nutritional deficiencies	Rate	1990	0.371116
Deaths	China	Both	35 to 39	Nutritional deficiencies	Rate	1990	0.445348
Deaths	China	Both	40 to 44	Nutritional deficiencies	Rate	1990	0.537277
Deaths	China	Both	45 to 49	Nutritional deficiencies	Rate	1990	0.726271
Deaths	China	Both	5 to 9	Nutritional deficiencies	Rate	1990	0.666545
Deaths	China	Both	50 to 54	Nutritional deficiencies	Rate	1990	0.935015
Deaths	China	Both	55 to 59	Nutritional deficiencies	Rate	1990	1.34905
Deaths	China	Both	60 to 64	Nutritional deficiencies	Rate	1990	2.27526
Deaths	China	Both	65 to 69	Nutritional deficiencies	Rate	1990	3.69575
Deaths	China	Both	70 to 74	Nutritional deficiencies	Rate	1990	8.32743
Deaths	China	Both	75 to 79	Nutritional deficiencies	Rate	1990	17.9633
Deaths	China	Both	80 to 84	Nutritional deficiencies	Rate	1990	43.5267
Deaths	China	Both	85 to 89	Nutritional deficiencies	Rate	1990	94.3626
Deaths	China	Both	90 to 94	Nutritional deficiencies	Rate	1990	210.456
Deaths	China	Both	95 plus	Nutritional deficiencies	Rate	1990	544.675
Deaths	China	Both	<1 year	Other communicable, maternal, neonatal, and nutritional diseases	Rate	1990	27.2618
Deaths	China	Both	1 to 4	Other communicable, maternal, neonatal, and nutritional diseases	Rate	1990	2.54591
Deaths	China	Both	10 to 14	Other communicable, maternal, neonatal, and nutritional diseases	Rate	1990	0.589498
Deaths	China	Both	15 to 19	Other communicable, maternal, neonatal, and nutritional diseases	Rate	1990	0.745152
Deaths	China	Both	20 to 24	Other communicable, maternal, neonatal, and nutritional diseases	Rate	1990	1.17014
Deaths	China	Both	25 to 29	Other communicable, maternal, neonatal, and nutritional diseases	Rate	1990	1.5003
Deaths	China	Both	30 to 34	Other communicable, maternal, neonatal, and nutritional diseases	Rate	1990	2.35186
Deaths	China	Both	35 to 39	Other communicable, maternal, neonatal, and nutritional diseases	Rate	1990	3.17339
Deaths	China	Both	40 to 44	Other communicable, maternal, neonatal, and nutritional diseases	Rate	1990	4.01368
Deaths	China	Both	45 to 49	Other communicable, maternal, neonatal, and nutritional diseases	Rate	1990	5.35108
Deaths	China	Both	5 to 9	Other communicable, maternal, neonatal, and nutritional diseases	Rate	1990	0.871243
Deaths	China	Both	50 to 54	Other communicable, maternal, neonatal, and nutritional diseases	Rate	1990	6.10274
Deaths	China	Both	55 to 59	Other communicable, maternal, neonatal, and nutritional diseases	Rate	1990	6.82331
Deaths	China	Both	60 to 64	Other communicable, maternal, neonatal, and nutritional diseases	Rate	1990	8.09872
Deaths	China	Both	65 to 69	Other communicable, maternal, neonatal, and nutritional diseases	Rate	1990	11.3475
Deaths	China	Both	70 to 74	Other communicable, maternal, neonatal, and nutritional diseases	Rate	1990	13.7207
Deaths	China	Both	75 to 79	Other communicable, maternal, neonatal, and nutritional diseases	Rate	1990	16.0315
Deaths	China	Both	80 to 84	Other communicable, maternal, neonatal, and nutritional diseases	Rate	1990	17.049
Deaths	China	Both	85 to 89	Other communicable, maternal, neonatal, and nutritional diseases	Rate	1990	21.1007
Deaths	China	Both	90 to 94	Other communicable, maternal, neonatal, and nutritional diseases	Rate	1990	22.845
Deaths	China	Both	95 plus	Other communicable, maternal, neonatal, and nutritional diseases	Rate	1990	37.0861
Deaths	China	Both	<1 year	Other non-communicable diseases	Rate	1990	523.23
Deaths	China	Both	1 to 4	Other non-communicable diseases	Rate	1990	25.4426
Deaths	China	Both	10 to 14	Other non-communicable diseases	Rate	1990	3.64525
Deaths	China	Both	15 to 19	Other non-communicable diseases	Rate	1990	2.5462
Deaths	China	Both	20 to 24	Other non-communicable diseases	Rate	1990	2.06729
Deaths	China	Both	25 to 29	Other non-communicable diseases	Rate	1990	1.45673
Deaths	China	Both	30 to 34	Other non-communicable diseases	Rate	1990	1.04519
Deaths	China	Both	35 to 39	Other non-communicable diseases	Rate	1990	0.861268
Deaths	China	Both	40 to 44	Other non-communicable diseases	Rate	1990	0.730621
Deaths	China	Both	45 to 49	Other non-communicable diseases	Rate	1990	0.687168
Deaths	China	Both	5 to 9	Other non-communicable diseases	Rate	1990	4.90156
Deaths	China	Both	50 to 54	Other non-communicable diseases	Rate	1990	0.662946
Deaths	China	Both	55 to 59	Other non-communicable diseases	Rate	1990	0.769579
Deaths	China	Both	60 to 64	Other non-communicable diseases	Rate	1990	0.877733
Deaths	China	Both	65 to 69	Other non-communicable diseases	Rate	1990	1.25224
Deaths	China	Both	70 to 74	Other non-communicable diseases	Rate	1990	1.60843
Deaths	China	Both	75 to 79	Other non-communicable diseases	Rate	1990	3.26054
Deaths	China	Both	80 to 84	Other non-communicable diseases	Rate	1990	7.75432
Deaths	China	Both	85 to 89	Other non-communicable diseases	Rate	1990	16.1371
Deaths	China	Both	90 to 94	Other non-communicable diseases	Rate	1990	35.5546
Deaths	China	Both	95 plus	Other non-communicable diseases	Rate	1990	65.5838
Deaths	China	Both	<1 year	Self-harm and interpersonal violence	Rate	1990	16.3693
Deaths	China	Both	1 to 4	Self-harm and interpersonal violence	Rate	1990	3.88123
Deaths	China	Both	10 to 14	Self-harm and interpersonal violence	Rate	1990	7.35255
Deaths	China	Both	15 to 19	Self-harm and interpersonal violence	Rate	1990	20.3154
Deaths	China	Both	20 to 24	Self-harm and interpersonal violence	Rate	1990	33.6155
Deaths	China	Both	25 to 29	Self-harm and interpersonal violence	Rate	1990	31.3064
Deaths	China	Both	30 to 34	Self-harm and interpersonal violence	Rate	1990	30.2416
Deaths	China	Both	35 to 39	Self-harm and interpersonal violence	Rate	1990	28.4157
Deaths	China	Both	40 to 44	Self-harm and interpersonal violence	Rate	1990	26.6266
Deaths	China	Both	45 to 49	Self-harm and interpersonal violence	Rate	1990	29.0303
Deaths	China	Both	5 to 9	Self-harm and interpersonal violence	Rate	1990	2.40557
Deaths	China	Both	50 to 54	Self-harm and interpersonal violence	Rate	1990	31.0486
Deaths	China	Both	55 to 59	Self-harm and interpersonal violence	Rate	1990	34.1938
Deaths	China	Both	60 to 64	Self-harm and interpersonal violence	Rate	1990	39.9096
Deaths	China	Both	65 to 69	Self-harm and interpersonal violence	Rate	1990	49.5186
Deaths	China	Both	70 to 74	Self-harm and interpersonal violence	Rate	1990	68.1499
Deaths	China	Both	75 to 79	Self-harm and interpersonal violence	Rate	1990	82.6204
Deaths	China	Both	80 to 84	Self-harm and interpersonal violence	Rate	1990	99.7051
Deaths	China	Both	85 to 89	Self-harm and interpersonal violence	Rate	1990	105.624
Deaths	China	Both	90 to 94	Self-harm and interpersonal violence	Rate	1990	102.733
Deaths	China	Both	95 plus	Self-harm and interpersonal violence	Rate	1990	102.902
Deaths	China	Both	<1 year	Transport injuries	Rate	1990	18.1839
Deaths	China	Both	1 to 4	Transport injuries	Rate	1990	20.876
Deaths	China	Both	10 to 14	Transport injuries	Rate	1990	11.1307
Deaths	China	Both	15 to 19	Transport injuries	Rate	1990	19.277
Deaths	China	Both	20 to 24	Transport injuries	Rate	1990	27.3773
Deaths	China	Both	25 to 29	Transport injuries	Rate	1990	24.7193
Deaths	China	Both	30 to 34	Transport injuries	Rate	1990	26.8445
Deaths	China	Both	35 to 39	Transport injuries	Rate	1990	28.421
Deaths	China	Both	40 to 44	Transport injuries	Rate	1990	27.7527
Deaths	China	Both	45 to 49	Transport injuries	Rate	1990	28.9987
Deaths	China	Both	5 to 9	Transport injuries	Rate	1990	16.271
Deaths	China	Both	50 to 54	Transport injuries	Rate	1990	28.2224
Deaths	China	Both	55 to 59	Transport injuries	Rate	1990	31.0526
Deaths	China	Both	60 to 64	Transport injuries	Rate	1990	31.749
Deaths	China	Both	65 to 69	Transport injuries	Rate	1990	35.4317
Deaths	China	Both	70 to 74	Transport injuries	Rate	1990	40.6712
Deaths	China	Both	75 to 79	Transport injuries	Rate	1990	46.1921
Deaths	China	Both	80 to 84	Transport injuries	Rate	1990	47.2208
Deaths	China	Both	85 to 89	Transport injuries	Rate	1990	51.9582
Deaths	China	Both	90 to 94	Transport injuries	Rate	1990	53.1266
Deaths	China	Both	95 plus	Transport injuries	Rate	1990	75.5307
Deaths	China	Both	<1 year	Unintentional injuries	Rate	1990	165.102
Deaths	China	Both	1 to 4	Unintentional injuries	Rate	1990	93.035
Deaths	China	Both	10 to 14	Unintentional injuries	Rate	1990	32.5791
Deaths	China	Both	15 to 19	Unintentional injuries	Rate	1990	21.3443
Deaths	China	Both	20 to 24	Unintentional injuries	Rate	1990	21.3126
Deaths	China	Both	25 to 29	Unintentional injuries	Rate	1990	18.5443
Deaths	China	Both	30 to 34	Unintentional injuries	Rate	1990	20.0779
Deaths	China	Both	35 to 39	Unintentional injuries	Rate	1990	21.0628
Deaths	China	Both	40 to 44	Unintentional injuries	Rate	1990	22.8825
Deaths	China	Both	45 to 49	Unintentional injuries	Rate	1990	25.9039
Deaths	China	Both	5 to 9	Unintentional injuries	Rate	1990	41.9168
Deaths	China	Both	50 to 54	Unintentional injuries	Rate	1990	26.9187
Deaths	China	Both	55 to 59	Unintentional injuries	Rate	1990	30.063
Deaths	China	Both	60 to 64	Unintentional injuries	Rate	1990	35.4467
Deaths	China	Both	65 to 69	Unintentional injuries	Rate	1990	44.0986
Deaths	China	Both	70 to 74	Unintentional injuries	Rate	1990	62.5079
Deaths	China	Both	75 to 79	Unintentional injuries	Rate	1990	97.3323
Deaths	China	Both	80 to 84	Unintentional injuries	Rate	1990	171.594
Deaths	China	Both	85 to 89	Unintentional injuries	Rate	1990	299.993
Deaths	China	Both	90 to 94	Unintentional injuries	Rate	1990	470.078
Deaths	China	Both	95 plus	Unintentional injuries	Rate	1990	767.393
Deaths	China	Both	<1 year	Cardiovascular diseases	Rate	1991	69.8121
Deaths	China	Both	1 to 4	Cardiovascular diseases	Rate	1991	9.44555
Deaths	China	Both	10 to 14	Cardiovascular diseases	Rate	1991	4.6138
Deaths	China	Both	15 to 19	Cardiovascular diseases	Rate	1991	9.66931
Deaths	China	Both	20 to 24	Cardiovascular diseases	Rate	1991	15.9191
Deaths	China	Both	25 to 29	Cardiovascular diseases	Rate	1991	18.8391
Deaths	China	Both	30 to 34	Cardiovascular diseases	Rate	1991	26.9142
Deaths	China	Both	35 to 39	Cardiovascular diseases	Rate	1991	46.0368
Deaths	China	Both	40 to 44	Cardiovascular diseases	Rate	1991	79.499
Deaths	China	Both	45 to 49	Cardiovascular diseases	Rate	1991	141.487
Deaths	China	Both	5 to 9	Cardiovascular diseases	Rate	1991	4.25185
Deaths	China	Both	50 to 54	Cardiovascular diseases	Rate	1991	252.521
Deaths	China	Both	55 to 59	Cardiovascular diseases	Rate	1991	425.097
Deaths	China	Both	60 to 64	Cardiovascular diseases	Rate	1991	767.635
Deaths	China	Both	65 to 69	Cardiovascular diseases	Rate	1991	1282.28
Deaths	China	Both	70 to 74	Cardiovascular diseases	Rate	1991	2277.74
Deaths	China	Both	75 to 79	Cardiovascular diseases	Rate	1991	3468.63
Deaths	China	Both	80 to 84	Cardiovascular diseases	Rate	1991	5528
Deaths	China	Both	85 to 89	Cardiovascular diseases	Rate	1991	8318.91
Deaths	China	Both	90 to 94	Cardiovascular diseases	Rate	1991	12182.3
Deaths	China	Both	95 plus	Cardiovascular diseases	Rate	1991	18865.4
Deaths	China	Both	<1 year	Chronic respiratory diseases	Rate	1991	0
Deaths	China	Both	1 to 4	Chronic respiratory diseases	Rate	1991	3.06077
Deaths	China	Both	10 to 14	Chronic respiratory diseases	Rate	1991	1.04732
Deaths	China	Both	15 to 19	Chronic respiratory diseases	Rate	1991	2.37564
Deaths	China	Both	20 to 24	Chronic respiratory diseases	Rate	1991	3.38991
Deaths	China	Both	25 to 29	Chronic respiratory diseases	Rate	1991	4.55084
Deaths	China	Both	30 to 34	Chronic respiratory diseases	Rate	1991	6.74534
Deaths	China	Both	35 to 39	Chronic respiratory diseases	Rate	1991	10.856
Deaths	China	Both	40 to 44	Chronic respiratory diseases	Rate	1991	19.1826
Deaths	China	Both	45 to 49	Chronic respiratory diseases	Rate	1991	36.2563
Deaths	China	Both	5 to 9	Chronic respiratory diseases	Rate	1991	1.07402
Deaths	China	Both	50 to 54	Chronic respiratory diseases	Rate	1991	75.1885
Deaths	China	Both	55 to 59	Chronic respiratory diseases	Rate	1991	148.058
Deaths	China	Both	60 to 64	Chronic respiratory diseases	Rate	1991	338.663
Deaths	China	Both	65 to 69	Chronic respiratory diseases	Rate	1991	643.797
Deaths	China	Both	70 to 74	Chronic respiratory diseases	Rate	1991	1417.05
Deaths	China	Both	75 to 79	Chronic respiratory diseases	Rate	1991	2276.98
Deaths	China	Both	80 to 84	Chronic respiratory diseases	Rate	1991	3722.99
Deaths	China	Both	85 to 89	Chronic respiratory diseases	Rate	1991	5649.89
Deaths	China	Both	90 to 94	Chronic respiratory diseases	Rate	1991	7971.07
Deaths	China	Both	95 plus	Chronic respiratory diseases	Rate	1991	11748.1
Deaths	China	Both	1 to 4	Cirrhosis and other chronic liver diseases	Rate	1991	1.16831
Deaths	China	Both	10 to 14	Cirrhosis and other chronic liver diseases	Rate	1991	0.502228
Deaths	China	Both	15 to 19	Cirrhosis and other chronic liver diseases	Rate	1991	0.835842
Deaths	China	Both	20 to 24	Cirrhosis and other chronic liver diseases	Rate	1991	1.72584
Deaths	China	Both	25 to 29	Cirrhosis and other chronic liver diseases	Rate	1991	3.36486
Deaths	China	Both	30 to 34	Cirrhosis and other chronic liver diseases	Rate	1991	6.44797
Deaths	China	Both	35 to 39	Cirrhosis and other chronic liver diseases	Rate	1991	12.0555
Deaths	China	Both	40 to 44	Cirrhosis and other chronic liver diseases	Rate	1991	19.2766
Deaths	China	Both	45 to 49	Cirrhosis and other chronic liver diseases	Rate	1991	28.8416
Deaths	China	Both	5 to 9	Cirrhosis and other chronic liver diseases	Rate	1991	0.486456
Deaths	China	Both	50 to 54	Cirrhosis and other chronic liver diseases	Rate	1991	38.3803
Deaths	China	Both	55 to 59	Cirrhosis and other chronic liver diseases	Rate	1991	46.9543
Deaths	China	Both	60 to 64	Cirrhosis and other chronic liver diseases	Rate	1991	59.0835
Deaths	China	Both	65 to 69	Cirrhosis and other chronic liver diseases	Rate	1991	71.876
Deaths	China	Both	70 to 74	Cirrhosis and other chronic liver diseases	Rate	1991	87.9394
Deaths	China	Both	75 to 79	Cirrhosis and other chronic liver diseases	Rate	1991	101.961
Deaths	China	Both	80 to 84	Cirrhosis and other chronic liver diseases	Rate	1991	116.708
Deaths	China	Both	85 to 89	Cirrhosis and other chronic liver diseases	Rate	1991	129.37
Deaths	China	Both	90 to 94	Cirrhosis and other chronic liver diseases	Rate	1991	132.096
Deaths	China	Both	95 plus	Cirrhosis and other chronic liver diseases	Rate	1991	167.086
Deaths	China	Both	<1 year	Communicable, maternal, neonatal, and nutritional diseases	Rate	1991	3266.78
Deaths	China	Both	1 to 4	Communicable, maternal, neonatal, and nutritional diseases	Rate	1991	127.595
Deaths	China	Both	10 to 14	Communicable, maternal, neonatal, and nutritional diseases	Rate	1991	10.4321
Deaths	China	Both	15 to 19	Communicable, maternal, neonatal, and nutritional diseases	Rate	1991	10.3184
Deaths	China	Both	20 to 24	Communicable, maternal, neonatal, and nutritional diseases	Rate	1991	16.0167
Deaths	China	Both	25 to 29	Communicable, maternal, neonatal, and nutritional diseases	Rate	1991	17.4531
Deaths	China	Both	30 to 34	Communicable, maternal, neonatal, and nutritional diseases	Rate	1991	19.7698
Deaths	China	Both	35 to 39	Communicable, maternal, neonatal, and nutritional diseases	Rate	1991	22.6856
Deaths	China	Both	40 to 44	Communicable, maternal, neonatal, and nutritional diseases	Rate	1991	26.5051
Deaths	China	Both	45 to 49	Communicable, maternal, neonatal, and nutritional diseases	Rate	1991	34.1988
Deaths	China	Both	5 to 9	Communicable, maternal, neonatal, and nutritional diseases	Rate	1991	19.0839
Deaths	China	Both	50 to 54	Communicable, maternal, neonatal, and nutritional diseases	Rate	1991	45.3084
Deaths	China	Both	55 to 59	Communicable, maternal, neonatal, and nutritional diseases	Rate	1991	63.7975
Deaths	China	Both	60 to 64	Communicable, maternal, neonatal, and nutritional diseases	Rate	1991	99.1061
Deaths	China	Both	65 to 69	Communicable, maternal, neonatal, and nutritional diseases	Rate	1991	147.771
Deaths	China	Both	70 to 74	Communicable, maternal, neonatal, and nutritional diseases	Rate	1991	248.912
Deaths	China	Both	75 to 79	Communicable, maternal, neonatal, and nutritional diseases	Rate	1991	375.402
Deaths	China	Both	80 to 84	Communicable, maternal, neonatal, and nutritional diseases	Rate	1991	624.439
Deaths	China	Both	85 to 89	Communicable, maternal, neonatal, and nutritional diseases	Rate	1991	1007.82
Deaths	China	Both	90 to 94	Communicable, maternal, neonatal, and nutritional diseases	Rate	1991	1605.96
Deaths	China	Both	95 plus	Communicable, maternal, neonatal, and nutritional diseases	Rate	1991	2980.17
Deaths	China	Both	<1 year	Diabetes, urogenital, blood, and endocrine diseases	Rate	1991	35.0648
Deaths	China	Both	1 to 4	Diabetes, urogenital, blood, and endocrine diseases	Rate	1991	6.82377
Deaths	China	Both	10 to 14	Diabetes, urogenital, blood, and endocrine diseases	Rate	1991	2.75959
Deaths	China	Both	15 to 19	Diabetes, urogenital, blood, and endocrine diseases	Rate	1991	3.30625
Deaths	China	Both	20 to 24	Diabetes, urogenital, blood, and endocrine diseases	Rate	1991	5.05805
Deaths	China	Both	25 to 29	Diabetes, urogenital, blood, and endocrine diseases	Rate	1991	5.81991
Deaths	China	Both	30 to 34	Diabetes, urogenital, blood, and endocrine diseases	Rate	1991	7.16352
Deaths	China	Both	35 to 39	Diabetes, urogenital, blood, and endocrine diseases	Rate	1991	9.53148
Deaths	China	Both	40 to 44	Diabetes, urogenital, blood, and endocrine diseases	Rate	1991	12.5606
Deaths	China	Both	45 to 49	Diabetes, urogenital, blood, and endocrine diseases	Rate	1991	17.8283
Deaths	China	Both	5 to 9	Diabetes, urogenital, blood, and endocrine diseases	Rate	1991	2.73946
Deaths	China	Both	50 to 54	Diabetes, urogenital, blood, and endocrine diseases	Rate	1991	26.0335
Deaths	China	Both	55 to 59	Diabetes, urogenital, blood, and endocrine diseases	Rate	1991	40.5963
Deaths	China	Both	60 to 64	Diabetes, urogenital, blood, and endocrine diseases	Rate	1991	66.8126
Deaths	China	Both	65 to 69	Diabetes, urogenital, blood, and endocrine diseases	Rate	1991	102.382
Deaths	China	Both	70 to 74	Diabetes, urogenital, blood, and endocrine diseases	Rate	1991	156.532
Deaths	China	Both	75 to 79	Diabetes, urogenital, blood, and endocrine diseases	Rate	1991	223.384
Deaths	China	Both	80 to 84	Diabetes, urogenital, blood, and endocrine diseases	Rate	1991	296.341
Deaths	China	Both	85 to 89	Diabetes, urogenital, blood, and endocrine diseases	Rate	1991	418.498
Deaths	China	Both	90 to 94	Diabetes, urogenital, blood, and endocrine diseases	Rate	1991	584.043
Deaths	China	Both	95 plus	Diabetes, urogenital, blood, and endocrine diseases	Rate	1991	911.729
Deaths	China	Both	<1 year	Diarrhea, lower respiratory, and other common infectious diseases	Rate	1991	1446.31
Deaths	China	Both	1 to 4	Diarrhea, lower respiratory, and other common infectious diseases	Rate	1991	115.149
Deaths	China	Both	10 to 14	Diarrhea, lower respiratory, and other common infectious diseases	Rate	1991	7.05013
Deaths	China	Both	15 to 19	Diarrhea, lower respiratory, and other common infectious diseases	Rate	1991	4.86727
Deaths	China	Both	20 to 24	Diarrhea, lower respiratory, and other common infectious diseases	Rate	1991	4.34807
Deaths	China	Both	25 to 29	Diarrhea, lower respiratory, and other common infectious diseases	Rate	1991	4.20329
Deaths	China	Both	30 to 34	Diarrhea, lower respiratory, and other common infectious diseases	Rate	1991	4.51356
Deaths	China	Both	35 to 39	Diarrhea, lower respiratory, and other common infectious diseases	Rate	1991	4.86689
Deaths	China	Both	40 to 44	Diarrhea, lower respiratory, and other common infectious diseases	Rate	1991	6.19713
Deaths	China	Both	45 to 49	Diarrhea, lower respiratory, and other common infectious diseases	Rate	1991	8.4742
Deaths	China	Both	5 to 9	Diarrhea, lower respiratory, and other common infectious diseases	Rate	1991	15.2343
Deaths	China	Both	50 to 54	Diarrhea, lower respiratory, and other common infectious diseases	Rate	1991	11.8681
Deaths	China	Both	55 to 59	Diarrhea, lower respiratory, and other common infectious diseases	Rate	1991	17.3824
Deaths	China	Both	60 to 64	Diarrhea, lower respiratory, and other common infectious diseases	Rate	1991	30.1302
Deaths	China	Both	65 to 69	Diarrhea, lower respiratory, and other common infectious diseases	Rate	1991	51.312
Deaths	China	Both	70 to 74	Diarrhea, lower respiratory, and other common infectious diseases	Rate	1991	106.654
Deaths	China	Both	75 to 79	Diarrhea, lower respiratory, and other common infectious diseases	Rate	1991	190.749
Deaths	China	Both	80 to 84	Diarrhea, lower respiratory, and other common infectious diseases	Rate	1991	390.071
Deaths	China	Both	85 to 89	Diarrhea, lower respiratory, and other common infectious diseases	Rate	1991	688.97
Deaths	China	Both	90 to 94	Diarrhea, lower respiratory, and other common infectious diseases	Rate	1991	1175.14
Deaths	China	Both	95 plus	Diarrhea, lower respiratory, and other common infectious diseases	Rate	1991	2142.95
Deaths	China	Both	<1 year	Digestive diseases	Rate	1991	26.0955
Deaths	China	Both	1 to 4	Digestive diseases	Rate	1991	6.84857
Deaths	China	Both	10 to 14	Digestive diseases	Rate	1991	1.07711
Deaths	China	Both	15 to 19	Digestive diseases	Rate	1991	1.22827
Deaths	China	Both	20 to 24	Digestive diseases	Rate	1991	1.90885
Deaths	China	Both	25 to 29	Digestive diseases	Rate	1991	2.5268
Deaths	China	Both	30 to 34	Digestive diseases	Rate	1991	3.47486
Deaths	China	Both	35 to 39	Digestive diseases	Rate	1991	4.68286
Deaths	China	Both	40 to 44	Digestive diseases	Rate	1991	6.76826
Deaths	China	Both	45 to 49	Digestive diseases	Rate	1991	10.5288
Deaths	China	Both	5 to 9	Digestive diseases	Rate	1991	1.54286
Deaths	China	Both	50 to 54	Digestive diseases	Rate	1991	15.5898
Deaths	China	Both	55 to 59	Digestive diseases	Rate	1991	23.9299
Deaths	China	Both	60 to 64	Digestive diseases	Rate	1991	38.2479
Deaths	China	Both	65 to 69	Digestive diseases	Rate	1991	57.942
Deaths	China	Both	70 to 74	Digestive diseases	Rate	1991	98.0558
Deaths	China	Both	75 to 79	Digestive diseases	Rate	1991	152.154
Deaths	China	Both	80 to 84	Digestive diseases	Rate	1991	233.739
Deaths	China	Both	85 to 89	Digestive diseases	Rate	1991	351.653
Deaths	China	Both	90 to 94	Digestive diseases	Rate	1991	499.213
Deaths	China	Both	95 plus	Digestive diseases	Rate	1991	709.492
Deaths	China	Both	<1 year	Forces of nature, conflict and terrorism, and executions and police conflict	Rate	1991	0.349103
Deaths	China	Both	1 to 4	Forces of nature, conflict and terrorism, and executions and police conflict	Rate	1991	0.244501
Deaths	China	Both	10 to 14	Forces of nature, conflict and terrorism, and executions and police conflict	Rate	1991	0.223054
Deaths	China	Both	15 to 19	Forces of nature, conflict and terrorism, and executions and police conflict	Rate	1991	0.616332
Deaths	China	Both	20 to 24	Forces of nature, conflict and terrorism, and executions and police conflict	Rate	1991	2.08139
Deaths	China	Both	25 to 29	Forces of nature, conflict and terrorism, and executions and police conflict	Rate	1991	2.28307
Deaths	China	Both	30 to 34	Forces of nature, conflict and terrorism, and executions and police conflict	Rate	1991	1.87558
Deaths	China	Both	35 to 39	Forces of nature, conflict and terrorism, and executions and police conflict	Rate	1991	1.64089
Deaths	China	Both	40 to 44	Forces of nature, conflict and terrorism, and executions and police conflict	Rate	1991	0.943219
Deaths	China	Both	45 to 49	Forces of nature, conflict and terrorism, and executions and police conflict	Rate	1991	0.999786
Deaths	China	Both	5 to 9	Forces of nature, conflict and terrorism, and executions and police conflict	Rate	1991	0.195531
Deaths	China	Both	50 to 54	Forces of nature, conflict and terrorism, and executions and police conflict	Rate	1991	0.787287
Deaths	China	Both	55 to 59	Forces of nature, conflict and terrorism, and executions and police conflict	Rate	1991	0.539897
Deaths	China	Both	60 to 64	Forces of nature, conflict and terrorism, and executions and police conflict	Rate	1991	0.538931
Deaths	China	Both	65 to 69	Forces of nature, conflict and terrorism, and executions and police conflict	Rate	1991	0.543403
Deaths	China	Both	70 to 74	Forces of nature, conflict and terrorism, and executions and police conflict	Rate	1991	0.568111
Deaths	China	Both	75 to 79	Forces of nature, conflict and terrorism, and executions and police conflict	Rate	1991	0.555533
Deaths	China	Both	80 to 84	Forces of nature, conflict and terrorism, and executions and police conflict	Rate	1991	0.807579
Deaths	China	Both	85 to 89	Forces of nature, conflict and terrorism, and executions and police conflict	Rate	1991	0.770001
Deaths	China	Both	90 to 94	Forces of nature, conflict and terrorism, and executions and police conflict	Rate	1991	1.14078
Deaths	China	Both	95 plus	Forces of nature, conflict and terrorism, and executions and police conflict	Rate	1991	2.99298
Deaths	China	Both	<1 year	HIV/AIDS and tuberculosis	Rate	1991	6.95342
Deaths	China	Both	1 to 4	HIV/AIDS and tuberculosis	Rate	1991	2.75966
Deaths	China	Both	10 to 14	HIV/AIDS and tuberculosis	Rate	1991	1.48964
Deaths	China	Both	15 to 19	HIV/AIDS and tuberculosis	Rate	1991	2.47209
Deaths	China	Both	20 to 24	HIV/AIDS and tuberculosis	Rate	1991	4.5985
Deaths	China	Both	25 to 29	HIV/AIDS and tuberculosis	Rate	1991	5.42991
Deaths	China	Both	30 to 34	HIV/AIDS and tuberculosis	Rate	1991	7.22111
Deaths	China	Both	35 to 39	HIV/AIDS and tuberculosis	Rate	1991	9.53943
Deaths	China	Both	40 to 44	HIV/AIDS and tuberculosis	Rate	1991	13.0165
Deaths	China	Both	45 to 49	HIV/AIDS and tuberculosis	Rate	1991	17.751
Deaths	China	Both	5 to 9	HIV/AIDS and tuberculosis	Rate	1991	1.1258
Deaths	China	Both	50 to 54	HIV/AIDS and tuberculosis	Rate	1991	24.6283
Deaths	China	Both	55 to 59	HIV/AIDS and tuberculosis	Rate	1991	36.2752
Deaths	China	Both	60 to 64	HIV/AIDS and tuberculosis	Rate	1991	56.1809
Deaths	China	Both	65 to 69	HIV/AIDS and tuberculosis	Rate	1991	78.5923
Deaths	China	Both	70 to 74	HIV/AIDS and tuberculosis	Rate	1991	116.099
Deaths	China	Both	75 to 79	HIV/AIDS and tuberculosis	Rate	1991	146.643
Deaths	China	Both	80 to 84	HIV/AIDS and tuberculosis	Rate	1991	168.319
Deaths	China	Both	85 to 89	HIV/AIDS and tuberculosis	Rate	1991	194.755
Deaths	China	Both	90 to 94	HIV/AIDS and tuberculosis	Rate	1991	180.844
Deaths	China	Both	95 plus	HIV/AIDS and tuberculosis	Rate	1991	217.634
Deaths	China	Both	<1 year	Injuries	Rate	1991	194.998
Deaths	China	Both	1 to 4	Injuries	Rate	1991	113.087
Deaths	China	Both	10 to 14	Injuries	Rate	1991	46.3139
Deaths	China	Both	15 to 19	Injuries	Rate	1991	58.5001
Deaths	China	Both	20 to 24	Injuries	Rate	1991	84.7097
Deaths	China	Both	25 to 29	Injuries	Rate	1991	81.1155
Deaths	China	Both	30 to 34	Injuries	Rate	1991	77.3978
Deaths	China	Both	35 to 39	Injuries	Rate	1991	81.8407
Deaths	China	Both	40 to 44	Injuries	Rate	1991	80.0324
Deaths	China	Both	45 to 49	Injuries	Rate	1991	85.0398
Deaths	China	Both	5 to 9	Injuries	Rate	1991	56.6148
Deaths	China	Both	50 to 54	Injuries	Rate	1991	86.2514
Deaths	China	Both	55 to 59	Injuries	Rate	1991	93.8014
Deaths	China	Both	60 to 64	Injuries	Rate	1991	105.705
Deaths	China	Both	65 to 69	Injuries	Rate	1991	126.173
Deaths	China	Both	70 to 74	Injuries	Rate	1991	171.265
Deaths	China	Both	75 to 79	Injuries	Rate	1991	223.876
Deaths	China	Both	80 to 84	Injuries	Rate	1991	320.695
Deaths	China	Both	85 to 89	Injuries	Rate	1991	463.597
Deaths	China	Both	90 to 94	Injuries	Rate	1991	639.389
Deaths	China	Both	95 plus	Injuries	Rate	1991	966.392
Deaths	China	Both	10 to 14	Maternal disorders	Rate	1991	0.185389
Deaths	China	Both	15 to 19	Maternal disorders	Rate	1991	1.53555
Deaths	China	Both	20 to 24	Maternal disorders	Rate	1991	5.12536
Deaths	China	Both	25 to 29	Maternal disorders	Rate	1991	5.49594
Deaths	China	Both	30 to 34	Maternal disorders	Rate	1991	4.84657
Deaths	China	Both	35 to 39	Maternal disorders	Rate	1991	3.81834
Deaths	China	Both	40 to 44	Maternal disorders	Rate	1991	1.67199
Deaths	China	Both	45 to 49	Maternal disorders	Rate	1991	0.652018
Deaths	China	Both	50 to 54	Maternal disorders	Rate	1991	0.199781
Deaths	China	Both	<1 year	Mental disorders	Rate	1991	0.0261515
Deaths	China	Both	1 to 4	Mental disorders	Rate	1991	0
Deaths	China	Both	10 to 14	Mental disorders	Rate	1991	0.00471602
Deaths	China	Both	15 to 19	Mental disorders	Rate	1991	2.88463
Deaths	China	Both	20 to 24	Mental disorders	Rate	1991	4.75402
Deaths	China	Both	25 to 29	Mental disorders	Rate	1991	5.55028
Deaths	China	Both	30 to 34	Mental disorders	Rate	1991	5.73399
Deaths	China	Both	35 to 39	Mental disorders	Rate	1991	5.76893
Deaths	China	Both	40 to 44	Mental disorders	Rate	1991	5.91149
Deaths	China	Both	45 to 49	Mental disorders	Rate	1991	6.19603
Deaths	China	Both	5 to 9	Mental disorders	Rate	1991	0.00416449
Deaths	China	Both	50 to 54	Mental disorders	Rate	1991	6.41916
Deaths	China	Both	55 to 59	Mental disorders	Rate	1991	6.8972
Deaths	China	Both	60 to 64	Mental disorders	Rate	1991	8.24656
Deaths	China	Both	65 to 69	Mental disorders	Rate	1991	9.24642
Deaths	China	Both	70 to 74	Mental disorders	Rate	1991	11.9467
Deaths	China	Both	75 to 79	Mental disorders	Rate	1991	15.1845
Deaths	China	Both	80 to 84	Mental disorders	Rate	1991	17.2176
Deaths	China	Both	85 to 89	Mental disorders	Rate	1991	25.6272
Deaths	China	Both	90 to 94	Mental disorders	Rate	1991	37.3337
Deaths	China	Both	95 plus	Mental disorders	Rate	1991	53.8584
Deaths	China	Both	10 to 14	Musculoskeletal disorders	Rate	1991	0.413488
Deaths	China	Both	15 to 19	Musculoskeletal disorders	Rate	1991	0.741824
Deaths	China	Both	20 to 24	Musculoskeletal disorders	Rate	1991	0.932137
Deaths	China	Both	25 to 29	Musculoskeletal disorders	Rate	1991	0.896925
Deaths	China	Both	30 to 34	Musculoskeletal disorders	Rate	1991	0.786504
Deaths	China	Both	35 to 39	Musculoskeletal disorders	Rate	1991	0.904236
Deaths	China	Both	40 to 44	Musculoskeletal disorders	Rate	1991	1.01692
Deaths	China	Both	45 to 49	Musculoskeletal disorders	Rate	1991	1.1873
Deaths	China	Both	5 to 9	Musculoskeletal disorders	Rate	1991	0.234297
Deaths	China	Both	50 to 54	Musculoskeletal disorders	Rate	1991	1.55194
Deaths	China	Both	55 to 59	Musculoskeletal disorders	Rate	1991	1.97421
Deaths	China	Both	60 to 64	Musculoskeletal disorders	Rate	1991	3.18902
Deaths	China	Both	65 to 69	Musculoskeletal disorders	Rate	1991	4.87097
Deaths	China	Both	70 to 74	Musculoskeletal disorders	Rate	1991	7.348
Deaths	China	Both	75 to 79	Musculoskeletal disorders	Rate	1991	10.4409
Deaths	China	Both	80 to 84	Musculoskeletal disorders	Rate	1991	14.7147
Deaths	China	Both	85 to 89	Musculoskeletal disorders	Rate	1991	23.3065
Deaths	China	Both	90 to 94	Musculoskeletal disorders	Rate	1991	30.7703
Deaths	China	Both	95 plus	Musculoskeletal disorders	Rate	1991	46.9288
Deaths	China	Both	<1 year	Neglected tropical diseases and malaria	Rate	1991	3.67041
Deaths	China	Both	1 to 4	Neglected tropical diseases and malaria	Rate	1991	2.21714
Deaths	China	Both	10 to 14	Neglected tropical diseases and malaria	Rate	1991	0.763999
Deaths	China	Both	15 to 19	Neglected tropical diseases and malaria	Rate	1991	0.378905
Deaths	China	Both	20 to 24	Neglected tropical diseases and malaria	Rate	1991	0.387091
Deaths	China	Both	25 to 29	Neglected tropical diseases and malaria	Rate	1991	0.364517
Deaths	China	Both	30 to 34	Neglected tropical diseases and malaria	Rate	1991	0.50863
Deaths	China	Both	35 to 39	Neglected tropical diseases and malaria	Rate	1991	0.695013
Deaths	China	Both	40 to 44	Neglected tropical diseases and malaria	Rate	1991	0.896508
Deaths	China	Both	45 to 49	Neglected tropical diseases and malaria	Rate	1991	1.19955
Deaths	China	Both	5 to 9	Neglected tropical diseases and malaria	Rate	1991	1.21896
Deaths	China	Both	50 to 54	Neglected tropical diseases and malaria	Rate	1991	1.57563
Deaths	China	Both	55 to 59	Neglected tropical diseases and malaria	Rate	1991	2.08929
Deaths	China	Both	60 to 64	Neglected tropical diseases and malaria	Rate	1991	2.46381
Deaths	China	Both	65 to 69	Neglected tropical diseases and malaria	Rate	1991	2.9503
Deaths	China	Both	70 to 74	Neglected tropical diseases and malaria	Rate	1991	3.62825
Deaths	China	Both	75 to 79	Neglected tropical diseases and malaria	Rate	1991	3.66534
Deaths	China	Both	80 to 84	Neglected tropical diseases and malaria	Rate	1991	3.44966
Deaths	China	Both	85 to 89	Neglected tropical diseases and malaria	Rate	1991	3.55844
Deaths	China	Both	90 to 94	Neglected tropical diseases and malaria	Rate	1991	3.772
Deaths	China	Both	95 plus	Neglected tropical diseases and malaria	Rate	1991	5.7659
Deaths	China	Both	<1 year	Neonatal disorders	Rate	1991	1707.43
Deaths	China	Both	1 to 4	Neonatal disorders	Rate	1991	1.87345
Deaths	China	Both	<1 year	Neoplasms	Rate	1991	25.7031
Deaths	China	Both	1 to 4	Neoplasms	Rate	1991	13.8785
Deaths	China	Both	10 to 14	Neoplasms	Rate	1991	9.77548
Deaths	China	Both	15 to 19	Neoplasms	Rate	1991	12.0806
Deaths	China	Both	20 to 24	Neoplasms	Rate	1991	14.9988
Deaths	China	Both	25 to 29	Neoplasms	Rate	1991	20.9907
Deaths	China	Both	30 to 34	Neoplasms	Rate	1991	36.4914
Deaths	China	Both	35 to 39	Neoplasms	Rate	1991	62.9601
Deaths	China	Both	40 to 44	Neoplasms	Rate	1991	106.872
Deaths	China	Both	45 to 49	Neoplasms	Rate	1991	180.617
Deaths	China	Both	5 to 9	Neoplasms	Rate	1991	9.78354
Deaths	China	Both	50 to 54	Neoplasms	Rate	1991	278.307
Deaths	China	Both	55 to 59	Neoplasms	Rate	1991	427.291
Deaths	China	Both	60 to 64	Neoplasms	Rate	1991	642.798
Deaths	China	Both	65 to 69	Neoplasms	Rate	1991	866.474
Deaths	China	Both	70 to 74	Neoplasms	Rate	1991	1129.72
Deaths	China	Both	75 to 79	Neoplasms	Rate	1991	1267.26
Deaths	China	Both	80 to 84	Neoplasms	Rate	1991	1285.41
Deaths	China	Both	85 to 89	Neoplasms	Rate	1991	1424.31
Deaths	China	Both	90 to 94	Neoplasms	Rate	1991	1561.84
Deaths	China	Both	95 plus	Neoplasms	Rate	1991	1894.61
Deaths	China	Both	<1 year	Neurological disorders	Rate	1991	8.79672
Deaths	China	Both	1 to 4	Neurological disorders	Rate	1991	2.2427
Deaths	China	Both	10 to 14	Neurological disorders	Rate	1991	1.79932
Deaths	China	Both	15 to 19	Neurological disorders	Rate	1991	2.4576
Deaths	China	Both	20 to 24	Neurological disorders	Rate	1991	2.92909
Deaths	China	Both	25 to 29	Neurological disorders	Rate	1991	2.60195
Deaths	China	Both	30 to 34	Neurological disorders	Rate	1991	2.59467
Deaths	China	Both	35 to 39	Neurological disorders	Rate	1991	2.60266
Deaths	China	Both	40 to 44	Neurological disorders	Rate	1991	2.62244
Deaths	China	Both	45 to 49	Neurological disorders	Rate	1991	3.52933
Deaths	China	Both	5 to 9	Neurological disorders	Rate	1991	1.3633
Deaths	China	Both	50 to 54	Neurological disorders	Rate	1991	6.1232
Deaths	China	Both	55 to 59	Neurological disorders	Rate	1991	10.7938
Deaths	China	Both	60 to 64	Neurological disorders	Rate	1991	22.2286
Deaths	China	Both	65 to 69	Neurological disorders	Rate	1991	48.284
Deaths	China	Both	70 to 74	Neurological disorders	Rate	1991	119.562
Deaths	China	Both	75 to 79	Neurological disorders	Rate	1991	317.763
Deaths	China	Both	80 to 84	Neurological disorders	Rate	1991	787.111
Deaths	China	Both	85 to 89	Neurological disorders	Rate	1991	1744.38
Deaths	China	Both	90 to 94	Neurological disorders	Rate	1991	3452.99
Deaths	China	Both	95 plus	Neurological disorders	Rate	1991	4888.05
Deaths	China	Both	<1 year	Non-communicable diseases	Rate	1991	689.828
Deaths	China	Both	1 to 4	Non-communicable diseases	Rate	1991	68.6125
Deaths	China	Both	10 to 14	Non-communicable diseases	Rate	1991	25.431
Deaths	China	Both	15 to 19	Non-communicable diseases	Rate	1991	38.0959
Deaths	China	Both	20 to 24	Non-communicable diseases	Rate	1991	53.7731
Deaths	China	Both	25 to 29	Non-communicable diseases	Rate	1991	66.7288
Deaths	China	Both	30 to 34	Non-communicable diseases	Rate	1991	97.4076
Deaths	China	Both	35 to 39	Non-communicable diseases	Rate	1991	156.307
Deaths	China	Both	40 to 44	Non-communicable diseases	Rate	1991	254.474
Deaths	China	Both	45 to 49	Non-communicable diseases	Rate	1991	427.176
Deaths	China	Both	5 to 9	Non-communicable diseases	Rate	1991	26.2051
Deaths	China	Both	50 to 54	Non-communicable diseases	Rate	1991	700.785
Deaths	China	Both	55 to 59	Non-communicable diseases	Rate	1991	1132.36
Deaths	China	Both	60 to 64	Non-communicable diseases	Rate	1991	1947.78
Deaths	China	Both	65 to 69	Non-communicable diseases	Rate	1991	3088.41
Deaths	China	Both	70 to 74	Non-communicable diseases	Rate	1991	5307.54
Deaths	China	Both	75 to 79	Non-communicable diseases	Rate	1991	7837.06
Deaths	China	Both	80 to 84	Non-communicable diseases	Rate	1991	12010.1
Deaths	China	Both	85 to 89	Non-communicable diseases	Rate	1991	18102.2
Deaths	China	Both	90 to 94	Non-communicable diseases	Rate	1991	26487.6
Deaths	China	Both	95 plus	Non-communicable diseases	Rate	1991	39351.4
Deaths	China	Both	<1 year	Nutritional deficiencies	Rate	1991	75.7269
Deaths	China	Both	1 to 4	Nutritional deficiencies	Rate	1991	3.14622
Deaths	China	Both	10 to 14	Nutritional deficiencies	Rate	1991	0.402627
Deaths	China	Both	15 to 19	Nutritional deficiencies	Rate	1991	0.360725
Deaths	China	Both	20 to 24	Nutritional deficiencies	Rate	1991	0.386292
Deaths	China	Both	25 to 29	Nutritional deficiencies	Rate	1991	0.372754
Deaths	China	Both	30 to 34	Nutritional deficiencies	Rate	1991	0.399271
Deaths	China	Both	35 to 39	Nutritional deficiencies	Rate	1991	0.505234
Deaths	China	Both	40 to 44	Nutritional deficiencies	Rate	1991	0.601313
Deaths	China	Both	45 to 49	Nutritional deficiencies	Rate	1991	0.78821
Deaths	China	Both	5 to 9	Nutritional deficiencies	Rate	1991	0.680491
Deaths	China	Both	50 to 54	Nutritional deficiencies	Rate	1991	1.00602
Deaths	China	Both	55 to 59	Nutritional deficiencies	Rate	1991	1.42701
Deaths	China	Both	60 to 64	Nutritional deficiencies	Rate	1991	2.41136
Deaths	China	Both	65 to 69	Nutritional deficiencies	Rate	1991	3.86742
Deaths	China	Both	70 to 74	Nutritional deficiencies	Rate	1991	8.80845
Deaths	China	Both	75 to 79	Nutritional deficiencies	Rate	1991	18.4956
Deaths	China	Both	80 to 84	Nutritional deficiencies	Rate	1991	45.3676
Deaths	China	Both	85 to 89	Nutritional deficiencies	Rate	1991	99.0436
Deaths	China	Both	90 to 94	Nutritional deficiencies	Rate	1991	222.873
Deaths	China	Both	95 plus	Nutritional deficiencies	Rate	1991	575.985
Deaths	China	Both	<1 year	Other communicable, maternal, neonatal, and nutritional diseases	Rate	1991	26.69
Deaths	China	Both	1 to 4	Other communicable, maternal, neonatal, and nutritional diseases	Rate	1991	2.44929
Deaths	China	Both	10 to 14	Other communicable, maternal, neonatal, and nutritional diseases	Rate	1991	0.540351
Deaths	China	Both	15 to 19	Other communicable, maternal, neonatal, and nutritional diseases	Rate	1991	0.703858
Deaths	China	Both	20 to 24	Other communicable, maternal, neonatal, and nutritional diseases	Rate	1991	1.17143
Deaths	China	Both	25 to 29	Other communicable, maternal, neonatal, and nutritional diseases	Rate	1991	1.58665
Deaths	China	Both	30 to 34	Other communicable, maternal, neonatal, and nutritional diseases	Rate	1991	2.28066
Deaths	China	Both	35 to 39	Other communicable, maternal, neonatal, and nutritional diseases	Rate	1991	3.26069
Deaths	China	Both	40 to 44	Other communicable, maternal, neonatal, and nutritional diseases	Rate	1991	4.1217
Deaths	China	Both	45 to 49	Other communicable, maternal, neonatal, and nutritional diseases	Rate	1991	5.33383
Deaths	China	Both	5 to 9	Other communicable, maternal, neonatal, and nutritional diseases	Rate	1991	0.824339
Deaths	China	Both	50 to 54	Other communicable, maternal, neonatal, and nutritional diseases	Rate	1991	6.03044
Deaths	China	Both	55 to 59	Other communicable, maternal, neonatal, and nutritional diseases	Rate	1991	6.6236
Deaths	China	Both	60 to 64	Other communicable, maternal, neonatal, and nutritional diseases	Rate	1991	7.91987
Deaths	China	Both	65 to 69	Other communicable, maternal, neonatal, and nutritional diseases	Rate	1991	11.0493
Deaths	China	Both	70 to 74	Other communicable, maternal, neonatal, and nutritional diseases	Rate	1991	13.7222
Deaths	China	Both	75 to 79	Other communicable, maternal, neonatal, and nutritional diseases	Rate	1991	15.8484
Deaths	China	Both	80 to 84	Other communicable, maternal, neonatal, and nutritional diseases	Rate	1991	17.2321
Deaths	China	Both	85 to 89	Other communicable, maternal, neonatal, and nutritional diseases	Rate	1991	21.4957
Deaths	China	Both	90 to 94	Other communicable, maternal, neonatal, and nutritional diseases	Rate	1991	23.333
Deaths	China	Both	95 plus	Other communicable, maternal, neonatal, and nutritional diseases	Rate	1991	37.8346
Deaths	China	Both	<1 year	Other non-communicable diseases	Rate	1991	524.33
Deaths	China	Both	1 to 4	Other non-communicable diseases	Rate	1991	25.1444
Deaths	China	Both	10 to 14	Other non-communicable diseases	Rate	1991	3.43794
Deaths	China	Both	15 to 19	Other non-communicable diseases	Rate	1991	2.51596
Deaths	China	Both	20 to 24	Other non-communicable diseases	Rate	1991	2.15723
Deaths	China	Both	25 to 29	Other non-communicable diseases	Rate	1991	1.58751
Deaths	China	Both	30 to 34	Other non-communicable diseases	Rate	1991	1.05518
Deaths	China	Both	35 to 39	Other non-communicable diseases	Rate	1991	0.908767
Deaths	China	Both	40 to 44	Other non-communicable diseases	Rate	1991	0.76397
Deaths	China	Both	45 to 49	Other non-communicable diseases	Rate	1991	0.704159
Deaths	China	Both	5 to 9	Other non-communicable diseases	Rate	1991	4.72518
Deaths	China	Both	50 to 54	Other non-communicable diseases	Rate	1991	0.670663
Deaths	China	Both	55 to 59	Other non-communicable diseases	Rate	1991	0.769285
Deaths	China	Both	60 to 64	Other non-communicable diseases	Rate	1991	0.88127
Deaths	China	Both	65 to 69	Other non-communicable diseases	Rate	1991	1.25562
Deaths	China	Both	70 to 74	Other non-communicable diseases	Rate	1991	1.63806
Deaths	China	Both	75 to 79	Other non-communicable diseases	Rate	1991	3.30416
Deaths	China	Both	80 to 84	Other non-communicable diseases	Rate	1991	7.83631
Deaths	China	Both	85 to 89	Other non-communicable diseases	Rate	1991	16.2528
Deaths	China	Both	90 to 94	Other non-communicable diseases	Rate	1991	35.9377
Deaths	China	Both	95 plus	Other non-communicable diseases	Rate	1991	66.1747
Deaths	China	Both	<1 year	Self-harm and interpersonal violence	Rate	1991	16.2534
Deaths	China	Both	1 to 4	Self-harm and interpersonal violence	Rate	1991	3.75888
Deaths	China	Both	10 to 14	Self-harm and interpersonal violence	Rate	1991	6.80368
Deaths	China	Both	15 to 19	Self-harm and interpersonal violence	Rate	1991	19.4256
Deaths	China	Both	20 to 24	Self-harm and interpersonal violence	Rate	1991	33.6305
Deaths	China	Both	25 to 29	Self-harm and interpersonal violence	Rate	1991	32.9831
Deaths	China	Both	30 to 34	Self-harm and interpersonal violence	Rate	1991	29.7716
Deaths	China	Both	35 to 39	Self-harm and interpersonal violence	Rate	1991	29.1543
Deaths	China	Both	40 to 44	Self-harm and interpersonal violence	Rate	1991	27.1008
Deaths	China	Both	45 to 49	Self-harm and interpersonal violence	Rate	1991	29.2301
Deaths	China	Both	5 to 9	Self-harm and interpersonal violence	Rate	1991	2.27949
Deaths	China	Both	50 to 54	Self-harm and interpersonal violence	Rate	1991	31.1188
Deaths	China	Both	55 to 59	Self-harm and interpersonal violence	Rate	1991	34.0281
Deaths	China	Both	60 to 64	Self-harm and interpersonal violence	Rate	1991	39.903
Deaths	China	Both	65 to 69	Self-harm and interpersonal violence	Rate	1991	49.0214
Deaths	China	Both	70 to 74	Self-harm and interpersonal violence	Rate	1991	68.7958
Deaths	China	Both	75 to 79	Self-harm and interpersonal violence	Rate	1991	82.4846
Deaths	China	Both	80 to 84	Self-harm and interpersonal violence	Rate	1991	101.27
Deaths	China	Both	85 to 89	Self-harm and interpersonal violence	Rate	1991	108.194
Deaths	China	Both	90 to 94	Self-harm and interpersonal violence	Rate	1991	106.123
Deaths	China	Both	95 plus	Self-harm and interpersonal violence	Rate	1991	106.401
Deaths	China	Both	<1 year	Transport injuries	Rate	1991	17.7881
Deaths	China	Both	1 to 4	Transport injuries	Rate	1991	19.8871
Deaths	China	Both	10 to 14	Transport injuries	Rate	1991	9.98379
Deaths	China	Both	15 to 19	Transport injuries	Rate	1991	18.2121
Deaths	China	Both	20 to 24	Transport injuries	Rate	1991	27.5763
Deaths	China	Both	25 to 29	Transport injuries	Rate	1991	26.3202
Deaths	China	Both	30 to 34	Transport injuries	Rate	1991	26.1338
Deaths	China	Both	35 to 39	Transport injuries	Rate	1991	29.4576
Deaths	China	Both	40 to 44	Transport injuries	Rate	1991	28.6651
Deaths	China	Both	45 to 49	Transport injuries	Rate	1991	29.0555
Deaths	China	Both	5 to 9	Transport injuries	Rate	1991	15.0894
Deaths	China	Both	50 to 54	Transport injuries	Rate	1991	27.8496
Deaths	China	Both	55 to 59	Transport injuries	Rate	1991	30.0585
Deaths	China	Both	60 to 64	Transport injuries	Rate	1991	30.8042
Deaths	China	Both	65 to 69	Transport injuries	Rate	1991	34.0142
Deaths	China	Both	70 to 74	Transport injuries	Rate	1991	40.1597
Deaths	China	Both	75 to 79	Transport injuries	Rate	1991	45.3598
Deaths	China	Both	80 to 84	Transport injuries	Rate	1991	47.2354
Deaths	China	Both	85 to 89	Transport injuries	Rate	1991	52.3264
Deaths	China	Both	90 to 94	Transport injuries	Rate	1991	53.697
Deaths	China	Both	95 plus	Transport injuries	Rate	1991	76.3744
Deaths	China	Both	<1 year	Unintentional injuries	Rate	1991	160.607
Deaths	China	Both	1 to 4	Unintentional injuries	Rate	1991	89.1966
Deaths	China	Both	10 to 14	Unintentional injuries	Rate	1991	29.3034
Deaths	China	Both	15 to 19	Unintentional injuries	Rate	1991	20.2461
Deaths	China	Both	20 to 24	Unintentional injuries	Rate	1991	21.4215
Deaths	China	Both	25 to 29	Unintentional injuries	Rate	1991	19.5291
Deaths	China	Both	30 to 34	Unintentional injuries	Rate	1991	19.6169
Deaths	China	Both	35 to 39	Unintentional injuries	Rate	1991	21.5878
Deaths	China	Both	40 to 44	Unintentional injuries	Rate	1991	23.3233
Deaths	China	Both	45 to 49	Unintentional injuries	Rate	1991	25.7545
Deaths	China	Both	5 to 9	Unintentional injuries	Rate	1991	39.0504
Deaths	China	Both	50 to 54	Unintentional injuries	Rate	1991	26.4957
Deaths	China	Both	55 to 59	Unintentional injuries	Rate	1991	29.1749
Deaths	China	Both	60 to 64	Unintentional injuries	Rate	1991	34.4586
Deaths	China	Both	65 to 69	Unintentional injuries	Rate	1991	42.5938
Deaths	China	Both	70 to 74	Unintentional injuries	Rate	1991	61.7415
Deaths	China	Both	75 to 79	Unintentional injuries	Rate	1991	95.4756
Deaths	China	Both	80 to 84	Unintentional injuries	Rate	1991	171.383
Deaths	China	Both	85 to 89	Unintentional injuries	Rate	1991	302.307
Deaths	China	Both	90 to 94	Unintentional injuries	Rate	1991	478.427
Deaths	China	Both	95 plus	Unintentional injuries	Rate	1991	780.624
Deaths	China	Both	<1 year	Cardiovascular diseases	Rate	1992	68.4988
Deaths	China	Both	1 to 4	Cardiovascular diseases	Rate	1992	9.00924
Deaths	China	Both	10 to 14	Cardiovascular diseases	Rate	1992	4.28045
Deaths	China	Both	15 to 19	Cardiovascular diseases	Rate	1992	9.19372
Deaths	China	Both	20 to 24	Cardiovascular diseases	Rate	1992	15.7287
Deaths	China	Both	25 to 29	Cardiovascular diseases	Rate	1992	19.6075
Deaths	China	Both	30 to 34	Cardiovascular diseases	Rate	1992	26.9727
Deaths	China	Both	35 to 39	Cardiovascular diseases	Rate	1992	46.2059
Deaths	China	Both	40 to 44	Cardiovascular diseases	Rate	1992	81.9221
Deaths	China	Both	45 to 49	Cardiovascular diseases	Rate	1992	142.444
Deaths	China	Both	5 to 9	Cardiovascular diseases	Rate	1992	4.1164
Deaths	China	Both	50 to 54	Cardiovascular diseases	Rate	1992	252.949
Deaths	China	Both	55 to 59	Cardiovascular diseases	Rate	1992	417.044
Deaths	China	Both	60 to 64	Cardiovascular diseases	Rate	1992	767.079
Deaths	China	Both	65 to 69	Cardiovascular diseases	Rate	1992	1271.41
Deaths	China	Both	70 to 74	Cardiovascular diseases	Rate	1992	2286.76
Deaths	China	Both	75 to 79	Cardiovascular diseases	Rate	1992	3469.3
Deaths	China	Both	80 to 84	Cardiovascular diseases	Rate	1992	5595.58
Deaths	China	Both	85 to 89	Cardiovascular diseases	Rate	1992	8407.11
Deaths	China	Both	90 to 94	Cardiovascular diseases	Rate	1992	12282.9
Deaths	China	Both	95 plus	Cardiovascular diseases	Rate	1992	19012.5
Deaths	China	Both	<1 year	Chronic respiratory diseases	Rate	1992	0
Deaths	China	Both	1 to 4	Chronic respiratory diseases	Rate	1992	2.78534
Deaths	China	Both	10 to 14	Chronic respiratory diseases	Rate	1992	0.960235
Deaths	China	Both	15 to 19	Chronic respiratory diseases	Rate	1992	2.22555
Deaths	China	Both	20 to 24	Chronic respiratory diseases	Rate	1992	3.29498
Deaths	China	Both	25 to 29	Chronic respiratory diseases	Rate	1992	4.60215
Deaths	China	Both	30 to 34	Chronic respiratory diseases	Rate	1992	6.57374
Deaths	China	Both	35 to 39	Chronic respiratory diseases	Rate	1992	10.5308
Deaths	China	Both	40 to 44	Chronic respiratory diseases	Rate	1992	19.1244
Deaths	China	Both	45 to 49	Chronic respiratory diseases	Rate	1992	35.4256
Deaths	China	Both	5 to 9	Chronic respiratory diseases	Rate	1992	1.0174
Deaths	China	Both	50 to 54	Chronic respiratory diseases	Rate	1992	73.6385
Deaths	China	Both	55 to 59	Chronic respiratory diseases	Rate	1992	143.157
Deaths	China	Both	60 to 64	Chronic respiratory diseases	Rate	1992	335.668
Deaths	China	Both	65 to 69	Chronic respiratory diseases	Rate	1992	635.543
Deaths	China	Both	70 to 74	Chronic respiratory diseases	Rate	1992	1422.93
Deaths	China	Both	75 to 79	Chronic respiratory diseases	Rate	1992	2284.18
Deaths	China	Both	80 to 84	Chronic respiratory diseases	Rate	1992	3808.09
Deaths	China	Both	85 to 89	Chronic respiratory diseases	Rate	1992	5771.28
Deaths	China	Both	90 to 94	Chronic respiratory diseases	Rate	1992	8134.62
Deaths	China	Both	95 plus	Chronic respiratory diseases	Rate	1992	11977.3
Deaths	China	Both	1 to 4	Cirrhosis and other chronic liver diseases	Rate	1992	1.10424
Deaths	China	Both	10 to 14	Cirrhosis and other chronic liver diseases	Rate	1992	0.469761
Deaths	China	Both	15 to 19	Cirrhosis and other chronic liver diseases	Rate	1992	0.807023
Deaths	China	Both	20 to 24	Cirrhosis and other chronic liver diseases	Rate	1992	1.74806
Deaths	China	Both	25 to 29	Cirrhosis and other chronic liver diseases	Rate	1992	3.52984
Deaths	China	Both	30 to 34	Cirrhosis and other chronic liver diseases	Rate	1992	6.54605
Deaths	China	Both	35 to 39	Cirrhosis and other chronic liver diseases	Rate	1992	12.1198
Deaths	China	Both	40 to 44	Cirrhosis and other chronic liver diseases	Rate	1992	19.683
Deaths	China	Both	45 to 49	Cirrhosis and other chronic liver diseases	Rate	1992	28.8221
Deaths	China	Both	5 to 9	Cirrhosis and other chronic liver diseases	Rate	1992	0.468085
Deaths	China	Both	50 to 54	Cirrhosis and other chronic liver diseases	Rate	1992	38.6237
Deaths	China	Both	55 to 59	Cirrhosis and other chronic liver diseases	Rate	1992	46.4172
Deaths	China	Both	60 to 64	Cirrhosis and other chronic liver diseases	Rate	1992	59.2251
Deaths	China	Both	65 to 69	Cirrhosis and other chronic liver diseases	Rate	1992	71.5407
Deaths	China	Both	70 to 74	Cirrhosis and other chronic liver diseases	Rate	1992	88.9242
Deaths	China	Both	75 to 79	Cirrhosis and other chronic liver diseases	Rate	1992	103.005
Deaths	China	Both	80 to 84	Cirrhosis and other chronic liver diseases	Rate	1992	119.713
Deaths	China	Both	85 to 89	Cirrhosis and other chronic liver diseases	Rate	1992	132.67
Deaths	China	Both	90 to 94	Cirrhosis and other chronic liver diseases	Rate	1992	134.941
Deaths	China	Both	95 plus	Cirrhosis and other chronic liver diseases	Rate	1992	170.639
Deaths	China	Both	<1 year	Communicable, maternal, neonatal, and nutritional diseases	Rate	1992	3141.52
Deaths	China	Both	1 to 4	Communicable, maternal, neonatal, and nutritional diseases	Rate	1992	117.726
Deaths	China	Both	10 to 14	Communicable, maternal, neonatal, and nutritional diseases	Rate	1992	9.55359
Deaths	China	Both	15 to 19	Communicable, maternal, neonatal, and nutritional diseases	Rate	1992	9.55945
Deaths	China	Both	20 to 24	Communicable, maternal, neonatal, and nutritional diseases	Rate	1992	15.2711
Deaths	China	Both	25 to 29	Communicable, maternal, neonatal, and nutritional diseases	Rate	1992	17.1534
Deaths	China	Both	30 to 34	Communicable, maternal, neonatal, and nutritional diseases	Rate	1992	18.7008
Deaths	China	Both	35 to 39	Communicable, maternal, neonatal, and nutritional diseases	Rate	1992	21.505
Deaths	China	Both	40 to 44	Communicable, maternal, neonatal, and nutritional diseases	Rate	1992	25.5122
Deaths	China	Both	45 to 49	Communicable, maternal, neonatal, and nutritional diseases	Rate	1992	32.0993
Deaths	China	Both	5 to 9	Communicable, maternal, neonatal, and nutritional diseases	Rate	1992	17.9172
Deaths	China	Both	50 to 54	Communicable, maternal, neonatal, and nutritional diseases	Rate	1992	42.7844
Deaths	China	Both	55 to 59	Communicable, maternal, neonatal, and nutritional diseases	Rate	1992	59.4665
Deaths	China	Both	60 to 64	Communicable, maternal, neonatal, and nutritional diseases	Rate	1992	94.4871
Deaths	China	Both	65 to 69	Communicable, maternal, neonatal, and nutritional diseases	Rate	1992	140.679
Deaths	China	Both	70 to 74	Communicable, maternal, neonatal, and nutritional diseases	Rate	1992	239.044
Deaths	China	Both	75 to 79	Communicable, maternal, neonatal, and nutritional diseases	Rate	1992	362.577
Deaths	China	Both	80 to 84	Communicable, maternal, neonatal, and nutritional diseases	Rate	1992	617.264
Deaths	China	Both	85 to 89	Communicable, maternal, neonatal, and nutritional diseases	Rate	1992	1000.07
Deaths	China	Both	90 to 94	Communicable, maternal, neonatal, and nutritional diseases	Rate	1992	1599.62
Deaths	China	Both	95 plus	Communicable, maternal, neonatal, and nutritional diseases	Rate	1992	2973.64
Deaths	China	Both	<1 year	Diabetes, urogenital, blood, and endocrine diseases	Rate	1992	34.4021
Deaths	China	Both	1 to 4	Diabetes, urogenital, blood, and endocrine diseases	Rate	1992	6.49678
Deaths	China	Both	10 to 14	Diabetes, urogenital, blood, and endocrine diseases	Rate	1992	2.56095
Deaths	China	Both	15 to 19	Diabetes, urogenital, blood, and endocrine diseases	Rate	1992	3.14672
Deaths	China	Both	20 to 24	Diabetes, urogenital, blood, and endocrine diseases	Rate	1992	5.02255
Deaths	China	Both	25 to 29	Diabetes, urogenital, blood, and endocrine diseases	Rate	1992	5.99117
Deaths	China	Both	30 to 34	Diabetes, urogenital, blood, and endocrine diseases	Rate	1992	7.13611
Deaths	China	Both	35 to 39	Diabetes, urogenital, blood, and endocrine diseases	Rate	1992	9.54681
Deaths	China	Both	40 to 44	Diabetes, urogenital, blood, and endocrine diseases	Rate	1992	12.8342
Deaths	China	Both	45 to 49	Diabetes, urogenital, blood, and endocrine diseases	Rate	1992	17.9607
Deaths	China	Both	5 to 9	Diabetes, urogenital, blood, and endocrine diseases	Rate	1992	2.62531
Deaths	China	Both	50 to 54	Diabetes, urogenital, blood, and endocrine diseases	Rate	1992	26.1356
Deaths	China	Both	55 to 59	Diabetes, urogenital, blood, and endocrine diseases	Rate	1992	40.055
Deaths	China	Both	60 to 64	Diabetes, urogenital, blood, and endocrine diseases	Rate	1992	67.39
Deaths	China	Both	65 to 69	Diabetes, urogenital, blood, and endocrine diseases	Rate	1992	102.432
Deaths	China	Both	70 to 74	Diabetes, urogenital, blood, and endocrine diseases	Rate	1992	159.448
Deaths	China	Both	75 to 79	Diabetes, urogenital, blood, and endocrine diseases	Rate	1992	226.045
Deaths	China	Both	80 to 84	Diabetes, urogenital, blood, and endocrine diseases	Rate	1992	304.484
Deaths	China	Both	85 to 89	Diabetes, urogenital, blood, and endocrine diseases	Rate	1992	429.226
Deaths	China	Both	90 to 94	Diabetes, urogenital, blood, and endocrine diseases	Rate	1992	597.161
Deaths	China	Both	95 plus	Diabetes, urogenital, blood, and endocrine diseases	Rate	1992	932.575
Deaths	China	Both	<1 year	Diarrhea, lower respiratory, and other common infectious diseases	Rate	1992	1381.9
Deaths	China	Both	1 to 4	Diarrhea, lower respiratory, and other common infectious diseases	Rate	1992	106.774
Deaths	China	Both	10 to 14	Diarrhea, lower respiratory, and other common infectious diseases	Rate	1992	6.57791
Deaths	China	Both	15 to 19	Diarrhea, lower respiratory, and other common infectious diseases	Rate	1992	4.63195
Deaths	China	Both	20 to 24	Diarrhea, lower respiratory, and other common infectious diseases	Rate	1992	4.26029
Deaths	China	Both	25 to 29	Diarrhea, lower respiratory, and other common infectious diseases	Rate	1992	4.21059
Deaths	China	Both	30 to 34	Diarrhea, lower respiratory, and other common infectious diseases	Rate	1992	4.36885
Deaths	China	Both	35 to 39	Diarrhea, lower respiratory, and other common infectious diseases	Rate	1992	4.7123
Deaths	China	Both	40 to 44	Diarrhea, lower respiratory, and other common infectious diseases	Rate	1992	6.04829
Deaths	China	Both	45 to 49	Diarrhea, lower respiratory, and other common infectious diseases	Rate	1992	8.15008
Deaths	China	Both	5 to 9	Diarrhea, lower respiratory, and other common infectious diseases	Rate	1992	14.4275
Deaths	China	Both	50 to 54	Diarrhea, lower respiratory, and other common infectious diseases	Rate	1992	11.5131
Deaths	China	Both	55 to 59	Diarrhea, lower respiratory, and other common infectious diseases	Rate	1992	16.7506
Deaths	China	Both	60 to 64	Diarrhea, lower respiratory, and other common infectious diseases	Rate	1992	29.6227
Deaths	China	Both	65 to 69	Diarrhea, lower respiratory, and other common infectious diseases	Rate	1992	50.2505
Deaths	China	Both	70 to 74	Diarrhea, lower respiratory, and other common infectious diseases	Rate	1992	105.799
Deaths	China	Both	75 to 79	Diarrhea, lower respiratory, and other common infectious diseases	Rate	1992	188.722
Deaths	China	Both	80 to 84	Diarrhea, lower respiratory, and other common infectious diseases	Rate	1992	392.299
Deaths	China	Both	85 to 89	Diarrhea, lower respiratory, and other common infectious diseases	Rate	1992	693.735
Deaths	China	Both	90 to 94	Diarrhea, lower respiratory, and other common infectious diseases	Rate	1992	1185.12
Deaths	China	Both	95 plus	Diarrhea, lower respiratory, and other common infectious diseases	Rate	1992	2164.6
Deaths	China	Both	<1 year	Digestive diseases	Rate	1992	23.8057
Deaths	China	Both	1 to 4	Digestive diseases	Rate	1992	6.15661
Deaths	China	Both	10 to 14	Digestive diseases	Rate	1992	0.991539
Deaths	China	Both	15 to 19	Digestive diseases	Rate	1992	1.15536
Deaths	China	Both	20 to 24	Digestive diseases	Rate	1992	1.86662
Deaths	China	Both	25 to 29	Digestive diseases	Rate	1992	2.54167
Deaths	China	Both	30 to 34	Digestive diseases	Rate	1992	3.39791
Deaths	China	Both	35 to 39	Digestive diseases	Rate	1992	4.5755
Deaths	China	Both	40 to 44	Digestive diseases	Rate	1992	6.73392
Deaths	China	Both	45 to 49	Digestive diseases	Rate	1992	10.2275
Deaths	China	Both	5 to 9	Digestive diseases	Rate	1992	1.46067
Deaths	China	Both	50 to 54	Digestive diseases	Rate	1992	15.2222
Deaths	China	Both	55 to 59	Digestive diseases	Rate	1992	23.1443
Deaths	China	Both	60 to 64	Digestive diseases	Rate	1992	37.5829
Deaths	China	Both	65 to 69	Digestive diseases	Rate	1992	56.7336
Deaths	China	Both	70 to 74	Digestive diseases	Rate	1992	96.8584
Deaths	China	Both	75 to 79	Digestive diseases	Rate	1992	149.553
Deaths	China	Both	80 to 84	Digestive diseases	Rate	1992	232.918
Deaths	China	Both	85 to 89	Digestive diseases	Rate	1992	351.017
Deaths	China	Both	90 to 94	Digestive diseases	Rate	1992	497.965
Deaths	China	Both	95 plus	Digestive diseases	Rate	1992	708.2
Deaths	China	Both	<1 year	Forces of nature, conflict and terrorism, and executions and police conflict	Rate	1992	0.270148
Deaths	China	Both	1 to 4	Forces of nature, conflict and terrorism, and executions and police conflict	Rate	1992	0.169222
Deaths	China	Both	10 to 14	Forces of nature, conflict and terrorism, and executions and police conflict	Rate	1992	0.153407
Deaths	China	Both	15 to 19	Forces of nature, conflict and terrorism, and executions and police conflict	Rate	1992	0.519021
Deaths	China	Both	20 to 24	Forces of nature, conflict and terrorism, and executions and police conflict	Rate	1992	1.98211
Deaths	China	Both	25 to 29	Forces of nature, conflict and terrorism, and executions and police conflict	Rate	1992	2.22375
Deaths	China	Both	30 to 34	Forces of nature, conflict and terrorism, and executions and police conflict	Rate	1992	1.79927
Deaths	China	Both	35 to 39	Forces of nature, conflict and terrorism, and executions and police conflict	Rate	1992	1.56442
Deaths	China	Both	40 to 44	Forces of nature, conflict and terrorism, and executions and police conflict	Rate	1992	0.881928
Deaths	China	Both	45 to 49	Forces of nature, conflict and terrorism, and executions and police conflict	Rate	1992	0.893081
Deaths	China	Both	5 to 9	Forces of nature, conflict and terrorism, and executions and police conflict	Rate	1992	0.141149
Deaths	China	Both	50 to 54	Forces of nature, conflict and terrorism, and executions and police conflict	Rate	1992	0.695829
Deaths	China	Both	55 to 59	Forces of nature, conflict and terrorism, and executions and police conflict	Rate	1992	0.439077
Deaths	China	Both	60 to 64	Forces of nature, conflict and terrorism, and executions and police conflict	Rate	1992	0.424603
Deaths	China	Both	65 to 69	Forces of nature, conflict and terrorism, and executions and police conflict	Rate	1992	0.419059
Deaths	China	Both	70 to 74	Forces of nature, conflict and terrorism, and executions and police conflict	Rate	1992	0.41843
Deaths	China	Both	75 to 79	Forces of nature, conflict and terrorism, and executions and police conflict	Rate	1992	0.376388
Deaths	China	Both	80 to 84	Forces of nature, conflict and terrorism, and executions and police conflict	Rate	1992	0.578805
Deaths	China	Both	85 to 89	Forces of nature, conflict and terrorism, and executions and police conflict	Rate	1992	0.507097
Deaths	China	Both	90 to 94	Forces of nature, conflict and terrorism, and executions and police conflict	Rate	1992	0.846802
Deaths	China	Both	95 plus	Forces of nature, conflict and terrorism, and executions and police conflict	Rate	1992	2.61734
Deaths	China	Both	<1 year	HIV/AIDS and tuberculosis	Rate	1992	6.41039
Deaths	China	Both	1 to 4	HIV/AIDS and tuberculosis	Rate	1992	2.42739
Deaths	China	Both	10 to 14	HIV/AIDS and tuberculosis	Rate	1992	1.29336
Deaths	China	Both	15 to 19	HIV/AIDS and tuberculosis	Rate	1992	2.23252
Deaths	China	Both	20 to 24	HIV/AIDS and tuberculosis	Rate	1992	4.35172
Deaths	China	Both	25 to 29	HIV/AIDS and tuberculosis	Rate	1992	5.3162
Deaths	China	Both	30 to 34	HIV/AIDS and tuberculosis	Rate	1992	6.847
Deaths	China	Both	35 to 39	HIV/AIDS and tuberculosis	Rate	1992	8.9869
Deaths	China	Both	40 to 44	HIV/AIDS and tuberculosis	Rate	1992	12.3775
Deaths	China	Both	45 to 49	HIV/AIDS and tuberculosis	Rate	1992	16.4188
Deaths	China	Both	5 to 9	HIV/AIDS and tuberculosis	Rate	1992	1.01101
Deaths	China	Both	50 to 54	HIV/AIDS and tuberculosis	Rate	1992	22.8235
Deaths	China	Both	55 to 59	HIV/AIDS and tuberculosis	Rate	1992	33.1139
Deaths	China	Both	60 to 64	HIV/AIDS and tuberculosis	Rate	1992	52.5079
Deaths	China	Both	65 to 69	HIV/AIDS and tuberculosis	Rate	1992	73.3527
Deaths	China	Both	70 to 74	HIV/AIDS and tuberculosis	Rate	1992	107.985
Deaths	China	Both	75 to 79	HIV/AIDS and tuberculosis	Rate	1992	137.385
Deaths	China	Both	80 to 84	HIV/AIDS and tuberculosis	Rate	1992	160.638
Deaths	China	Both	85 to 89	HIV/AIDS and tuberculosis	Rate	1992	185.727
Deaths	China	Both	90 to 94	HIV/AIDS and tuberculosis	Rate	1992	171.334
Deaths	China	Both	95 plus	HIV/AIDS and tuberculosis	Rate	1992	205.797
Deaths	China	Both	<1 year	Injuries	Rate	1992	187.914
Deaths	China	Both	1 to 4	Injuries	Rate	1992	106.462
Deaths	China	Both	10 to 14	Injuries	Rate	1992	43.2729
Deaths	China	Both	15 to 19	Injuries	Rate	1992	56.0078
Deaths	China	Both	20 to 24	Injuries	Rate	1992	83.7673
Deaths	China	Both	25 to 29	Injuries	Rate	1992	83.0553
Deaths	China	Both	30 to 34	Injuries	Rate	1992	77.2191
Deaths	China	Both	35 to 39	Injuries	Rate	1992	81.9178
Deaths	China	Both	40 to 44	Injuries	Rate	1992	81.3986
Deaths	China	Both	45 to 49	Injuries	Rate	1992	84.3421
Deaths	China	Both	5 to 9	Injuries	Rate	1992	54.4162
Deaths	China	Both	50 to 54	Injuries	Rate	1992	86.1621
Deaths	China	Both	55 to 59	Injuries	Rate	1992	92.6685
Deaths	China	Both	60 to 64	Injuries	Rate	1992	105.774
Deaths	China	Both	65 to 69	Injuries	Rate	1992	125.384
Deaths	China	Both	70 to 74	Injuries	Rate	1992	171.75
Deaths	China	Both	75 to 79	Injuries	Rate	1992	223.525
Deaths	China	Both	80 to 84	Injuries	Rate	1992	323.946
Deaths	China	Both	85 to 89	Injuries	Rate	1992	468.129
Deaths	China	Both	90 to 94	Injuries	Rate	1992	646.239
Deaths	China	Both	95 plus	Injuries	Rate	1992	978.058
Deaths	China	Both	10 to 14	Maternal disorders	Rate	1992	0.161166
Deaths	China	Both	15 to 19	Maternal disorders	Rate	1992	1.37018
Deaths	China	Both	20 to 24	Maternal disorders	Rate	1992	4.82044
Deaths	China	Both	25 to 29	Maternal disorders	Rate	1992	5.35513
Deaths	China	Both	30 to 34	Maternal disorders	Rate	1992	4.45236
Deaths	China	Both	35 to 39	Maternal disorders	Rate	1992	3.53743
Deaths	China	Both	40 to 44	Maternal disorders	Rate	1992	1.58483
Deaths	China	Both	45 to 49	Maternal disorders	Rate	1992	0.610295
Deaths	China	Both	50 to 54	Maternal disorders	Rate	1992	0.18295
Deaths	China	Both	<1 year	Mental disorders	Rate	1992	0.0261951
Deaths	China	Both	1 to 4	Mental disorders	Rate	1992	0
Deaths	China	Both	10 to 14	Mental disorders	Rate	1992	0.00453819
Deaths	China	Both	15 to 19	Mental disorders	Rate	1992	2.84138
Deaths	China	Both	20 to 24	Mental disorders	Rate	1992	4.82423
Deaths	China	Both	25 to 29	Mental disorders	Rate	1992	5.73207
Deaths	China	Both	30 to 34	Mental disorders	Rate	1992	5.80058
Deaths	China	Both	35 to 39	Mental disorders	Rate	1992	5.84092
Deaths	China	Both	40 to 44	Mental disorders	Rate	1992	6.01699
Deaths	China	Both	45 to 49	Mental disorders	Rate	1992	6.19753
Deaths	China	Both	5 to 9	Mental disorders	Rate	1992	0.00413606
Deaths	China	Both	50 to 54	Mental disorders	Rate	1992	6.48794
Deaths	China	Both	55 to 59	Mental disorders	Rate	1992	6.87679
Deaths	China	Both	60 to 64	Mental disorders	Rate	1992	8.31725
Deaths	China	Both	65 to 69	Mental disorders	Rate	1992	9.29054
Deaths	China	Both	70 to 74	Mental disorders	Rate	1992	11.9653
Deaths	China	Both	75 to 79	Mental disorders	Rate	1992	15.1519
Deaths	China	Both	80 to 84	Mental disorders	Rate	1992	17.4016
Deaths	China	Both	85 to 89	Mental disorders	Rate	1992	26.0309
Deaths	China	Both	90 to 94	Mental disorders	Rate	1992	37.881
Deaths	China	Both	95 plus	Mental disorders	Rate	1992	54.5613
Deaths	China	Both	10 to 14	Musculoskeletal disorders	Rate	1992	0.393969
Deaths	China	Both	15 to 19	Musculoskeletal disorders	Rate	1992	0.722756
Deaths	China	Both	20 to 24	Musculoskeletal disorders	Rate	1992	0.948182
Deaths	China	Both	25 to 29	Musculoskeletal disorders	Rate	1992	0.935864
Deaths	China	Both	30 to 34	Musculoskeletal disorders	Rate	1992	0.786719
Deaths	China	Both	35 to 39	Musculoskeletal disorders	Rate	1992	0.9096
Deaths	China	Both	40 to 44	Musculoskeletal disorders	Rate	1992	1.0404
Deaths	China	Both	45 to 49	Musculoskeletal disorders	Rate	1992	1.20041
Deaths	China	Both	5 to 9	Musculoskeletal disorders	Rate	1992	0.228145
Deaths	China	Both	50 to 54	Musculoskeletal disorders	Rate	1992	1.55159
Deaths	China	Both	55 to 59	Musculoskeletal disorders	Rate	1992	1.95179
Deaths	China	Both	60 to 64	Musculoskeletal disorders	Rate	1992	3.20466
Deaths	China	Both	65 to 69	Musculoskeletal disorders	Rate	1992	4.86443
Deaths	China	Both	70 to 74	Musculoskeletal disorders	Rate	1992	7.43499
Deaths	China	Both	75 to 79	Musculoskeletal disorders	Rate	1992	10.5103
Deaths	China	Both	80 to 84	Musculoskeletal disorders	Rate	1992	14.9905
Deaths	China	Both	85 to 89	Musculoskeletal disorders	Rate	1992	23.8014
Deaths	China	Both	90 to 94	Musculoskeletal disorders	Rate	1992	31.5435
Deaths	China	Both	95 plus	Musculoskeletal disorders	Rate	1992	48.1775
Deaths	China	Both	<1 year	Neglected tropical diseases and malaria	Rate	1992	3.45226
Deaths	China	Both	1 to 4	Neglected tropical diseases and malaria	Rate	1992	2.03879
Deaths	China	Both	10 to 14	Neglected tropical diseases and malaria	Rate	1992	0.683118
Deaths	China	Both	15 to 19	Neglected tropical diseases and malaria	Rate	1992	0.350125
Deaths	China	Both	20 to 24	Neglected tropical diseases and malaria	Rate	1992	0.369463
Deaths	China	Both	25 to 29	Neglected tropical diseases and malaria	Rate	1992	0.356133
Deaths	China	Both	30 to 34	Neglected tropical diseases and malaria	Rate	1992	0.482904
Deaths	China	Both	35 to 39	Neglected tropical diseases and malaria	Rate	1992	0.660128
Deaths	China	Both	40 to 44	Neglected tropical diseases and malaria	Rate	1992	0.866584
Deaths	China	Both	45 to 49	Neglected tropical diseases and malaria	Rate	1992	1.12844
Deaths	China	Both	5 to 9	Neglected tropical diseases and malaria	Rate	1992	1.11069
Deaths	China	Both	50 to 54	Neglected tropical diseases and malaria	Rate	1992	1.50198
Deaths	China	Both	55 to 59	Neglected tropical diseases and malaria	Rate	1992	1.95719
Deaths	China	Both	60 to 64	Neglected tropical diseases and malaria	Rate	1992	2.35868
Deaths	China	Both	65 to 69	Neglected tropical diseases and malaria	Rate	1992	2.79558
Deaths	China	Both	70 to 74	Neglected tropical diseases and malaria	Rate	1992	3.49195
Deaths	China	Both	75 to 79	Neglected tropical diseases and malaria	Rate	1992	3.52724
Deaths	China	Both	80 to 84	Neglected tropical diseases and malaria	Rate	1992	3.37389
Deaths	China	Both	85 to 89	Neglected tropical diseases and malaria	Rate	1992	3.47961
Deaths	China	Both	90 to 94	Neglected tropical diseases and malaria	Rate	1992	3.67297
Deaths	China	Both	95 plus	Neglected tropical diseases and malaria	Rate	1992	5.58634
Deaths	China	Both	<1 year	Neonatal disorders	Rate	1992	1656.26
Deaths	China	Both	1 to 4	Neonatal disorders	Rate	1992	1.78446
Deaths	China	Both	<1 year	Neoplasms	Rate	1992	25.3261
Deaths	China	Both	1 to 4	Neoplasms	Rate	1992	13.5265
Deaths	China	Both	10 to 14	Neoplasms	Rate	1992	9.41872
Deaths	China	Both	15 to 19	Neoplasms	Rate	1992	11.8247
Deaths	China	Both	20 to 24	Neoplasms	Rate	1992	15.0027
Deaths	China	Both	25 to 29	Neoplasms	Rate	1992	21.4129
Deaths	China	Both	30 to 34	Neoplasms	Rate	1992	36.3506
Deaths	China	Both	35 to 39	Neoplasms	Rate	1992	62.8081
Deaths	China	Both	40 to 44	Neoplasms	Rate	1992	108.235
Deaths	China	Both	45 to 49	Neoplasms	Rate	1992	180.056
Deaths	China	Both	5 to 9	Neoplasms	Rate	1992	9.57887
Deaths	China	Both	50 to 54	Neoplasms	Rate	1992	277.48
Deaths	China	Both	55 to 59	Neoplasms	Rate	1992	421.12
Deaths	China	Both	60 to 64	Neoplasms	Rate	1992	642.318
Deaths	China	Both	65 to 69	Neoplasms	Rate	1992	863.004
Deaths	China	Both	70 to 74	Neoplasms	Rate	1992	1137.09
Deaths	China	Both	75 to 79	Neoplasms	Rate	1992	1276.11
Deaths	China	Both	80 to 84	Neoplasms	Rate	1992	1306.49
Deaths	China	Both	85 to 89	Neoplasms	Rate	1992	1445.97
Deaths	China	Both	90 to 94	Neoplasms	Rate	1992	1581.38
Deaths	China	Both	95 plus	Neoplasms	Rate	1992	1917.86
Deaths	China	Both	<1 year	Neurological disorders	Rate	1992	8.79396
Deaths	China	Both	1 to 4	Neurological disorders	Rate	1992	2.22205
Deaths	China	Both	10 to 14	Neurological disorders	Rate	1992	1.74265
Deaths	China	Both	15 to 19	Neurological disorders	Rate	1992	2.42995
Deaths	China	Both	20 to 24	Neurological disorders	Rate	1992	2.95267
Deaths	China	Both	25 to 29	Neurological disorders	Rate	1992	2.68953
Deaths	China	Both	30 to 34	Neurological disorders	Rate	1992	2.63964
Deaths	China	Both	35 to 39	Neurological disorders	Rate	1992	2.64941
Deaths	China	Both	40 to 44	Neurological disorders	Rate	1992	2.69149
Deaths	China	Both	45 to 49	Neurological disorders	Rate	1992	3.57567
Deaths	China	Both	5 to 9	Neurological disorders	Rate	1992	1.35255
Deaths	China	Both	50 to 54	Neurological disorders	Rate	1992	6.17559
Deaths	China	Both	55 to 59	Neurological disorders	Rate	1992	10.801
Deaths	China	Both	60 to 64	Neurological disorders	Rate	1992	22.2699
Deaths	China	Both	65 to 69	Neurological disorders	Rate	1992	48.0664
Deaths	China	Both	70 to 74	Neurological disorders	Rate	1992	118.915
Deaths	China	Both	75 to 79	Neurological disorders	Rate	1992	314.774
Deaths	China	Both	80 to 84	Neurological disorders	Rate	1992	782.443
Deaths	China	Both	85 to 89	Neurological disorders	Rate	1992	1738.92
Deaths	China	Both	90 to 94	Neurological disorders	Rate	1992	3451.61
Deaths	China	Both	95 plus	Neurological disorders	Rate	1992	4889.83
Deaths	China	Both	<1 year	Non-communicable diseases	Rate	1992	685.212
Deaths	China	Both	1 to 4	Non-communicable diseases	Rate	1992	66.0052
Deaths	China	Both	10 to 14	Non-communicable diseases	Rate	1992	24.1131
Deaths	China	Both	15 to 19	Non-communicable diseases	Rate	1992	36.8042
Deaths	China	Both	20 to 24	Non-communicable diseases	Rate	1992	53.5747
Deaths	China	Both	25 to 29	Non-communicable diseases	Rate	1992	68.6929
Deaths	China	Both	30 to 34	Non-communicable diseases	Rate	1992	97.2675
Deaths	China	Both	35 to 39	Non-communicable diseases	Rate	1992	156.11
Deaths	China	Both	40 to 44	Non-communicable diseases	Rate	1992	259.071
Deaths	China	Both	45 to 49	Non-communicable diseases	Rate	1992	426.622
Deaths	China	Both	5 to 9	Non-communicable diseases	Rate	1992	25.5119
Deaths	China	Both	50 to 54	Non-communicable diseases	Rate	1992	698.938
Deaths	China	Both	55 to 59	Non-communicable diseases	Rate	1992	1111.33
Deaths	China	Both	60 to 64	Non-communicable diseases	Rate	1992	1943.93
Deaths	China	Both	65 to 69	Non-communicable diseases	Rate	1992	3064.12
Deaths	China	Both	70 to 74	Non-communicable diseases	Rate	1992	5331.89
Deaths	China	Both	75 to 79	Non-communicable diseases	Rate	1992	7851.84
Deaths	China	Both	80 to 84	Non-communicable diseases	Rate	1992	12189.9
Deaths	China	Both	85 to 89	Non-communicable diseases	Rate	1992	18342.3
Deaths	China	Both	90 to 94	Non-communicable diseases	Rate	1992	26786.6
Deaths	China	Both	95 plus	Non-communicable diseases	Rate	1992	39779.1
Deaths	China	Both	<1 year	Nutritional deficiencies	Rate	1992	68.4037
Deaths	China	Both	1 to 4	Nutritional deficiencies	Rate	1992	2.43749
Deaths	China	Both	10 to 14	Nutritional deficiencies	Rate	1992	0.350881
Deaths	China	Both	15 to 19	Nutritional deficiencies	Rate	1992	0.329372
Deaths	China	Both	20 to 24	Nutritional deficiencies	Rate	1992	0.365239
Deaths	China	Both	25 to 29	Nutritional deficiencies	Rate	1992	0.359861
Deaths	China	Both	30 to 34	Nutritional deficiencies	Rate	1992	0.367024
Deaths	China	Both	35 to 39	Nutritional deficiencies	Rate	1992	0.465854
Deaths	China	Both	40 to 44	Nutritional deficiencies	Rate	1992	0.560626
Deaths	China	Both	45 to 49	Nutritional deficiencies	Rate	1992	0.720676
Deaths	China	Both	5 to 9	Nutritional deficiencies	Rate	1992	0.605006
Deaths	China	Both	50 to 54	Nutritional deficiencies	Rate	1992	0.920351
Deaths	China	Both	55 to 59	Nutritional deficiencies	Rate	1992	1.29644
Deaths	China	Both	60 to 64	Nutritional deficiencies	Rate	1992	2.22027
Deaths	China	Both	65 to 69	Nutritional deficiencies	Rate	1992	3.5375
Deaths	China	Both	70 to 74	Nutritional deficiencies	Rate	1992	8.3702
Deaths	China	Both	75 to 79	Nutritional deficiencies	Rate	1992	17.7466
Deaths	China	Both	80 to 84	Nutritional deficiencies	Rate	1992	44.1846
Deaths	China	Both	85 to 89	Nutritional deficiencies	Rate	1992	96.0354
Deaths	China	Both	90 to 94	Nutritional deficiencies	Rate	1992	216.764
Deaths	China	Both	95 plus	Nutritional deficiencies	Rate	1992	560.803
Deaths	China	Both	<1 year	Other communicable, maternal, neonatal, and nutritional diseases	Rate	1992	25.0923
Deaths	China	Both	1 to 4	Other communicable, maternal, neonatal, and nutritional diseases	Rate	1992	2.26335
Deaths	China	Both	10 to 14	Other communicable, maternal, neonatal, and nutritional diseases	Rate	1992	0.487158
Deaths	China	Both	15 to 19	Other communicable, maternal, neonatal, and nutritional diseases	Rate	1992	0.645303
Deaths	China	Both	20 to 24	Other communicable, maternal, neonatal, and nutritional diseases	Rate	1992	1.10397
Deaths	China	Both	25 to 29	Other communicable, maternal, neonatal, and nutritional diseases	Rate	1992	1.55548
Deaths	China	Both	30 to 34	Other communicable, maternal, neonatal, and nutritional diseases	Rate	1992	2.18263
Deaths	China	Both	35 to 39	Other communicable, maternal, neonatal, and nutritional diseases	Rate	1992	3.14243
Deaths	China	Both	40 to 44	Other communicable, maternal, neonatal, and nutritional diseases	Rate	1992	4.07439
Deaths	China	Both	45 to 49	Other communicable, maternal, neonatal, and nutritional diseases	Rate	1992	5.07101
Deaths	China	Both	5 to 9	Other communicable, maternal, neonatal, and nutritional diseases	Rate	1992	0.762933
Deaths	China	Both	50 to 54	Other communicable, maternal, neonatal, and nutritional diseases	Rate	1992	5.84256
Deaths	China	Both	55 to 59	Other communicable, maternal, neonatal, and nutritional diseases	Rate	1992	6.34836
Deaths	China	Both	60 to 64	Other communicable, maternal, neonatal, and nutritional diseases	Rate	1992	7.77766
Deaths	China	Both	65 to 69	Other communicable, maternal, neonatal, and nutritional diseases	Rate	1992	10.7424
Deaths	China	Both	70 to 74	Other communicable, maternal, neonatal, and nutritional diseases	Rate	1992	13.3969
Deaths	China	Both	75 to 79	Other communicable, maternal, neonatal, and nutritional diseases	Rate	1992	15.1973
Deaths	China	Both	80 to 84	Other communicable, maternal, neonatal, and nutritional diseases	Rate	1992	16.769
Deaths	China	Both	85 to 89	Other communicable, maternal, neonatal, and nutritional diseases	Rate	1992	21.0928
Deaths	China	Both	90 to 94	Other communicable, maternal, neonatal, and nutritional diseases	Rate	1992	22.7284
Deaths	China	Both	95 plus	Other communicable, maternal, neonatal, and nutritional diseases	Rate	1992	36.8554
Deaths	China	Both	<1 year	Other non-communicable diseases	Rate	1992	524.359
Deaths	China	Both	1 to 4	Other non-communicable diseases	Rate	1992	24.7044
Deaths	China	Both	10 to 14	Other non-communicable diseases	Rate	1992	3.29026
Deaths	China	Both	15 to 19	Other non-communicable diseases	Rate	1992	2.45707
Deaths	China	Both	20 to 24	Other non-communicable diseases	Rate	1992	2.18604
Deaths	China	Both	25 to 29	Other non-communicable diseases	Rate	1992	1.6502
Deaths	China	Both	30 to 34	Other non-communicable diseases	Rate	1992	1.06341
Deaths	China	Both	35 to 39	Other non-communicable diseases	Rate	1992	0.923452
Deaths	China	Both	40 to 44	Other non-communicable diseases	Rate	1992	0.790068
Deaths	China	Both	45 to 49	Other non-communicable diseases	Rate	1992	0.712379
Deaths	China	Both	5 to 9	Other non-communicable diseases	Rate	1992	4.66031
Deaths	China	Both	50 to 54	Other non-communicable diseases	Rate	1992	0.673467
Deaths	China	Both	55 to 59	Other non-communicable diseases	Rate	1992	0.761209
Deaths	China	Both	60 to 64	Other non-communicable diseases	Rate	1992	0.878617
Deaths	China	Both	65 to 69	Other non-communicable diseases	Rate	1992	1.2383
Deaths	China	Both	70 to 74	Other non-communicable diseases	Rate	1992	1.57372
Deaths	China	Both	75 to 79	Other non-communicable diseases	Rate	1992	3.21309
Deaths	China	Both	80 to 84	Other non-communicable diseases	Rate	1992	7.79177
Deaths	China	Both	85 to 89	Other non-communicable diseases	Rate	1992	16.3195
Deaths	China	Both	90 to 94	Other non-communicable diseases	Rate	1992	36.6263
Deaths	China	Both	95 plus	Other non-communicable diseases	Rate	1992	67.4321
Deaths	China	Both	<1 year	Self-harm and interpersonal violence	Rate	1992	15.865
Deaths	China	Both	1 to 4	Self-harm and interpersonal violence	Rate	1992	3.53384
Deaths	China	Both	10 to 14	Self-harm and interpersonal violence	Rate	1992	6.48511
Deaths	China	Both	15 to 19	Self-harm and interpersonal violence	Rate	1992	18.5619
Deaths	China	Both	20 to 24	Self-harm and interpersonal violence	Rate	1992	32.9929
Deaths	China	Both	25 to 29	Self-harm and interpersonal violence	Rate	1992	33.4223
Deaths	China	Both	30 to 34	Self-harm and interpersonal violence	Rate	1992	29.3447
Deaths	China	Both	35 to 39	Self-harm and interpersonal violence	Rate	1992	28.7005
Deaths	China	Both	40 to 44	Self-harm and interpersonal violence	Rate	1992	27.1749
Deaths	China	Both	45 to 49	Self-harm and interpersonal violence	Rate	1992	28.9945
Deaths	China	Both	5 to 9	Self-harm and interpersonal violence	Rate	1992	2.17776
Deaths	China	Both	50 to 54	Self-harm and interpersonal violence	Rate	1992	30.9753
Deaths	China	Both	55 to 59	Self-harm and interpersonal violence	Rate	1992	33.7206
Deaths	China	Both	60 to 64	Self-harm and interpersonal violence	Rate	1992	40.1567
Deaths	China	Both	65 to 69	Self-harm and interpersonal violence	Rate	1992	48.775
Deaths	China	Both	70 to 74	Self-harm and interpersonal violence	Rate	1992	69.1353
Deaths	China	Both	75 to 79	Self-harm and interpersonal violence	Rate	1992	82.5122
Deaths	China	Both	80 to 84	Self-harm and interpersonal violence	Rate	1992	102.668
Deaths	China	Both	85 to 89	Self-harm and interpersonal violence	Rate	1992	110.028
Deaths	China	Both	90 to 94	Self-harm and interpersonal violence	Rate	1992	108.476
Deaths	China	Both	95 plus	Self-harm and interpersonal violence	Rate	1992	109.155
Deaths	China	Both	<1 year	Transport injuries	Rate	1992	17.1746
Deaths	China	Both	1 to 4	Transport injuries	Rate	1992	18.8432
Deaths	China	Both	10 to 14	Transport injuries	Rate	1992	9.4058
Deaths	China	Both	15 to 19	Transport injuries	Rate	1992	17.6678
Deaths	China	Both	20 to 24	Transport injuries	Rate	1992	27.6986
Deaths	China	Both	25 to 29	Transport injuries	Rate	1992	27.4802
Deaths	China	Both	30 to 34	Transport injuries	Rate	1992	26.5165
Deaths	China	Both	35 to 39	Transport injuries	Rate	1992	30.1182
Deaths	China	Both	40 to 44	Transport injuries	Rate	1992	29.839
Deaths	China	Both	45 to 49	Transport injuries	Rate	1992	29.1994
Deaths	China	Both	5 to 9	Transport injuries	Rate	1992	14.6687
Deaths	China	Both	50 to 54	Transport injuries	Rate	1992	28.2775
Deaths	China	Both	55 to 59	Transport injuries	Rate	1992	30.0222
Deaths	China	Both	60 to 64	Transport injuries	Rate	1992	31.1311
Deaths	China	Both	65 to 69	Transport injuries	Rate	1992	34.3104
Deaths	China	Both	70 to 74	Transport injuries	Rate	1992	40.9383
Deaths	China	Both	75 to 79	Transport injuries	Rate	1992	46.1963
Deaths	China	Both	80 to 84	Transport injuries	Rate	1992	48.7095
Deaths	China	Both	85 to 89	Transport injuries	Rate	1992	53.8459
Deaths	China	Both	90 to 94	Transport injuries	Rate	1992	54.9928
Deaths	China	Both	95 plus	Transport injuries	Rate	1992	78.3508
Deaths	China	Both	<1 year	Unintentional injuries	Rate	1992	154.604
Deaths	China	Both	1 to 4	Unintentional injuries	Rate	1992	83.9154
Deaths	China	Both	10 to 14	Unintentional injuries	Rate	1992	27.2286
Deaths	China	Both	15 to 19	Unintentional injuries	Rate	1992	19.259
Deaths	China	Both	20 to 24	Unintentional injuries	Rate	1992	21.0936
Deaths	China	Both	25 to 29	Unintentional injuries	Rate	1992	19.9291
Deaths	China	Both	30 to 34	Unintentional injuries	Rate	1992	19.5587
Deaths	China	Both	35 to 39	Unintentional injuries	Rate	1992	21.5347
Deaths	China	Both	40 to 44	Unintentional injuries	Rate	1992	23.5027
Deaths	China	Both	45 to 49	Unintentional injuries	Rate	1992	25.2551
Deaths	China	Both	5 to 9	Unintentional injuries	Rate	1992	37.4286
Deaths	China	Both	50 to 54	Unintentional injuries	Rate	1992	26.2135
Deaths	China	Both	55 to 59	Unintentional injuries	Rate	1992	28.4865
Deaths	China	Both	60 to 64	Unintentional injuries	Rate	1992	34.0617
Deaths	China	Both	65 to 69	Unintentional injuries	Rate	1992	41.88
Deaths	China	Both	70 to 74	Unintentional injuries	Rate	1992	61.2581
Deaths	China	Both	75 to 79	Unintentional injuries	Rate	1992	94.4397
Deaths	China	Both	80 to 84	Unintentional injuries	Rate	1992	171.989
Deaths	China	Both	85 to 89	Unintentional injuries	Rate	1992	303.748
Deaths	China	Both	90 to 94	Unintentional injuries	Rate	1992	481.923
Deaths	China	Both	95 plus	Unintentional injuries	Rate	1992	787.934
Deaths	China	Both	<1 year	Cardiovascular diseases	Rate	1993	66.8537
Deaths	China	Both	1 to 4	Cardiovascular diseases	Rate	1993	8.4088
Deaths	China	Both	10 to 14	Cardiovascular diseases	Rate	1993	3.96499
Deaths	China	Both	15 to 19	Cardiovascular diseases	Rate	1993	8.86912
Deaths	China	Both	20 to 24	Cardiovascular diseases	Rate	1993	15.6282
Deaths	China	Both	25 to 29	Cardiovascular diseases	Rate	1993	19.6021
Deaths	China	Both	30 to 34	Cardiovascular diseases	Rate	1993	27.6202
Deaths	China	Both	35 to 39	Cardiovascular diseases	Rate	1993	46.1764
Deaths	China	Both	40 to 44	Cardiovascular diseases	Rate	1993	83.2448
Deaths	China	Both	45 to 49	Cardiovascular diseases	Rate	1993	139.849
Deaths	China	Both	5 to 9	Cardiovascular diseases	Rate	1993	3.85238
Deaths	China	Both	50 to 54	Cardiovascular diseases	Rate	1993	248.757
Deaths	China	Both	55 to 59	Cardiovascular diseases	Rate	1993	407.592
Deaths	China	Both	60 to 64	Cardiovascular diseases	Rate	1993	762.314
Deaths	China	Both	65 to 69	Cardiovascular diseases	Rate	1993	1258.26
Deaths	China	Both	70 to 74	Cardiovascular diseases	Rate	1993	2277.7
Deaths	China	Both	75 to 79	Cardiovascular diseases	Rate	1993	3449.68
Deaths	China	Both	80 to 84	Cardiovascular diseases	Rate	1993	5602.97
Deaths	China	Both	85 to 89	Cardiovascular diseases	Rate	1993	8411.66
Deaths	China	Both	90 to 94	Cardiovascular diseases	Rate	1993	12274.8
Deaths	China	Both	95 plus	Cardiovascular diseases	Rate	1993	18997.1
Deaths	China	Both	<1 year	Chronic respiratory diseases	Rate	1993	0
Deaths	China	Both	1 to 4	Chronic respiratory diseases	Rate	1993	2.50209
Deaths	China	Both	10 to 14	Chronic respiratory diseases	Rate	1993	0.878644
Deaths	China	Both	15 to 19	Chronic respiratory diseases	Rate	1993	2.10762
Deaths	China	Both	20 to 24	Chronic respiratory diseases	Rate	1993	3.23426
Deaths	China	Both	25 to 29	Chronic respiratory diseases	Rate	1993	4.51585
Deaths	China	Both	30 to 34	Chronic respiratory diseases	Rate	1993	6.5763
Deaths	China	Both	35 to 39	Chronic respiratory diseases	Rate	1993	10.2398
Deaths	China	Both	40 to 44	Chronic respiratory diseases	Rate	1993	18.8681
Deaths	China	Both	45 to 49	Chronic respiratory diseases	Rate	1993	34.0625
Deaths	China	Both	5 to 9	Chronic respiratory diseases	Rate	1993	0.94355
Deaths	China	Both	50 to 54	Chronic respiratory diseases	Rate	1993	70.7915
Deaths	China	Both	55 to 59	Chronic respiratory diseases	Rate	1993	137.032
Deaths	China	Both	60 to 64	Chronic respiratory diseases	Rate	1993	329.024
Deaths	China	Both	65 to 69	Chronic respiratory diseases	Rate	1993	623.004
Deaths	China	Both	70 to 74	Chronic respiratory diseases	Rate	1993	1410.41
Deaths	China	Both	75 to 79	Chronic respiratory diseases	Rate	1993	2269.75
Deaths	China	Both	80 to 84	Chronic respiratory diseases	Rate	1993	3842.1
Deaths	China	Both	85 to 89	Chronic respiratory diseases	Rate	1993	5810.55
Deaths	China	Both	90 to 94	Chronic respiratory diseases	Rate	1993	8184.88
Deaths	China	Both	95 plus	Chronic respiratory diseases	Rate	1993	12027.3
Deaths	China	Both	1 to 4	Cirrhosis and other chronic liver diseases	Rate	1993	1.03456
Deaths	China	Both	10 to 14	Cirrhosis and other chronic liver diseases	Rate	1993	0.444245
Deaths	China	Both	15 to 19	Cirrhosis and other chronic liver diseases	Rate	1993	0.792092
Deaths	China	Both	20 to 24	Cirrhosis and other chronic liver diseases	Rate	1993	1.78284
Deaths	China	Both	25 to 29	Cirrhosis and other chronic liver diseases	Rate	1993	3.57634
Deaths	China	Both	30 to 34	Cirrhosis and other chronic liver diseases	Rate	1993	6.73182
Deaths	China	Both	35 to 39	Cirrhosis and other chronic liver diseases	Rate	1993	12.2223
Deaths	China	Both	40 to 44	Cirrhosis and other chronic liver diseases	Rate	1993	20.028
Deaths	China	Both	45 to 49	Cirrhosis and other chronic liver diseases	Rate	1993	28.4137
Deaths	China	Both	5 to 9	Cirrhosis and other chronic liver diseases	Rate	1993	0.442151
Deaths	China	Both	50 to 54	Cirrhosis and other chronic liver diseases	Rate	1993	38.1731
Deaths	China	Both	55 to 59	Cirrhosis and other chronic liver diseases	Rate	1993	45.7082
Deaths	China	Both	60 to 64	Cirrhosis and other chronic liver diseases	Rate	1993	59.089
Deaths	China	Both	65 to 69	Cirrhosis and other chronic liver diseases	Rate	1993	71.0755
Deaths	China	Both	70 to 74	Cirrhosis and other chronic liver diseases	Rate	1993	89.0289
Deaths	China	Both	75 to 79	Cirrhosis and other chronic liver diseases	Rate	1993	102.872
Deaths	China	Both	80 to 84	Cirrhosis and other chronic liver diseases	Rate	1993	120.468
Deaths	China	Both	85 to 89	Cirrhosis and other chronic liver diseases	Rate	1993	133.713
Deaths	China	Both	90 to 94	Cirrhosis and other chronic liver diseases	Rate	1993	136.013
Deaths	China	Both	95 plus	Cirrhosis and other chronic liver diseases	Rate	1993	172.252
Deaths	China	Both	<1 year	Communicable, maternal, neonatal, and nutritional diseases	Rate	1993	3010.65
Deaths	China	Both	1 to 4	Communicable, maternal, neonatal, and nutritional diseases	Rate	1993	107.631
Deaths	China	Both	10 to 14	Communicable, maternal, neonatal, and nutritional diseases	Rate	1993	8.8672
Deaths	China	Both	15 to 19	Communicable, maternal, neonatal, and nutritional diseases	Rate	1993	9.09508
Deaths	China	Both	20 to 24	Communicable, maternal, neonatal, and nutritional diseases	Rate	1993	14.8795
Deaths	China	Both	25 to 29	Communicable, maternal, neonatal, and nutritional diseases	Rate	1993	16.3703
Deaths	China	Both	30 to 34	Communicable, maternal, neonatal, and nutritional diseases	Rate	1993	18.0849
Deaths	China	Both	35 to 39	Communicable, maternal, neonatal, and nutritional diseases	Rate	1993	20.4095
Deaths	China	Both	40 to 44	Communicable, maternal, neonatal, and nutritional diseases	Rate	1993	24.4747
Deaths	China	Both	45 to 49	Communicable, maternal, neonatal, and nutritional diseases	Rate	1993	29.9146
Deaths	China	Both	5 to 9	Communicable, maternal, neonatal, and nutritional diseases	Rate	1993	16.7277
Deaths	China	Both	50 to 54	Communicable, maternal, neonatal, and nutritional diseases	Rate	1993	39.9431
Deaths	China	Both	55 to 59	Communicable, maternal, neonatal, and nutritional diseases	Rate	1993	55.2848
Deaths	China	Both	60 to 64	Communicable, maternal, neonatal, and nutritional diseases	Rate	1993	89.7868
Deaths	China	Both	65 to 69	Communicable, maternal, neonatal, and nutritional diseases	Rate	1993	133.988
Deaths	China	Both	70 to 74	Communicable, maternal, neonatal, and nutritional diseases	Rate	1993	228.642
Deaths	China	Both	75 to 79	Communicable, maternal, neonatal, and nutritional diseases	Rate	1993	349.061
Deaths	China	Both	80 to 84	Communicable, maternal, neonatal, and nutritional diseases	Rate	1993	608.37
Deaths	China	Both	85 to 89	Communicable, maternal, neonatal, and nutritional diseases	Rate	1993	992.46
Deaths	China	Both	90 to 94	Communicable, maternal, neonatal, and nutritional diseases	Rate	1993	1600.13
Deaths	China	Both	95 plus	Communicable, maternal, neonatal, and nutritional diseases	Rate	1993	2982.49
Deaths	China	Both	<1 year	Diabetes, urogenital, blood, and endocrine diseases	Rate	1993	33.9277
Deaths	China	Both	1 to 4	Diabetes, urogenital, blood, and endocrine diseases	Rate	1993	6.20302
Deaths	China	Both	10 to 14	Diabetes, urogenital, blood, and endocrine diseases	Rate	1993	2.42889
Deaths	China	Both	15 to 19	Diabetes, urogenital, blood, and endocrine diseases	Rate	1993	3.11291
Deaths	China	Both	20 to 24	Diabetes, urogenital, blood, and endocrine diseases	Rate	1993	5.13374
Deaths	China	Both	25 to 29	Diabetes, urogenital, blood, and endocrine diseases	Rate	1993	6.01219
Deaths	China	Both	30 to 34	Diabetes, urogenital, blood, and endocrine diseases	Rate	1993	7.28425
Deaths	China	Both	35 to 39	Diabetes, urogenital, blood, and endocrine diseases	Rate	1993	9.56756
Deaths	China	Both	40 to 44	Diabetes, urogenital, blood, and endocrine diseases	Rate	1993	13.0604
Deaths	China	Both	45 to 49	Diabetes, urogenital, blood, and endocrine diseases	Rate	1993	17.8289
Deaths	China	Both	5 to 9	Diabetes, urogenital, blood, and endocrine diseases	Rate	1993	2.50283
Deaths	China	Both	50 to 54	Diabetes, urogenital, blood, and endocrine diseases	Rate	1993	25.8716
Deaths	China	Both	55 to 59	Diabetes, urogenital, blood, and endocrine diseases	Rate	1993	39.4841
Deaths	China	Both	60 to 64	Diabetes, urogenital, blood, and endocrine diseases	Rate	1993	67.6978
Deaths	China	Both	65 to 69	Diabetes, urogenital, blood, and endocrine diseases	Rate	1993	102.783
Deaths	China	Both	70 to 74	Diabetes, urogenital, blood, and endocrine diseases	Rate	1993	161.637
Deaths	China	Both	75 to 79	Diabetes, urogenital, blood, and endocrine diseases	Rate	1993	227.197
Deaths	China	Both	80 to 84	Diabetes, urogenital, blood, and endocrine diseases	Rate	1993	309.325
Deaths	China	Both	85 to 89	Diabetes, urogenital, blood, and endocrine diseases	Rate	1993	436.335
Deaths	China	Both	90 to 94	Diabetes, urogenital, blood, and endocrine diseases	Rate	1993	606.011
Deaths	China	Both	95 plus	Diabetes, urogenital, blood, and endocrine diseases	Rate	1993	945.755
Deaths	China	Both	<1 year	Diarrhea, lower respiratory, and other common infectious diseases	Rate	1993	1305.77
Deaths	China	Both	1 to 4	Diarrhea, lower respiratory, and other common infectious diseases	Rate	1993	97.5221
Deaths	China	Both	10 to 14	Diarrhea, lower respiratory, and other common infectious diseases	Rate	1993	6.17184
Deaths	China	Both	15 to 19	Diarrhea, lower respiratory, and other common infectious diseases	Rate	1993	4.47697
Deaths	China	Both	20 to 24	Diarrhea, lower respiratory, and other common infectious diseases	Rate	1993	4.22839
Deaths	China	Both	25 to 29	Diarrhea, lower respiratory, and other common infectious diseases	Rate	1993	4.13663
Deaths	China	Both	30 to 34	Diarrhea, lower respiratory, and other common infectious diseases	Rate	1993	4.30245
Deaths	China	Both	35 to 39	Diarrhea, lower respiratory, and other common infectious diseases	Rate	1993	4.57444
Deaths	China	Both	40 to 44	Diarrhea, lower respiratory, and other common infectious diseases	Rate	1993	5.88946
Deaths	China	Both	45 to 49	Diarrhea, lower respiratory, and other common infectious diseases	Rate	1993	7.78101
Deaths	China	Both	5 to 9	Diarrhea, lower respiratory, and other common infectious diseases	Rate	1993	13.521
Deaths	China	Both	50 to 54	Diarrhea, lower respiratory, and other common infectious diseases	Rate	1993	11.0667
Deaths	China	Both	55 to 59	Diarrhea, lower respiratory, and other common infectious diseases	Rate	1993	16.1139
Deaths	China	Both	60 to 64	Diarrhea, lower respiratory, and other common infectious diseases	Rate	1993	29.0694
Deaths	China	Both	65 to 69	Diarrhea, lower respiratory, and other common infectious diseases	Rate	1993	49.2554
Deaths	China	Both	70 to 74	Diarrhea, lower respiratory, and other common infectious diseases	Rate	1993	104.447
Deaths	China	Both	75 to 79	Diarrhea, lower respiratory, and other common infectious diseases	Rate	1993	186.046
Deaths	China	Both	80 to 84	Diarrhea, lower respiratory, and other common infectious diseases	Rate	1993	391.319
Deaths	China	Both	85 to 89	Diarrhea, lower respiratory, and other common infectious diseases	Rate	1993	693.392
Deaths	China	Both	90 to 94	Diarrhea, lower respiratory, and other common infectious diseases	Rate	1993	1188.47
Deaths	China	Both	95 plus	Diarrhea, lower respiratory, and other common infectious diseases	Rate	1993	2174.08
Deaths	China	Both	<1 year	Digestive diseases	Rate	1993	21.1676
Deaths	China	Both	1 to 4	Digestive diseases	Rate	1993	5.23481
Deaths	China	Both	10 to 14	Digestive diseases	Rate	1993	0.919934
Deaths	China	Both	15 to 19	Digestive diseases	Rate	1993	1.10733
Deaths	China	Both	20 to 24	Digestive diseases	Rate	1993	1.84294
Deaths	China	Both	25 to 29	Digestive diseases	Rate	1993	2.5058
Deaths	China	Both	30 to 34	Digestive diseases	Rate	1993	3.39079
Deaths	China	Both	35 to 39	Digestive diseases	Rate	1993	4.46179
Deaths	China	Both	40 to 44	Digestive diseases	Rate	1993	6.64682
Deaths	China	Both	45 to 49	Digestive diseases	Rate	1993	9.78704
Deaths	China	Both	5 to 9	Digestive diseases	Rate	1993	1.35838
Deaths	China	Both	50 to 54	Digestive diseases	Rate	1993	14.5432
Deaths	China	Both	55 to 59	Digestive diseases	Rate	1993	22.1218
Deaths	China	Both	60 to 64	Digestive diseases	Rate	1993	36.5971
Deaths	China	Both	65 to 69	Digestive diseases	Rate	1993	55.1043
Deaths	China	Both	70 to 74	Digestive diseases	Rate	1993	94.3617
Deaths	China	Both	75 to 79	Digestive diseases	Rate	1993	145.451
Deaths	China	Both	80 to 84	Digestive diseases	Rate	1993	228.741
Deaths	China	Both	85 to 89	Digestive diseases	Rate	1993	345.678
Deaths	China	Both	90 to 94	Digestive diseases	Rate	1993	491.205
Deaths	China	Both	95 plus	Digestive diseases	Rate	1993	699.861
Deaths	China	Both	<1 year	Forces of nature, conflict and terrorism, and executions and police conflict	Rate	1993	0.257583
Deaths	China	Both	1 to 4	Forces of nature, conflict and terrorism, and executions and police conflict	Rate	1993	0.164189
Deaths	China	Both	10 to 14	Forces of nature, conflict and terrorism, and executions and police conflict	Rate	1993	0.148356
Deaths	China	Both	15 to 19	Forces of nature, conflict and terrorism, and executions and police conflict	Rate	1993	0.492363
Deaths	China	Both	20 to 24	Forces of nature, conflict and terrorism, and executions and police conflict	Rate	1993	1.92979
Deaths	China	Both	25 to 29	Forces of nature, conflict and terrorism, and executions and police conflict	Rate	1993	2.18102
Deaths	China	Both	30 to 34	Forces of nature, conflict and terrorism, and executions and police conflict	Rate	1993	1.82109
Deaths	China	Both	35 to 39	Forces of nature, conflict and terrorism, and executions and police conflict	Rate	1993	1.54006
Deaths	China	Both	40 to 44	Forces of nature, conflict and terrorism, and executions and police conflict	Rate	1993	0.869792
Deaths	China	Both	45 to 49	Forces of nature, conflict and terrorism, and executions and police conflict	Rate	1993	0.839982
Deaths	China	Both	5 to 9	Forces of nature, conflict and terrorism, and executions and police conflict	Rate	1993	0.137875
Deaths	China	Both	50 to 54	Forces of nature, conflict and terrorism, and executions and police conflict	Rate	1993	0.668672
Deaths	China	Both	55 to 59	Forces of nature, conflict and terrorism, and executions and police conflict	Rate	1993	0.424484
Deaths	China	Both	60 to 64	Forces of nature, conflict and terrorism, and executions and police conflict	Rate	1993	0.414517
Deaths	China	Both	65 to 69	Forces of nature, conflict and terrorism, and executions and police conflict	Rate	1993	0.408302
Deaths	China	Both	70 to 74	Forces of nature, conflict and terrorism, and executions and police conflict	Rate	1993	0.407472
Deaths	China	Both	75 to 79	Forces of nature, conflict and terrorism, and executions and police conflict	Rate	1993	0.368242
Deaths	China	Both	80 to 84	Forces of nature, conflict and terrorism, and executions and police conflict	Rate	1993	0.569619
Deaths	China	Both	85 to 89	Forces of nature, conflict and terrorism, and executions and police conflict	Rate	1993	0.493571
Deaths	China	Both	90 to 94	Forces of nature, conflict and terrorism, and executions and police conflict	Rate	1993	0.818331
Deaths	China	Both	95 plus	Forces of nature, conflict and terrorism, and executions and police conflict	Rate	1993	2.51848
Deaths	China	Both	<1 year	HIV/AIDS and tuberculosis	Rate	1993	6.05159
Deaths	China	Both	1 to 4	HIV/AIDS and tuberculosis	Rate	1993	2.20344
Deaths	China	Both	10 to 14	HIV/AIDS and tuberculosis	Rate	1993	1.14602
Deaths	China	Both	15 to 19	HIV/AIDS and tuberculosis	Rate	1993	2.10132
Deaths	China	Both	20 to 24	HIV/AIDS and tuberculosis	Rate	1993	4.20285
Deaths	China	Both	25 to 29	HIV/AIDS and tuberculosis	Rate	1993	5.08823
Deaths	China	Both	30 to 34	HIV/AIDS and tuberculosis	Rate	1993	6.61426
Deaths	China	Both	35 to 39	HIV/AIDS and tuberculosis	Rate	1993	8.45357
Deaths	China	Both	40 to 44	HIV/AIDS and tuberculosis	Rate	1993	11.7463
Deaths	China	Both	45 to 49	HIV/AIDS and tuberculosis	Rate	1993	15.068
Deaths	China	Both	5 to 9	HIV/AIDS and tuberculosis	Rate	1993	0.925756
Deaths	China	Both	50 to 54	HIV/AIDS and tuberculosis	Rate	1993	20.8424
Deaths	China	Both	55 to 59	HIV/AIDS and tuberculosis	Rate	1993	30.0294
Deaths	China	Both	60 to 64	HIV/AIDS and tuberculosis	Rate	1993	48.6457
Deaths	China	Both	65 to 69	HIV/AIDS and tuberculosis	Rate	1993	68.0225
Deaths	China	Both	70 to 74	HIV/AIDS and tuberculosis	Rate	1993	99.5321
Deaths	China	Both	75 to 79	HIV/AIDS and tuberculosis	Rate	1993	127.233
Deaths	China	Both	80 to 84	HIV/AIDS and tuberculosis	Rate	1993	152.104
Deaths	China	Both	85 to 89	HIV/AIDS and tuberculosis	Rate	1993	175.998
Deaths	China	Both	90 to 94	HIV/AIDS and tuberculosis	Rate	1993	161.489
Deaths	China	Both	95 plus	HIV/AIDS and tuberculosis	Rate	1993	193.107
Deaths	China	Both	<1 year	Injuries	Rate	1993	182.81
Deaths	China	Both	1 to 4	Injuries	Rate	1993	101.306
Deaths	China	Both	10 to 14	Injuries	Rate	1993	41.3349
Deaths	China	Both	15 to 19	Injuries	Rate	1993	55.1678
Deaths	China	Both	20 to 24	Injuries	Rate	1993	84.5149
Deaths	China	Both	25 to 29	Injuries	Rate	1993	83.9911
Deaths	China	Both	30 to 34	Injuries	Rate	1993	79.3155
Deaths	China	Both	35 to 39	Injuries	Rate	1993	82.709
Deaths	China	Both	40 to 44	Injuries	Rate	1993	82.9546
Deaths	China	Both	45 to 49	Injuries	Rate	1993	83.6683
Deaths	China	Both	5 to 9	Injuries	Rate	1993	53.0137
Deaths	China	Both	50 to 54	Injuries	Rate	1993	85.7513
Deaths	China	Both	55 to 59	Injuries	Rate	1993	91.9987
Deaths	China	Both	60 to 64	Injuries	Rate	1993	106.18
Deaths	China	Both	65 to 69	Injuries	Rate	1993	124.983
Deaths	China	Both	70 to 74	Injuries	Rate	1993	171.61
Deaths	China	Both	75 to 79	Injuries	Rate	1993	222.424
Deaths	China	Both	80 to 84	Injuries	Rate	1993	324.721
Deaths	China	Both	85 to 89	Injuries	Rate	1993	469.083
Deaths	China	Both	90 to 94	Injuries	Rate	1993	648.358
Deaths	China	Both	95 plus	Injuries	Rate	1993	983.728
Deaths	China	Both	10 to 14	Maternal disorders	Rate	1993	0.14441
Deaths	China	Both	15 to 19	Maternal disorders	Rate	1993	1.25702
Deaths	China	Both	20 to 24	Maternal disorders	Rate	1993	4.64393
Deaths	China	Both	25 to 29	Maternal disorders	Rate	1993	4.94141
Deaths	China	Both	30 to 34	Maternal disorders	Rate	1993	4.184
Deaths	China	Both	35 to 39	Maternal disorders	Rate	1993	3.27178
Deaths	China	Both	40 to 44	Maternal disorders	Rate	1993	1.48431
Deaths	China	Both	45 to 49	Maternal disorders	Rate	1993	0.551156
Deaths	China	Both	50 to 54	Maternal disorders	Rate	1993	0.167395
Deaths	China	Both	<1 year	Mental disorders	Rate	1993	0.026369
Deaths	China	Both	1 to 4	Mental disorders	Rate	1993	0
Deaths	China	Both	10 to 14	Mental disorders	Rate	1993	0.00443244
Deaths	China	Both	15 to 19	Mental disorders	Rate	1993	2.79558
Deaths	China	Both	20 to 24	Mental disorders	Rate	1993	4.91183
Deaths	China	Both	25 to 29	Mental disorders	Rate	1993	5.78766
Deaths	China	Both	30 to 34	Mental disorders	Rate	1993	5.9291
Deaths	China	Both	35 to 39	Mental disorders	Rate	1993	5.89832
Deaths	China	Both	40 to 44	Mental disorders	Rate	1993	6.10851
Deaths	China	Both	45 to 49	Mental disorders	Rate	1993	6.14855
Deaths	China	Both	5 to 9	Mental disorders	Rate	1993	0.00414118
Deaths	China	Both	50 to 54	Mental disorders	Rate	1993	6.50585
Deaths	China	Both	55 to 59	Mental disorders	Rate	1993	6.85019
Deaths	China	Both	60 to 64	Mental disorders	Rate	1993	8.26041
Deaths	China	Both	65 to 69	Mental disorders	Rate	1993	9.19427
Deaths	China	Both	70 to 74	Mental disorders	Rate	1993	11.813
Deaths	China	Both	75 to 79	Mental disorders	Rate	1993	15.0369
Deaths	China	Both	80 to 84	Mental disorders	Rate	1993	17.2228
Deaths	China	Both	85 to 89	Mental disorders	Rate	1993	25.856
Deaths	China	Both	90 to 94	Mental disorders	Rate	1993	37.7107
Deaths	China	Both	95 plus	Mental disorders	Rate	1993	54.4296
Deaths	China	Both	10 to 14	Musculoskeletal disorders	Rate	1993	0.381662
Deaths	China	Both	15 to 19	Musculoskeletal disorders	Rate	1993	0.719219
Deaths	China	Both	20 to 24	Musculoskeletal disorders	Rate	1993	0.980553
Deaths	China	Both	25 to 29	Musculoskeletal disorders	Rate	1993	0.941248
Deaths	China	Both	30 to 34	Musculoskeletal disorders	Rate	1993	0.800353
Deaths	China	Both	35 to 39	Musculoskeletal disorders	Rate	1993	0.914456
Deaths	China	Both	40 to 44	Musculoskeletal disorders	Rate	1993	1.05873
Deaths	China	Both	45 to 49	Musculoskeletal disorders	Rate	1993	1.19321
Deaths	China	Both	5 to 9	Musculoskeletal disorders	Rate	1993	0.218857
Deaths	China	Both	50 to 54	Musculoskeletal disorders	Rate	1993	1.54461
Deaths	China	Both	55 to 59	Musculoskeletal disorders	Rate	1993	1.93369
Deaths	China	Both	60 to 64	Musculoskeletal disorders	Rate	1993	3.21045
Deaths	China	Both	65 to 69	Musculoskeletal disorders	Rate	1993	4.85793
Deaths	China	Both	70 to 74	Musculoskeletal disorders	Rate	1993	7.50184
Deaths	China	Both	75 to 79	Musculoskeletal disorders	Rate	1993	10.5459
Deaths	China	Both	80 to 84	Musculoskeletal disorders	Rate	1993	15.1388
Deaths	China	Both	85 to 89	Musculoskeletal disorders	Rate	1993	24.1093
Deaths	China	Both	90 to 94	Musculoskeletal disorders	Rate	1993	32.0844
Deaths	China	Both	95 plus	Musculoskeletal disorders	Rate	1993	49.1306
Deaths	China	Both	<1 year	Neglected tropical diseases and malaria	Rate	1993	3.30096
Deaths	China	Both	1 to 4	Neglected tropical diseases and malaria	Rate	1993	1.90695
Deaths	China	Both	10 to 14	Neglected tropical diseases and malaria	Rate	1993	0.637864
Deaths	China	Both	15 to 19	Neglected tropical diseases and malaria	Rate	1993	0.336116
Deaths	China	Both	20 to 24	Neglected tropical diseases and malaria	Rate	1993	0.36399
Deaths	China	Both	25 to 29	Neglected tropical diseases and malaria	Rate	1993	0.3468
Deaths	China	Both	30 to 34	Neglected tropical diseases and malaria	Rate	1993	0.474655
Deaths	China	Both	35 to 39	Neglected tropical diseases and malaria	Rate	1993	0.635328
Deaths	China	Both	40 to 44	Neglected tropical diseases and malaria	Rate	1993	0.847338
Deaths	China	Both	45 to 49	Neglected tropical diseases and malaria	Rate	1993	1.06612
Deaths	China	Both	5 to 9	Neglected tropical diseases and malaria	Rate	1993	1.02899
Deaths	China	Both	50 to 54	Neglected tropical diseases and malaria	Rate	1993	1.43727
Deaths	China	Both	55 to 59	Neglected tropical diseases and malaria	Rate	1993	1.85857
Deaths	China	Both	60 to 64	Neglected tropical diseases and malaria	Rate	1993	2.27789
Deaths	China	Both	65 to 69	Neglected tropical diseases and malaria	Rate	1993	2.67996
Deaths	China	Both	70 to 74	Neglected tropical diseases and malaria	Rate	1993	3.37618
Deaths	China	Both	75 to 79	Neglected tropical diseases and malaria	Rate	1993	3.39822
Deaths	China	Both	80 to 84	Neglected tropical diseases and malaria	Rate	1993	3.28308
Deaths	China	Both	85 to 89	Neglected tropical diseases and malaria	Rate	1993	3.3955
Deaths	China	Both	90 to 94	Neglected tropical diseases and malaria	Rate	1993	3.56175
Deaths	China	Both	95 plus	Neglected tropical diseases and malaria	Rate	1993	5.4071
Deaths	China	Both	<1 year	Neonatal disorders	Rate	1993	1608.64
Deaths	China	Both	1 to 4	Neonatal disorders	Rate	1993	1.76268
Deaths	China	Both	<1 year	Neoplasms	Rate	1993	24.9415
Deaths	China	Both	1 to 4	Neoplasms	Rate	1993	13.2192
Deaths	China	Both	10 to 14	Neoplasms	Rate	1993	9.16936
Deaths	China	Both	15 to 19	Neoplasms	Rate	1993	11.7567
Deaths	China	Both	20 to 24	Neoplasms	Rate	1993	15.1846
Deaths	China	Both	25 to 29	Neoplasms	Rate	1993	21.4416
Deaths	China	Both	30 to 34	Neoplasms	Rate	1993	36.7258
Deaths	China	Both	35 to 39	Neoplasms	Rate	1993	62.7755
Deaths	China	Both	40 to 44	Neoplasms	Rate	1993	109.574
Deaths	China	Both	45 to 49	Neoplasms	Rate	1993	178.462
Deaths	China	Both	5 to 9	Neoplasms	Rate	1993	9.3086
Deaths	China	Both	50 to 54	Neoplasms	Rate	1993	275.029
Deaths	China	Both	55 to 59	Neoplasms	Rate	1993	415.905
Deaths	China	Both	60 to 64	Neoplasms	Rate	1993	642.605
Deaths	China	Both	65 to 69	Neoplasms	Rate	1993	862.174
Deaths	China	Both	70 to 74	Neoplasms	Rate	1993	1140.54
Deaths	China	Both	75 to 79	Neoplasms	Rate	1993	1282.74
Deaths	China	Both	80 to 84	Neoplasms	Rate	1993	1324.43
Deaths	China	Both	85 to 89	Neoplasms	Rate	1993	1463.42
Deaths	China	Both	90 to 94	Neoplasms	Rate	1993	1598.74
Deaths	China	Both	95 plus	Neoplasms	Rate	1993	1936.33
Deaths	China	Both	<1 year	Neurological disorders	Rate	1993	8.65336
Deaths	China	Both	1 to 4	Neurological disorders	Rate	1993	2.15997
Deaths	China	Both	10 to 14	Neurological disorders	Rate	1993	1.67115
Deaths	China	Both	15 to 19	Neurological disorders	Rate	1993	2.41779
Deaths	China	Both	20 to 24	Neurological disorders	Rate	1993	2.99248
Deaths	China	Both	25 to 29	Neurological disorders	Rate	1993	2.69925
Deaths	China	Both	30 to 34	Neurological disorders	Rate	1993	2.66598
Deaths	China	Both	35 to 39	Neurological disorders	Rate	1993	2.64844
Deaths	China	Both	40 to 44	Neurological disorders	Rate	1993	2.7092
Deaths	China	Both	45 to 49	Neurological disorders	Rate	1993	3.55018
Deaths	China	Both	5 to 9	Neurological disorders	Rate	1993	1.30382
Deaths	China	Both	50 to 54	Neurological disorders	Rate	1993	6.16
Deaths	China	Both	55 to 59	Neurological disorders	Rate	1993	10.7862
Deaths	China	Both	60 to 64	Neurological disorders	Rate	1993	22.2845
Deaths	China	Both	65 to 69	Neurological disorders	Rate	1993	47.8555
Deaths	China	Both	70 to 74	Neurological disorders	Rate	1993	118.23
Deaths	China	Both	75 to 79	Neurological disorders	Rate	1993	311.702
Deaths	China	Both	80 to 84	Neurological disorders	Rate	1993	775.854
Deaths	China	Both	85 to 89	Neurological disorders	Rate	1993	1728.42
Deaths	China	Both	90 to 94	Neurological disorders	Rate	1993	3438.21
Deaths	China	Both	95 plus	Neurological disorders	Rate	1993	4879.52
Deaths	China	Both	<1 year	Non-communicable diseases	Rate	1993	679.528
Deaths	China	Both	1 to 4	Non-communicable diseases	Rate	1993	62.9314
Deaths	China	Both	10 to 14	Non-communicable diseases	Rate	1993	23.0686
Deaths	China	Both	15 to 19	Non-communicable diseases	Rate	1993	36.1539
Deaths	China	Both	20 to 24	Non-communicable diseases	Rate	1993	53.9279
Deaths	China	Both	25 to 29	Non-communicable diseases	Rate	1993	68.7479
Deaths	China	Both	30 to 34	Non-communicable diseases	Rate	1993	98.8233
Deaths	China	Both	35 to 39	Non-communicable diseases	Rate	1993	155.841
Deaths	China	Both	40 to 44	Non-communicable diseases	Rate	1993	262.111
Deaths	China	Both	45 to 49	Non-communicable diseases	Rate	1993	420.008
Deaths	China	Both	5 to 9	Non-communicable diseases	Rate	1993	24.4839
Deaths	China	Both	50 to 54	Non-communicable diseases	Rate	1993	688.051
Deaths	China	Both	55 to 59	Non-communicable diseases	Rate	1993	1088.17
Deaths	China	Both	60 to 64	Non-communicable diseases	Rate	1993	1931.96
Deaths	China	Both	65 to 69	Non-communicable diseases	Rate	1993	3035.54
Deaths	China	Both	70 to 74	Non-communicable diseases	Rate	1993	5312.78
Deaths	China	Both	75 to 79	Non-communicable diseases	Rate	1993	7818.16
Deaths	China	Both	80 to 84	Non-communicable diseases	Rate	1993	12244
Deaths	China	Both	85 to 89	Non-communicable diseases	Rate	1993	18396.1
Deaths	China	Both	90 to 94	Non-communicable diseases	Rate	1993	26837.1
Deaths	China	Both	95 plus	Non-communicable diseases	Rate	1993	39831.1
Deaths	China	Both	<1 year	Nutritional deficiencies	Rate	1993	63.3787
Deaths	China	Both	1 to 4	Nutritional deficiencies	Rate	1993	2.14367
Deaths	China	Both	10 to 14	Nutritional deficiencies	Rate	1993	0.322532
Deaths	China	Both	15 to 19	Nutritional deficiencies	Rate	1993	0.31716
Deaths	China	Both	20 to 24	Nutritional deficiencies	Rate	1993	0.365846
Deaths	China	Both	25 to 29	Nutritional deficiencies	Rate	1993	0.353282
Deaths	China	Both	30 to 34	Nutritional deficiencies	Rate	1993	0.365088
Deaths	China	Both	35 to 39	Nutritional deficiencies	Rate	1993	0.456687
Deaths	China	Both	40 to 44	Nutritional deficiencies	Rate	1993	0.553999
Deaths	China	Both	45 to 49	Nutritional deficiencies	Rate	1993	0.688884
Deaths	China	Both	5 to 9	Nutritional deficiencies	Rate	1993	0.553455
Deaths	China	Both	50 to 54	Nutritional deficiencies	Rate	1993	0.884523
Deaths	China	Both	55 to 59	Nutritional deficiencies	Rate	1993	1.24564
Deaths	China	Both	60 to 64	Nutritional deficiencies	Rate	1993	2.15644
Deaths	China	Both	65 to 69	Nutritional deficiencies	Rate	1993	3.44301
Deaths	China	Both	70 to 74	Nutritional deficiencies	Rate	1993	8.33861
Deaths	China	Both	75 to 79	Nutritional deficiencies	Rate	1993	17.9548
Deaths	China	Both	80 to 84	Nutritional deficiencies	Rate	1993	45.4368
Deaths	China	Both	85 to 89	Nutritional deficiencies	Rate	1993	99.1248
Deaths	China	Both	90 to 94	Nutritional deficiencies	Rate	1993	224.582
Deaths	China	Both	95 plus	Nutritional deficiencies	Rate	1993	574.188
Deaths	China	Both	<1 year	Other communicable, maternal, neonatal, and nutritional diseases	Rate	1993	23.5047
Deaths	China	Both	1 to 4	Other communicable, maternal, neonatal, and nutritional diseases	Rate	1993	2.09202
Deaths	China	Both	10 to 14	Other communicable, maternal, neonatal, and nutritional diseases	Rate	1993	0.444532
Deaths	China	Both	15 to 19	Other communicable, maternal, neonatal, and nutritional diseases	Rate	1993	0.606493
Deaths	China	Both	20 to 24	Other communicable, maternal, neonatal, and nutritional diseases	Rate	1993	1.07445
Deaths	China	Both	25 to 29	Other communicable, maternal, neonatal, and nutritional diseases	Rate	1993	1.5039
Deaths	China	Both	30 to 34	Other communicable, maternal, neonatal, and nutritional diseases	Rate	1993	2.14445
Deaths	China	Both	35 to 39	Other communicable, maternal, neonatal, and nutritional diseases	Rate	1993	3.01773
Deaths	China	Both	40 to 44	Other communicable, maternal, neonatal, and nutritional diseases	Rate	1993	3.95336
Deaths	China	Both	45 to 49	Other communicable, maternal, neonatal, and nutritional diseases	Rate	1993	4.75935
Deaths	China	Both	5 to 9	Other communicable, maternal, neonatal, and nutritional diseases	Rate	1993	0.698522
Deaths	China	Both	50 to 54	Other communicable, maternal, neonatal, and nutritional diseases	Rate	1993	5.54478
Deaths	China	Both	55 to 59	Other communicable, maternal, neonatal, and nutritional diseases	Rate	1993	6.03728
Deaths	China	Both	60 to 64	Other communicable, maternal, neonatal, and nutritional diseases	Rate	1993	7.63743
Deaths	China	Both	65 to 69	Other communicable, maternal, neonatal, and nutritional diseases	Rate	1993	10.5873
Deaths	China	Both	70 to 74	Other communicable, maternal, neonatal, and nutritional diseases	Rate	1993	12.9483
Deaths	China	Both	75 to 79	Other communicable, maternal, neonatal, and nutritional diseases	Rate	1993	14.4298
Deaths	China	Both	80 to 84	Other communicable, maternal, neonatal, and nutritional diseases	Rate	1993	16.228
Deaths	China	Both	85 to 89	Other communicable, maternal, neonatal, and nutritional diseases	Rate	1993	20.5501
Deaths	China	Both	90 to 94	Other communicable, maternal, neonatal, and nutritional diseases	Rate	1993	22.0292
Deaths	China	Both	95 plus	Other communicable, maternal, neonatal, and nutritional diseases	Rate	1993	35.7102
Deaths	China	Both	<1 year	Other non-communicable diseases	Rate	1993	523.957
Deaths	China	Both	1 to 4	Other non-communicable diseases	Rate	1993	24.1689
Deaths	China	Both	10 to 14	Other non-communicable diseases	Rate	1993	3.20527
Deaths	China	Both	15 to 19	Other non-communicable diseases	Rate	1993	2.47553
Deaths	China	Both	20 to 24	Other non-communicable diseases	Rate	1993	2.23649
Deaths	China	Both	25 to 29	Other non-communicable diseases	Rate	1993	1.66593
Deaths	China	Both	30 to 34	Other non-communicable diseases	Rate	1993	1.09868
Deaths	China	Both	35 to 39	Other non-communicable diseases	Rate	1993	0.93683
Deaths	China	Both	40 to 44	Other non-communicable diseases	Rate	1993	0.812624
Deaths	China	Both	45 to 49	Other non-communicable diseases	Rate	1993	0.712901
Deaths	China	Both	5 to 9	Other non-communicable diseases	Rate	1993	4.54915
Deaths	China	Both	50 to 54	Other non-communicable diseases	Rate	1993	0.675139
Deaths	China	Both	55 to 59	Other non-communicable diseases	Rate	1993	0.758495
Deaths	China	Both	60 to 64	Other non-communicable diseases	Rate	1993	0.882056
Deaths	China	Both	65 to 69	Other non-communicable diseases	Rate	1993	1.23686
Deaths	China	Both	70 to 74	Other non-communicable diseases	Rate	1993	1.54778
Deaths	China	Both	75 to 79	Other non-communicable diseases	Rate	1993	3.18274
Deaths	China	Both	80 to 84	Other non-communicable diseases	Rate	1993	7.77347
Deaths	China	Both	85 to 89	Other non-communicable diseases	Rate	1993	16.3801
Deaths	China	Both	90 to 94	Other non-communicable diseases	Rate	1993	37.4438
Deaths	China	Both	95 plus	Other non-communicable diseases	Rate	1993	69.4565
Deaths	China	Both	<1 year	Self-harm and interpersonal violence	Rate	1993	15.7814
Deaths	China	Both	1 to 4	Self-harm and interpersonal violence	Rate	1993	3.42513
Deaths	China	Both	10 to 14	Self-harm and interpersonal violence	Rate	1993	6.18687
Deaths	China	Both	15 to 19	Self-harm and interpersonal violence	Rate	1993	17.9587
Deaths	China	Both	20 to 24	Self-harm and interpersonal violence	Rate	1993	32.7501
Deaths	China	Both	25 to 29	Self-harm and interpersonal violence	Rate	1993	33.088
Deaths	China	Both	30 to 34	Self-harm and interpersonal violence	Rate	1993	29.4847
Deaths	China	Both	35 to 39	Self-harm and interpersonal violence	Rate	1993	28.3708
Deaths	China	Both	40 to 44	Self-harm and interpersonal violence	Rate	1993	27.14
Deaths	China	Both	45 to 49	Self-harm and interpersonal violence	Rate	1993	28.3819
Deaths	China	Both	5 to 9	Self-harm and interpersonal violence	Rate	1993	2.11015
Deaths	China	Both	50 to 54	Self-harm and interpersonal violence	Rate	1993	30.3921
Deaths	China	Both	55 to 59	Self-harm and interpersonal violence	Rate	1993	33.2536
Deaths	China	Both	60 to 64	Self-harm and interpersonal violence	Rate	1993	40.0249
Deaths	China	Both	65 to 69	Self-harm and interpersonal violence	Rate	1993	48.2566
Deaths	China	Both	70 to 74	Self-harm and interpersonal violence	Rate	1993	68.7624
Deaths	China	Both	75 to 79	Self-harm and interpersonal violence	Rate	1993	81.7692
Deaths	China	Both	80 to 84	Self-harm and interpersonal violence	Rate	1993	102.567
Deaths	China	Both	85 to 89	Self-harm and interpersonal violence	Rate	1993	110.375
Deaths	China	Both	90 to 94	Self-harm and interpersonal violence	Rate	1993	109.711
Deaths	China	Both	95 plus	Self-harm and interpersonal violence	Rate	1993	110.887
Deaths	China	Both	<1 year	Transport injuries	Rate	1993	16.2693
Deaths	China	Both	1 to 4	Transport injuries	Rate	1993	17.9121
Deaths	China	Both	10 to 14	Transport injuries	Rate	1993	9.01273
Deaths	China	Both	15 to 19	Transport injuries	Rate	1993	17.6644
Deaths	China	Both	20 to 24	Transport injuries	Rate	1993	28.5113
Deaths	China	Both	25 to 29	Transport injuries	Rate	1993	28.4971
Deaths	China	Both	30 to 34	Transport injuries	Rate	1993	27.9183
Deaths	China	Both	35 to 39	Transport injuries	Rate	1993	31.0549
Deaths	China	Both	40 to 44	Transport injuries	Rate	1993	31.1452
Deaths	China	Both	45 to 49	Transport injuries	Rate	1993	29.591
Deaths	China	Both	5 to 9	Transport injuries	Rate	1993	14.2203
Deaths	China	Both	50 to 54	Transport injuries	Rate	1993	28.7372
Deaths	China	Both	55 to 59	Transport injuries	Rate	1993	30.2684
Deaths	China	Both	60 to 64	Transport injuries	Rate	1993	31.7771
Deaths	China	Both	65 to 69	Transport injuries	Rate	1993	34.7583
Deaths	China	Both	70 to 74	Transport injuries	Rate	1993	41.5631
Deaths	China	Both	75 to 79	Transport injuries	Rate	1993	46.8745
Deaths	China	Both	80 to 84	Transport injuries	Rate	1993	50.1985
Deaths	China	Both	85 to 89	Transport injuries	Rate	1993	55.3973
Deaths	China	Both	90 to 94	Transport injuries	Rate	1993	56.3118
Deaths	China	Both	95 plus	Transport injuries	Rate	1993	80.2648
Deaths	China	Both	<1 year	Unintentional injuries	Rate	1993	150.502
Deaths	China	Both	1 to 4	Unintentional injuries	Rate	1993	79.8048
Deaths	China	Both	10 to 14	Unintentional injuries	Rate	1993	25.987
Deaths	China	Both	15 to 19	Unintentional injuries	Rate	1993	19.0524
Deaths	China	Both	20 to 24	Unintentional injuries	Rate	1993	21.3237
Deaths	China	Both	25 to 29	Unintentional injuries	Rate	1993	20.2249
Deaths	China	Both	30 to 34	Unintentional injuries	Rate	1993	20.0915
Deaths	China	Both	35 to 39	Unintentional injuries	Rate	1993	21.7432
Deaths	China	Both	40 to 44	Unintentional injuries	Rate	1993	23.7996
Deaths	China	Both	45 to 49	Unintentional injuries	Rate	1993	24.8555
Deaths	China	Both	5 to 9	Unintentional injuries	Rate	1993	36.5455
Deaths	China	Both	50 to 54	Unintentional injuries	Rate	1993	25.9533
Deaths	China	Both	55 to 59	Unintentional injuries	Rate	1993	28.0522
Deaths	China	Both	60 to 64	Unintentional injuries	Rate	1993	33.9633
Deaths	China	Both	65 to 69	Unintentional injuries	Rate	1993	41.5599
Deaths	China	Both	70 to 74	Unintentional injuries	Rate	1993	60.8768
Deaths	China	Both	75 to 79	Unintentional injuries	Rate	1993	93.4122
Deaths	China	Both	80 to 84	Unintentional injuries	Rate	1993	171.386
Deaths	China	Both	85 to 89	Unintentional injuries	Rate	1993	302.816
Deaths	China	Both	90 to 94	Unintentional injuries	Rate	1993	481.516
Deaths	China	Both	95 plus	Unintentional injuries	Rate	1993	790.057
Deaths	China	Both	<1 year	Cardiovascular diseases	Rate	1994	64.9219
Deaths	China	Both	1 to 4	Cardiovascular diseases	Rate	1994	7.94184
Deaths	China	Both	10 to 14	Cardiovascular diseases	Rate	1994	3.78297
Deaths	China	Both	15 to 19	Cardiovascular diseases	Rate	1994	8.45397
Deaths	China	Both	20 to 24	Cardiovascular diseases	Rate	1994	15.7786
Deaths	China	Both	25 to 29	Cardiovascular diseases	Rate	1994	19.7842
Deaths	China	Both	30 to 34	Cardiovascular diseases	Rate	1994	28.2337
Deaths	China	Both	35 to 39	Cardiovascular diseases	Rate	1994	45.2554
Deaths	China	Both	40 to 44	Cardiovascular diseases	Rate	1994	80.8409
Deaths	China	Both	45 to 49	Cardiovascular diseases	Rate	1994	138.486
Deaths	China	Both	5 to 9	Cardiovascular diseases	Rate	1994	3.59242
Deaths	China	Both	50 to 54	Cardiovascular diseases	Rate	1994	240.47
Deaths	China	Both	55 to 59	Cardiovascular diseases	Rate	1994	400.133
Deaths	China	Both	60 to 64	Cardiovascular diseases	Rate	1994	758.68
Deaths	China	Both	65 to 69	Cardiovascular diseases	Rate	1994	1241.17
Deaths	China	Both	70 to 74	Cardiovascular diseases	Rate	1994	2248.3
Deaths	China	Both	75 to 79	Cardiovascular diseases	Rate	1994	3437.95
Deaths	China	Both	80 to 84	Cardiovascular diseases	Rate	1994	5535.67
Deaths	China	Both	85 to 89	Cardiovascular diseases	Rate	1994	8306.99
Deaths	China	Both	90 to 94	Cardiovascular diseases	Rate	1994	12129.4
Deaths	China	Both	95 plus	Cardiovascular diseases	Rate	1994	18765.4
Deaths	China	Both	<1 year	Chronic respiratory diseases	Rate	1994	0
Deaths	China	Both	1 to 4	Chronic respiratory diseases	Rate	1994	2.24371
Deaths	China	Both	10 to 14	Chronic respiratory diseases	Rate	1994	0.81983
Deaths	China	Both	15 to 19	Chronic respiratory diseases	Rate	1994	1.97644
Deaths	China	Both	20 to 24	Chronic respiratory diseases	Rate	1994	3.19729
Deaths	China	Both	25 to 29	Chronic respiratory diseases	Rate	1994	4.4114
Deaths	China	Both	30 to 34	Chronic respiratory diseases	Rate	1994	6.49151
Deaths	China	Both	35 to 39	Chronic respiratory diseases	Rate	1994	9.71814
Deaths	China	Both	40 to 44	Chronic respiratory diseases	Rate	1994	17.7515
Deaths	China	Both	45 to 49	Chronic respiratory diseases	Rate	1994	32.8576
Deaths	China	Both	5 to 9	Chronic respiratory diseases	Rate	1994	0.858146
Deaths	China	Both	50 to 54	Chronic respiratory diseases	Rate	1994	67.1589
Deaths	China	Both	55 to 59	Chronic respiratory diseases	Rate	1994	132.633
Deaths	China	Both	60 to 64	Chronic respiratory diseases	Rate	1994	324.74
Deaths	China	Both	65 to 69	Chronic respiratory diseases	Rate	1994	610.227
Deaths	China	Both	70 to 74	Chronic respiratory diseases	Rate	1994	1386.34
Deaths	China	Both	75 to 79	Chronic respiratory diseases	Rate	1994	2260.32
Deaths	China	Both	80 to 84	Chronic respiratory diseases	Rate	1994	3823.15
Deaths	China	Both	85 to 89	Chronic respiratory diseases	Rate	1994	5759.47
Deaths	China	Both	90 to 94	Chronic respiratory diseases	Rate	1994	8099.39
Deaths	China	Both	95 plus	Chronic respiratory diseases	Rate	1994	11875.8
Deaths	China	Both	1 to 4	Cirrhosis and other chronic liver diseases	Rate	1994	0.971574
Deaths	China	Both	10 to 14	Cirrhosis and other chronic liver diseases	Rate	1994	0.427603
Deaths	China	Both	15 to 19	Cirrhosis and other chronic liver diseases	Rate	1994	0.764007
Deaths	China	Both	20 to 24	Cirrhosis and other chronic liver diseases	Rate	1994	1.80747
Deaths	China	Both	25 to 29	Cirrhosis and other chronic liver diseases	Rate	1994	3.59324
Deaths	China	Both	30 to 34	Cirrhosis and other chronic liver diseases	Rate	1994	6.94626
Deaths	China	Both	35 to 39	Cirrhosis and other chronic liver diseases	Rate	1994	12.0538
Deaths	China	Both	40 to 44	Cirrhosis and other chronic liver diseases	Rate	1994	19.2241
Deaths	China	Both	45 to 49	Cirrhosis and other chronic liver diseases	Rate	1994	28.1218
Deaths	China	Both	5 to 9	Cirrhosis and other chronic liver diseases	Rate	1994	0.410549
Deaths	China	Both	50 to 54	Cirrhosis and other chronic liver diseases	Rate	1994	36.9334
Deaths	China	Both	55 to 59	Cirrhosis and other chronic liver diseases	Rate	1994	45.3774
Deaths	China	Both	60 to 64	Cirrhosis and other chronic liver diseases	Rate	1994	59.5706
Deaths	China	Both	65 to 69	Cirrhosis and other chronic liver diseases	Rate	1994	70.7861
Deaths	China	Both	70 to 74	Cirrhosis and other chronic liver diseases	Rate	1994	88.6557
Deaths	China	Both	75 to 79	Cirrhosis and other chronic liver diseases	Rate	1994	102.984
Deaths	China	Both	80 to 84	Cirrhosis and other chronic liver diseases	Rate	1994	119.229
Deaths	China	Both	85 to 89	Cirrhosis and other chronic liver diseases	Rate	1994	131.994
Deaths	China	Both	90 to 94	Cirrhosis and other chronic liver diseases	Rate	1994	134.313
Deaths	China	Both	95 plus	Cirrhosis and other chronic liver diseases	Rate	1994	170.262
Deaths	China	Both	<1 year	Communicable, maternal, neonatal, and nutritional diseases	Rate	1994	2876.59
Deaths	China	Both	1 to 4	Communicable, maternal, neonatal, and nutritional diseases	Rate	1994	97.9793
Deaths	China	Both	10 to 14	Communicable, maternal, neonatal, and nutritional diseases	Rate	1994	8.37907
Deaths	China	Both	15 to 19	Communicable, maternal, neonatal, and nutritional diseases	Rate	1994	8.58001
Deaths	China	Both	20 to 24	Communicable, maternal, neonatal, and nutritional diseases	Rate	1994	14.5723
Deaths	China	Both	25 to 29	Communicable, maternal, neonatal, and nutritional diseases	Rate	1994	15.6813
Deaths	China	Both	30 to 34	Communicable, maternal, neonatal, and nutritional diseases	Rate	1994	17.3752
Deaths	China	Both	35 to 39	Communicable, maternal, neonatal, and nutritional diseases	Rate	1994	19.0733
Deaths	China	Both	40 to 44	Communicable, maternal, neonatal, and nutritional diseases	Rate	1994	22.5676
Deaths	China	Both	45 to 49	Communicable, maternal, neonatal, and nutritional diseases	Rate	1994	28.2195
Deaths	China	Both	5 to 9	Communicable, maternal, neonatal, and nutritional diseases	Rate	1994	15.4778
Deaths	China	Both	50 to 54	Communicable, maternal, neonatal, and nutritional diseases	Rate	1994	36.883
Deaths	China	Both	55 to 59	Communicable, maternal, neonatal, and nutritional diseases	Rate	1994	51.8381
Deaths	China	Both	60 to 64	Communicable, maternal, neonatal, and nutritional diseases	Rate	1994	85.8939
Deaths	China	Both	65 to 69	Communicable, maternal, neonatal, and nutritional diseases	Rate	1994	127.377
Deaths	China	Both	70 to 74	Communicable, maternal, neonatal, and nutritional diseases	Rate	1994	217.733
Deaths	China	Both	75 to 79	Communicable, maternal, neonatal, and nutritional diseases	Rate	1994	336.98
Deaths	China	Both	80 to 84	Communicable, maternal, neonatal, and nutritional diseases	Rate	1994	593.112
Deaths	China	Both	85 to 89	Communicable, maternal, neonatal, and nutritional diseases	Rate	1994	974
Deaths	China	Both	90 to 94	Communicable, maternal, neonatal, and nutritional diseases	Rate	1994	1584.09
Deaths	China	Both	95 plus	Communicable, maternal, neonatal, and nutritional diseases	Rate	1994	2962.37
Deaths	China	Both	<1 year	Diabetes, urogenital, blood, and endocrine diseases	Rate	1994	33.5001
Deaths	China	Both	1 to 4	Diabetes, urogenital, blood, and endocrine diseases	Rate	1994	5.99042
Deaths	China	Both	10 to 14	Diabetes, urogenital, blood, and endocrine diseases	Rate	1994	2.36935
Deaths	China	Both	15 to 19	Diabetes, urogenital, blood, and endocrine diseases	Rate	1994	3.05476
Deaths	China	Both	20 to 24	Diabetes, urogenital, blood, and endocrine diseases	Rate	1994	5.28358
Deaths	China	Both	25 to 29	Diabetes, urogenital, blood, and endocrine diseases	Rate	1994	6.09105
Deaths	China	Both	30 to 34	Diabetes, urogenital, blood, and endocrine diseases	Rate	1994	7.49168
Deaths	China	Both	35 to 39	Diabetes, urogenital, blood, and endocrine diseases	Rate	1994	9.50649
Deaths	China	Both	40 to 44	Diabetes, urogenital, blood, and endocrine diseases	Rate	1994	12.8214
Deaths	China	Both	45 to 49	Diabetes, urogenital, blood, and endocrine diseases	Rate	1994	17.8809
Deaths	China	Both	5 to 9	Diabetes, urogenital, blood, and endocrine diseases	Rate	1994	2.36451
Deaths	China	Both	50 to 54	Diabetes, urogenital, blood, and endocrine diseases	Rate	1994	25.5521
Deaths	China	Both	55 to 59	Diabetes, urogenital, blood, and endocrine diseases	Rate	1994	39.6724
Deaths	China	Both	60 to 64	Diabetes, urogenital, blood, and endocrine diseases	Rate	1994	68.7907
Deaths	China	Both	65 to 69	Diabetes, urogenital, blood, and endocrine diseases	Rate	1994	103.66
Deaths	China	Both	70 to 74	Diabetes, urogenital, blood, and endocrine diseases	Rate	1994	164.119
Deaths	China	Both	75 to 79	Diabetes, urogenital, blood, and endocrine diseases	Rate	1994	231.044
Deaths	China	Both	80 to 84	Diabetes, urogenital, blood, and endocrine diseases	Rate	1994	311.991
Deaths	China	Both	85 to 89	Diabetes, urogenital, blood, and endocrine diseases	Rate	1994	439.96
Deaths	China	Both	90 to 94	Diabetes, urogenital, blood, and endocrine diseases	Rate	1994	610.656
Deaths	China	Both	95 plus	Diabetes, urogenital, blood, and endocrine diseases	Rate	1994	952.055
Deaths	China	Both	<1 year	Diarrhea, lower respiratory, and other common infectious diseases	Rate	1994	1228.06
Deaths	China	Both	1 to 4	Diarrhea, lower respiratory, and other common infectious diseases	Rate	1994	88.647
Deaths	China	Both	10 to 14	Diarrhea, lower respiratory, and other common infectious diseases	Rate	1994	5.87314
Deaths	China	Both	15 to 19	Diarrhea, lower respiratory, and other common infectious diseases	Rate	1994	4.29855
Deaths	China	Both	20 to 24	Diarrhea, lower respiratory, and other common infectious diseases	Rate	1994	4.21968
Deaths	China	Both	25 to 29	Diarrhea, lower respiratory, and other common infectious diseases	Rate	1994	4.08455
Deaths	China	Both	30 to 34	Diarrhea, lower respiratory, and other common infectious diseases	Rate	1994	4.24598
Deaths	China	Both	35 to 39	Diarrhea, lower respiratory, and other common infectious diseases	Rate	1994	4.39694
Deaths	China	Both	40 to 44	Diarrhea, lower respiratory, and other common infectious diseases	Rate	1994	5.56823
Deaths	China	Both	45 to 49	Diarrhea, lower respiratory, and other common infectious diseases	Rate	1994	7.49644
Deaths	China	Both	5 to 9	Diarrhea, lower respiratory, and other common infectious diseases	Rate	1994	12.5825
Deaths	China	Both	50 to 54	Diarrhea, lower respiratory, and other common infectious diseases	Rate	1994	10.5703
Deaths	China	Both	55 to 59	Diarrhea, lower respiratory, and other common infectious diseases	Rate	1994	15.6338
Deaths	China	Both	60 to 64	Diarrhea, lower respiratory, and other common infectious diseases	Rate	1994	28.6843
Deaths	China	Both	65 to 69	Diarrhea, lower respiratory, and other common infectious diseases	Rate	1994	48.3458
[truncated: 35,828 more rows]

## Sheet: Life expectancy
measure	location	sex	age	metric	year	val
Life expectancy	China	Female	<1 year	Years	1990	69.1967
Life expectancy	China	Female	<1 year	Years	1991	69.4689
Life expectancy	China	Female	<1 year	Years	1992	69.716
Life expectancy	China	Female	<1 year	Years	1993	70.0124
Life expectancy	China	Female	<1 year	Years	1994	70.3717
Life expectancy	China	Female	<1 year	Years	1995	70.7243
Life expectancy	China	Female	<1 year	Years	1996	71.1329
Life expectancy	China	Female	<1 year	Years	1997	71.5157
Life expectancy	China	Female	<1 year	Years	1998	71.9314
Life expectancy	China	Female	<1 year	Years	1999	72.3278
Life expectancy	China	Female	<1 year	Years	2000	72.6604
Life expectancy	China	Female	<1 year	Years	2001	72.9956
Life expectancy	China	Female	<1 year	Years	2002	73.4093
Life expectancy	China	Female	<1 year	Years	2003	74.0968
Life expectancy	China	Female	<1 year	Years	2004	74.6882
Life expectancy	China	Female	<1 year	Years	2005	75.1922
Life expectancy	China	Female	<1 year	Years	2006	75.8144
Life expectancy	China	Female	<1 year	Years	2007	76.3263
Life expectancy	China	Female	<1 year	Years	2008	76.6323
Life expectancy	China	Female	<1 year	Years	2009	77.2175
Life expectancy	China	Female	<1 year	Years	2010	77.6018
Life expectancy	China	Female	<1 year	Years	2011	78.123
Life expectancy	China	Female	<1 year	Years	2012	78.5202
Life expectancy	China	Female	<1 year	Years	2013	78.8742
Life expectancy	China	Female	<1 year	Years	2014	79.084
Life expectancy	China	Female	<1 year	Years	2015	79.5193
Life expectancy	China	Female	<1 year	Years	2016	79.9268
Life expectancy	China	Male	<1 year	Years	1990	64.9834
Life expectancy	China	Male	<1 year	Years	1991	65.2586
Life expectancy	China	Male	<1 year	Years	1992	65.4259
Life expectancy	China	Male	<1 year	Years	1993	65.6171
Life expectancy	China	Male	<1 year	Years	1994	65.819
Life expectancy	China	Male	<1 year	Years	1995	66.1532
Life expectancy	China	Male	<1 year	Years	1996	66.4191
Life expectancy	China	Male	<1 year	Years	1997	66.6599
Life expectancy	China	Male	<1 year	Years	1998	66.9081
Life expectancy	China	Male	<1 year	Years	1999	67.2417
Life expectancy	China	Male	<1 year	Years	2000	67.5834
Life expectancy	China	Male	<1 year	Years	2001	67.8242
Life expectancy	China	Male	<1 year	Years	2002	68.0535
Life expectancy	China	Male	<1 year	Years	2003	68.7412
Life expectancy	China	Male	<1 year	Years	2004	69.2734
Life expectancy	China	Male	<1 year	Years	2005	69.736
Life expectancy	China	Male	<1 year	Years	2006	70.3383
Life expectancy	China	Male	<1 year	Years	2007	70.8178
Life expectancy	China	Male	<1 year	Years	2008	70.9679
Life expectancy	China	Male	<1 year	Years	2009	71.4435
Life expectancy	China	Male	<1 year	Years	2010	71.6862
Life expectancy	China	Male	<1 year	Years	2011	72.091
Life expectancy	China	Male	<1 year	Years	2012	72.444
Life expectancy	China	Male	<1 year	Years	2013	72.6587
Life expectancy	China	Male	<1 year	Years	2014	72.7961
Life expectancy	China	Male	<1 year	Years	2015	73.0905
Life expectancy	China	Male	<1 year	Years	2016	73.3593
